# Supplementary material for: Phage-inducible chromosomal islands are ubiquitous within the bacterial universe
Source: PubMed Central journal article supplement (PMC6092414; doi:10.1038/s41396-018-0156-3), 2018-06-06
Supplement: 41396_2018_156_MOESM1_ESM.pdf [file 41396_2018_156_MOESM1_ESM.pdf]

**Table S1. PICIs in the Gram-negative (GN) bacteria: Genomes and characteristics.**

| PICI              | Strain                                                            | Accession number<br>(Genomic location) | Size<br>(Kb) | att site core                                  | att gene             | Accessory genes           |
|-------------------|-------------------------------------------------------------------|----------------------------------------|--------------|------------------------------------------------|----------------------|---------------------------|
| EcCICFT073        | <i>Escherichia coli</i> CFT073                                    | AE014075.1<br>(1377749-1389210)        | 11.4         | GGACATATTT                                     | <i>ycfD-phoQ</i>     | <i>rdgR</i> ; <i>perC</i> |
| EcCIRM12579       | <i>Escherichia coli</i> O55:H7 str.<br>RM12579                    | NC_017656.1<br>(1438155-1449376)       | 11.2         | GGACATATTT                                     | <i>ycfD-phoQ</i>     | <i>rdgR</i> ; <i>perC</i> |
| EcCI042           | <i>Escherichia coli</i> 042                                       | FN554766.1<br>(1832521-1843554)        | 11           | ATAACAGCA                                      | <i>tqsA</i>          | <i>rdgR</i> ; <i>perC</i> |
| EcCIK1516         | <i>Escherichia coli</i> O15:H18 str.<br>K1516                     | JHJE01000001.1<br>(141718-153137)      | 11.4         | ATAACAGCA                                      | <i>tqsA</i>          | <i>rdgR</i>               |
| EcCIATCC<br>25922 | <i>Escherichia coli</i> ATCC 25922                                | CP009072.1<br>(106749-118031)          | 11.3         | TTTTAGTTATACGTTT<br>TTTTAGTTATACGTTTGGTTATACGG | <i>yejM-luxR</i>     | <i>rdgR</i>               |
| EcCIED1a.1        | <i>Escherichia coli</i> ED1a                                      | CU928162.2<br>(2568989-2580428)        | 11.4         | TTTTAGTTATACGTTT<br>TTTTAGTTATACGTTTGGTTATACGG | <i>yejM-luxR</i>     | <i>rdgR</i>               |
| EcCI11128         | <i>Escherichia coli</i> O111:H- str.<br>11128                     | AP010960.1<br>(2855234-2864550)        | 9.3          | TTTTAGTTATACGTTT<br>TTTTAGTTATACGTTTGGTTATACGG | <i>yejM-luxR</i>     | <i>rdgR</i>               |
| EcCI11368.1       | <i>Escherichia coli</i> O26:H11 str.<br>11368                     | AP010953.1<br>(3041660-3050231)        | 8.5          | TTTTAGTTATACGTTT<br>TTTTAGTTATACGTTTGGTTATACGG | <i>yejM-luxR</i>     | <i>rdgR</i>               |
| EcCIIHE3034       | <i>Escherichia coli</i> IHE3034                                   | NC_017628.1<br>(920272-930825)         | 10.5         | ATGATAGTTAT                                    | <i>cspD-clpS</i>     | <i>rdgR</i>               |
| EcCI18098         | <i>Escherichia coli</i> ST127 18098                               | AP010953.1<br>(3041660-3050231)        | 10.8         | ATGATAGTTAT                                    | <i>cspD-clpS</i>     | <i>rdgR</i>               |
| EcCIEC2733.1      | <i>Escheichia coli</i> genome<br>assembly 1.EC2733.1              | CXXR01000010.1<br>(90531-101020)       | 10.5         | ACATTATTAATATCGTGA                             | <i>lysR-smrA</i>     | <i>rdgR</i>               |
| EcCIDi14          | <i>Escherichia coli</i> clone D i14                               | CP002212<br>(249047-259688)            | 10.6         | CGGTGTAGTTAATGGTGTAGTTAATT                     | IS110<br>transposase | <i>rdgR</i>               |
| EcCIRM13514       | <i>Escherichia coli</i> O145 H28 str.<br>RM13514                  | CP006027<br>(4527455-4539396)          | 11.9         | GAGCAGATTCAA                                   | <i>yicC-dinD</i>     | <i>rdgR</i>               |
| EcCI224           | <i>Escherichia coli</i> strain Ecol_224                           | CP018948.1<br>(1961620-1972242)        | 10.6         | AGAAATACCCGTAT                                 | <i>frmR-thiM</i>     | <i>rdgR</i>               |
| PmCIHB03          | <i>Pasteurella multocida</i> subsp.<br><i>multocida</i> str. HB03 | CP003328.1<br>(1623899-1638673)        | 14.7         | TTCGACTCCCATTCTC                               | <i>selA-hsrA</i>     | <i>abiF</i>               |
| PmCIOH1905        | <i>Pasteurella multocida</i> OH1905                               | CP004392.1<br>(1709089-1717107)        | 8            | AGTCCTGTTGGG                                   | <i>dctQ-yeaQ</i>     |                           |
| PmCI172           | <i>Pasteurella multocida</i> 172                                  | MH238469                               | 7.8          | AGTCCTGTTGGG                                   | <i>dctQ-yeaQ</i>     |                           |
| PmCI82            | <i>Pasteurella multocida</i> 82                                   | MH238468                               | 7.9          | AGTCCTGTTGGG                                   | <i>dctQ-yeaQ</i>     |                           |
| SdCI1012          | <i>Shigella dysenteriae</i> 1012                                  | AAMJ02000027.1<br>(22790-33855)        | 11           | TTTTAGTTATACGTTT<br>TTTTAGTTATACGTTTGGTTATACGG | <i>yejM-aidA</i>     | <i>rdgR</i>               |

| PICI           | Strain                                                                 | Accession number                  | Size | att site core                                                                  | att gene         | Accessory genes   |
|----------------|------------------------------------------------------------------------|-----------------------------------|------|--------------------------------------------------------------------------------|------------------|-------------------|
| SbCISb277      | <i>Shigella boydii</i> Sb227                                           | CP000036<br>(2097873-2108605)     | 10.7 | TTTTAGTTATACGCTTAGTTATACGG/<br>TTTTAGTTATACGTTTGGTTATACGG                      | <i>yejM-aidA</i> | <i>rdgR; perC</i> |
| DiCI3937       | <i>Dickeya dadantii</i> 3937                                           | CP002038.1<br>(3753070-3764812)   | 11.7 | GAGTGGATTTTAGTAGACTTAGGGAAACGT                                                 | <i>proA</i>      | <i>yafN; yafO</i> |
| PcCIPCC221     | <i>Pectobacterium carotovorum</i><br>subsp. <i>carotovorum</i> PCC21   | CP003776.1<br>(1838416-1848145)   | 9.7  | CTATCGGCATA                                                                    | CMP              | <i>parE; reB</i>  |
| PcCISCRI1043   | <i>Pectobacterium carotovora</i><br>subsp. <i>atroseptica</i> SCRI1043 | NC_004547.2<br>(3091994-3101397)  | 9.4  | GCATTCTCACTGAGTTTGCGGGTTTTTTGT<br>TGCCTGTTATCTATCGGGATACCCCGTTTA<br>CAGCCGAAAA | <i>yejM</i>      | <i>parE</i>       |
| CfCIP10159     | <i>Citrobacter freundii</i> strain P10159                              | CP012554.1<br>(2684917-2697361)   | 12.4 | ATCGAGTAAG                                                                     | <i>yicC-yicG</i> | <i>perC</i>       |
| AaCIF0387      | <i>Aggregatibacter aphrophilus</i><br>F0387                            | ACZJ01000009.1<br>(141541-149751) | 8.2  | AGTCCTGTTGGG                                                                   | <i>rpoD</i>      |                   |
| AacCIRhAA1     | <i>Aggregatibacter</i><br><i>actinomycetemcomitans</i> RhAA1           | AHGR01000004.1<br>(357167-365116) | 7.9  | AAAATAGTACCCATTT                                                               | <i>gltX-cspC</i> |                   |
| PhaCIATCC43949 | <i>Photorhabdus asymbiotica</i><br>ATCC43949                           | FM162591<br>(3134213-3145217)     | 11   | AACAAAATCAAACAA                                                                | <i>tusE-casI</i> |                   |
| NmCIFF6        | <i>Necropsobacter massiliensis</i><br>genome assembly strain FF6       | CDON01000001<br>(135049-142542)   | 7.5  | TTTGGTAACACGTTTAGTAACAC                                                        | <i>gltX-tonB</i> |                   |
| CnCIND14b      | <i>Cedecea neteri</i> strain ND14b                                     | CP009460.1<br>(3954409-3966716)   | 12.3 | TCCTATTATC                                                                     | ADH-SDR          | <i>yafN; yafO</i> |

**Table S2. EcCICFT073 orthologies.**

| EcCICFT073 gene | Function   | Orthologs           | Species                     | Full name                                | Length | Similarity | Overlap | Element         | Start   | End      | Size | Comments                                          |
|-----------------|------------|---------------------|-----------------------------|------------------------------------------|--------|------------|---------|-----------------|---------|----------|------|---------------------------------------------------|
| c1483           | <i>int</i> | ecc:c1483           | <i>Escherichia coli</i>     | <i>Escherichia coli</i> O6:K2:H1 CFT073  | 314    | 1.000      |         | EcCICFT073      |         |          |      |                                                   |
|                 |            | ece:Z1835           | <i>Escherichia coli</i>     | <i>Escherichia coli</i> O157:H7 EDL933   | 416    | 0.978      | 312     | PICI?           | 1678546 | 1694015  | 15.5 | HNH; <i>ter</i> L                                 |
|                 |            | ecs:ECs1574         | <i>Escherichia coli</i>     | <i>Escherichia coli</i> O157:H7 Sakai    | 409    | 0.978      | 312     | PICI?           | 1594570 | 1610042  | 15.5 | Same as <i>Escherichia coli</i> O157:H7 EDL933    |
|                 |            | elx:CDCO157_1506    | <i>Escherichia coli</i>     | <i>Escherichia coli</i> O157:H7 Xuzhou21 | 409    | 0.978      | 312     | PICI?           | 1596512 | 1611982  | 15.5 | Same as <i>Escherichia coli</i> O157:H7 EDL933    |
|                 |            | sfe:SFxv_1284       | <i>Shigella flexneri</i>    | <i>Shigella flexneri</i> 2002017         | 416    | 0.978      | 312     | PICI?           | 1232114 | 1246489  | 14.4 | HNH; <i>ter</i> L                                 |
|                 |            | sfn:SFy_1623        | <i>Shigella flexneri</i>    | <i>Shigella flexneri</i> 2003036         | 416    | 0.978      | 312     | PICI?           | 1198620 | 1213000  | 14.4 | Same as <i>Shigella flexneri</i> 2002017          |
|                 |            | sfs:SFyv_1675       | <i>Shigella flexneri</i>    | <i>Shigella flexneri</i> Shi06HN006      | 416    | 0.978      | 312     | PICI?           | 1217313 | 1231688  | 14.4 | Same as <i>Shigella flexneri</i> 2002017          |
|                 |            | sft:NCTC1_01185     | <i>Shigella flexneri</i>    | <i>Shigella flexneri</i> NCTC1           | 409    | 0.978      | 312     | PICI?           | 1133207 | 1147945  | 14.7 | Similar to <i>Shigella flexneri</i> 2002017       |
|                 |            | sfx:S1211           | <i>Shigella flexneri</i>    | <i>Shigella flexneri</i> 2457T           | 409    | 0.978      | 312     | PICI?           | 1177656 | 1192394  | 14.7 | Similar to <i>Shigella flexneri</i> 2002017       |
|                 |            | ecf:ECH74115_1571   | <i>Escherichia coli</i>     | <i>Escherichia coli</i> O157:H7 EC4115   | 409    | 0.971      | 312     | PICI            | 1535498 | 15466717 | 11.2 |                                                   |
|                 |            | ecoh:ECRM13516_1440 | <i>Escherichia coli</i>     | <i>Escherichia coli</i> O145:H28 RM13516 | 409    | 0.971      | 312     | PICI            | 1438775 | 1449995  | 11.2 | Same as <i>Escherichia coli</i> O157:H7 EC4115    |
|                 |            | ecoo:ECRM13514_1484 | <i>Escherichia coli</i>     | <i>Escherichia coli</i> O145:H28 RM13514 | 409    | 0.971      | 312     | PICI            | 1462244 | 1473465  | 11.2 | Same as <i>Escherichia coli</i> O157:H7 EC4115    |
|                 |            | ect:ECIAI39_2027    | <i>Escherichia coli</i>     | <i>Escherichia coli</i> O7:K1 IA139      | 416    | 0.974      | 312     | PICI?           | 2060161 | 2074688  | 14.5 | HNH; <i>ter</i> L                                 |
|                 |            | elr:ECO55CA74_06770 | <i>Escherichia coli</i>     | <i>Escherichia coli</i> O55:H7 RM12579   | 409    | 0.971      | 312     | PICI            | 1438165 | 1449376  | 11.2 | Same as <i>Escherichia coli</i> O157:H7 EC4115    |
|                 |            | eok:G2583_1387      | <i>Escherichia coli</i>     | <i>Escherichia coli</i> O55:H7 CB9615    | 416    | 0.971      | 312     | PICI            | 1444572 | 1455794  | 11.2 | Same as <i>Escherichia coli</i> O157:H7 EC4115    |
|                 |            | etw:ECSP_1490       | <i>Escherichia coli</i>     | <i>Escherichia coli</i> O157:H7 TW14359  | 409    | 0.971      | 312     | PICI            | 1535786 | 1547005  | 11.2 | Same as <i>Escherichia coli</i> O157:H7 EC4115    |
|                 |            | sfv:SFV_1147        | <i>Shigella flexneri</i>    | <i>Shigella flexneri</i> 8401            | 416    | 0.974      | 312     | PICI?           | 1192843 | 1208358  | 15.5 | Similar to <i>Shigella flexneri</i> 2002017       |
|                 |            | eoc:CE10_1211       | <i>Escherichia coli</i>     | <i>Escherichia coli</i> O7:K1 CE10       | 409    | 0.968      | 312     | PICI?           | 1260279 | 1274777  | 14.5 | HNH; <i>ter</i> L                                 |
|                 |            | eoh:ECO103_1236     | <i>Escherichia coli</i>     | <i>Escherichia coli</i> O103:H2 12009    | 415    | 0.968      | 312     | PICI            | 1325875 | 1336965  | 11.1 | Similar to <i>Escherichia coli</i> O157:H7 EC4115 |
|                 |            | ej:ECO26_1646       | <i>Escherichia coli</i>     | <i>Escherichia coli</i> O26:H11 11368    | 409    | 0.968      | 312     | PICI            | 1619447 | 1630554  | 11.1 | Same as <i>Escherichia coli</i> O157:H7 EC4115    |
|                 |            | elo:EC042_1767      | <i>Escherichia coli</i>     | <i>Escherichia coli</i> O44:H18 042      | 405    | 0.946      | 312     | PICI            | 1832521 | 1843545  | 11   |                                                   |
|                 |            | ecq:ECED1_1798      | <i>Escherichia coli</i>     | <i>Escherichia coli</i> O81 ED1a         | 409    | 0.942      | 312     | PICI?           | 1739927 | 1756201  | 16.3 | HNH; <i>ter</i> L                                 |
|                 |            | elc:i14_0243        | <i>Escherichia coli</i>     | <i>Escherichia coli</i> clone D i14      | 291    | 0.862      | 290     | PICI            | 249047  | 259688   | 10.6 |                                                   |
|                 |            | eld:i02_0243        | <i>Escherichia coli</i>     | <i>Escherichia coli</i> clone D i2       | 291    | 0.862      | 290     | PICI            | 249047  | 259688   | 10.6 | Same as <i>Escherichia coli</i> clone D i14       |
|                 |            | ecoi:ECOPMV1_00884  | <i>Escherichia coli</i>     | <i>Escherichia coli</i> PMV-1            | 412    | 0.756      | 308     | PICI            | 919885  | 930438   | 10.5 |                                                   |
|                 |            | eih:ECOK1_0883      | <i>Escherichia coli</i>     | <i>Escherichia coli</i> IHE3034          | 412    | 0.756      | 308     | PICI            | 920272  | 930825   | 10.5 | Same as <i>Escherichia coli</i> PMV-1             |
|                 |            | elu:UM146_13240     | <i>Escherichia coli</i>     | <i>Escherichia coli</i> UM146            | 412    | 0.756      | 308     | PICI            | 2721434 | 2731984  | 10.5 | Same as <i>Escherichia coli</i> PMV-1             |
|                 |            | ssn:SSON_0868       | <i>Shigella sonnei</i>      | <i>Shigella sonnei</i> Ss046             | 412    | 0.760      | 308     | PICI            | 922309  | 936578   | 14.3 |                                                   |
|                 |            | ecm:EcSMS35_0939    | <i>Escherichia coli</i>     | <i>Escherichia coli</i> SMS-3-5          | 406    | 0.685      | 305     | PICI?           | 955625  | 970780   | 15.2 | HNH; <i>ter</i> L                                 |
|                 |            | yak:ACZ76_07050     | <i>Yersinia aleksiciae</i>  | <i>Yersinia aleksiciae</i> 159           | 407    | 0.543      | 3013    | PICI?           | 1512198 | 1528170  | 15.9 |                                                   |
|                 |            | xbv:XBW1_1862       | <i>Xenorhabdus bovienii</i> | <i>Xenorhabdus bovienii</i> CS03         | 406    | 0.537      | 309     | Defective PICI? |         |          |      | <i>att</i> ? Packaging?                           |

| EcCICFT073 gene   | Function                    | Orthologs                              | Species                        | Full name                                                   | Length | Similarity | Overlap | Element         | Start   | End                     | Size | Comments                                          |
|-------------------|-----------------------------|----------------------------------------|--------------------------------|-------------------------------------------------------------|--------|------------|---------|-----------------|---------|-------------------------|------|---------------------------------------------------|
| c1487             | icd-like                    | ecc:c1487                              | <i>Escherichia coli</i>        | <i>Escherichia coli</i> O6:K2:H1 CFT073                     | 428    | 1.000      |         | EcCICFT073      |         |                         |      |                                                   |
|                   |                             | elc:i14_0245                           | <i>Escherichia coli</i>        | <i>Escherichia coli</i> clone D i14                         | 396    | 0.684      | 380     | PICI            | 249047  | 259688                  | 10.6 |                                                   |
|                   |                             | eld:i02_0245                           | <i>Escherichia coli</i>        | <i>Escherichia coli</i> clone D i2                          | 396    | 0.684      | 380     | PICI            | 249047  | 259688                  | 10.6 | Same as <i>Escherichia coli</i> clone D i14       |
|                   |                             | elo:EC042_2166                         | <i>Escherichia coli</i>        | <i>Escherichia coli</i> O44:H18 O42                         | 357    | 0.630      | 354     | Prophage?       |         |                         |      | Chimera prophage & PICI                           |
|                   |                             | eoh:ECO103_1238                        | <i>Escherichia coli</i>        | <i>Escherichia coli</i> O103:H2 12009                       | 342    | 0.639      | 319     | PICI            | 1325875 | 1336965                 | 11.1 | Similar to <i>Escherichia coli</i> O157:H7 EC4115 |
|                   |                             | ej:ECO26_1648                          | <i>Escherichia coli</i>        | <i>Escherichia coli</i> O26:H11 11368                       | 342    | 0.639      | 319     | PICI            | 1619447 | 1630554                 | 11.1 | Same as <i>Escherichia coli</i> O157:H7 EC4115    |
|                   |                             | ect:ECIAI39_2024                       | <i>Escherichia coli</i>        | <i>Escherichia coli</i> O7:K1 IAI39                         | 353    | 0.481      | 337     | PICI?           | 2060161 | 2074688                 | 14.5 | HNH; terL                                         |
|                   |                             | ecoo:ECRM13514_4638                    | <i>Escherichia coli</i>        | <i>Escherichia coli</i> O145:H28 RM13514                    | 488    | 0.425      | 334     | PICI            | 4527455 | 4539396                 | 11.9 |                                                   |
|                   |                             | sbc:SbBS512_E2184                      | <i>Shigella boydii</i>         | <i>Shigella boydii</i> CDC 3083-94                          | 329    | 0.429      | 329     | Defective PICI? |         |                         |      | Only an <i>int</i> fragment and <i>alpA</i>       |
|                   |                             | eab:ECABU_c40880                       | <i>Escherichia coli</i>        | <i>Escherichia coli</i> ABU 83972                           | 283    | 0.610      | 200     | Defective PICI? |         |                         |      | Only an <i>int</i> fragment and <i>alpA</i>       |
| ecf:ECH74115_1572 | <i>Escherichia coli</i>     | <i>Escherichia coli</i> O157:H7 EC4115 | 314                            | 0.422                                                       | 327    | PICI       | 1535498 | 15466717        | 11.2    |                         |      |                                                   |
| c1488             |                             | ecc:c1488                              | <i>Escherichia coli</i>        | <i>Escherichia coli</i> O6:K2:H1 CFT073                     | 76     | 1.000      |         | EcCICFT073      |         |                         |      |                                                   |
|                   |                             | eoi:ECO111_2916                        | <i>Escherichia coli</i>        | <i>Escherichia coli</i> O111:H- 11128                       | 152    | 0.903      | 72      | PICI            | 2855234 | 2864550                 | 9.3  |                                                   |
|                   |                             | ecq:ECED1_1789                         | <i>Escherichia coli</i>        | <i>Escherichia coli</i> O81 ED1a                            | 63     | 0.525      | 59      | PICI?           | 1739927 | 1756201                 | 16.3 | HNH; terL                                         |
|                   |                             | ecs:ECs1579                            | <i>Escherichia coli</i>        | <i>Escherichia coli</i> O157:H7 Sakai                       | 63     | 0.525      | 59      | PICI?           | 1594570 | 1610042                 | 15.5 | Same as <i>Escherichia coli</i> O157:H7 EDL933    |
|                   |                             | elx:CDCO157_1512                       | <i>Escherichia coli</i>        | <i>Escherichia coli</i> O157:H7 Xuzhou21                    | 63     | 0.525      | 59      | PICI?           | 1596512 | 1611982                 | 15.5 | Same as <i>Escherichia coli</i> O157:H7 EDL933    |
|                   |                             | pgc:LG71_03455                         | <i>Pluralibacter gergoviae</i> | <i>Pluralibacter gergoviae</i> FB2                          | 65     | 0.541      | 61      | PICI?           | 713730  | 733670                  | 19.9 | tail                                              |
|                   |                             | eclo:ENC_17430                         | <i>Enterobacter cloacae</i>    | <i>Enterobacter cloacae</i> subsp. <i>cloacae</i> NCTC 9394 | 63     | 0.466      | 58      | No insert       |         |                         |      |                                                   |
|                   |                             | pfq:QQ39_05060                         | <i>Pragia fontium</i>          | <i>Pragia fontium</i> 24613                                 | 74     | 0.508      | 65      | Prophage        |         |                         |      |                                                   |
|                   |                             | cif:AL515_00785                        | <i>Citrobacter</i>             | <i>Citrobacter</i> sp. FDAARGOS_156                         | 66     | 0.492      | 61      | PICI?           | 164335  | 175860                  | 11.5 | Not commun structure                              |
|                   |                             | xpo:XPY1_0943                          | <i>Xenorhabdus poinarii</i>    | <i>Xenorhabdus poinarii</i> G6                              | 84     | 0.519      | 54      | Prophage?       |         |                         |      | Chimera prophage & PICI                           |
| xbv:XBW1_2816     | <i>Xenorhabdus bovienii</i> | <i>Xenorhabdus bovienii</i> CS03       | 82                             | 0.400                                                       | 70     | Prophage?  |         |                 |         | Chimera prophage & PICI |      |                                                   |
| c1490             |                             | ecc:c1490                              | <i>Escherichia coli</i>        | <i>Escherichia coli</i> O6:K2:H1 CFT073                     | 73     | 1.000      |         | EcCICFT073      |         |                         |      |                                                   |
|                   |                             | ej:ECO26_3108                          | <i>Escherichia coli</i>        | <i>Escherichia coli</i> O26:H11 11368                       | 80     | 1.000      | 71      | PICI            | 3041660 | 3050231                 | 8.5  | Similar to <i>Escherichia coli</i> O111:H- 11128  |
|                   |                             | sfs:SFyv_1680                          | <i>Shigella flexneri</i>       | <i>Shigella flexneri</i> Shi06HN006                         | 73     | 0.973      | 73      | PICI?           | 1217313 | 1231688                 | 14.4 | Same as <i>Shigella flexneri</i> 2002017          |
|                   |                             | sft:NCTC1_01188                        | <i>Shigella flexneri</i>       | <i>Shigella flexneri</i> NCTC1                              | 73     | 0.973      | 73      | PICI?           | 1133207 | 1147945                 | 14.7 | Similar to <i>Shigella flexneri</i> 2002017       |
|                   |                             | eoi:ECO111_2916                        | <i>Escherichia coli</i>        | <i>Escherichia coli</i> O111:H- 11128                       | 152    | 0.972      | 71      | PICI            | 2855234 | 2864550                 | 9.3  |                                                   |
|                   |                             | elo:EC042_1762                         | <i>Escherichia coli</i>        | <i>Escherichia coli</i> O44:H18 O42                         | 155    | 0.513      | 78      | PICI            | 1832521 | 1843545                 | 11   |                                                   |
|                   |                             | ecoh:ECRM13516_1443                    | <i>Escherichia coli</i>        | <i>Escherichia coli</i> O145:H28 RM13516                    | 154    | 0.506      | 77      | PICI            | 1438775 | 1449995                 | 11.2 | Same as <i>Escherichia coli</i> O157:H7 EC4115    |
|                   |                             | ecoo:ECRM13514_1487                    | <i>Escherichia coli</i>        | <i>Escherichia coli</i> O145:H28 RM13514                    | 154    | 0.506      | 77      | PICI            | 1462244 | 1473465                 | 11.2 | Same as <i>Escherichia coli</i> O157:H7 EC4115    |
|                   |                             | etw:ECSP_1494                          | <i>Escherichia coli</i>        | <i>Escherichia coli</i> O157:H7 TW14359                     | 154    | 0.506      | 77      | PICI            | 1535786 | 1547005                 | 11.2 | Same as <i>Escherichia coli</i> O157:H7 EC4115    |
|                   |                             | eoh:ECO103_1239                        | <i>Escherichia coli</i>        | <i>Escherichia coli</i> O103:H2 12009                       | 154    | 0.481      | 77      | PICI            | 1325875 | 1336965                 | 11.1 | Similar to <i>Escherichia coli</i> O157:H7 EC4115 |

| EcCICFT073 gene | Function | Orthologs            | Species                  | Full name                                | Length | Similarity | Overlap | Element    | Start   | End      | Size | Comments                                          |
|-----------------|----------|----------------------|--------------------------|------------------------------------------|--------|------------|---------|------------|---------|----------|------|---------------------------------------------------|
|                 |          | elc:i14_0247         | <i>Escherichia coli</i>  | <i>Escherichia coli</i> clone D i14      | 78     | 0.405      | 74      | PICI       | 249047  | 259688   | 10.6 |                                                   |
| c1491           |          | ecc:c1491            | <i>Escherichia coli</i>  | <i>Escherichia coli</i> O6:K2:H1 CFT073  | 79     | 1.000      |         | EcCICFT073 |         |          |      |                                                   |
|                 |          | sbo:SBO_2132         | <i>Shigella boydii</i>   | <i>Shigella boydii</i> Sb227             | 93     | 0.835      | 79      | PICI       | 2097873 | 2108560  | 10.7 |                                                   |
|                 |          | ecoh:ECRM13516_144_3 | <i>Escherichia coli</i>  | <i>Escherichia coli</i> O145:H28 RM13516 | 154    | 0.855      | 76      | PICI       | 1438775 | 1449995  | 11.2 | Same as <i>Escherichia coli</i> O157:H7 EC4115    |
|                 |          | ecoo:ECRM13514_148_7 | <i>Escherichia coli</i>  | <i>Escherichia coli</i> O145:H28 RM13514 | 154    | 0.855      | 76      | PICI       | 1462244 | 1473465  | 11.2 | Same as <i>Escherichia coli</i> O157:H7 EC4115    |
|                 |          | elo:EC042_1762       | <i>Escherichia coli</i>  | <i>Escherichia coli</i> O44:H18 O42      | 155    | 0.855      | 76      | PICI       | 1832521 | 1843545  | 11   |                                                   |
|                 |          | ej:ECO26_1649        | <i>Escherichia coli</i>  | <i>Escherichia coli</i> O26:H11 11368    | 154    | 0.855      | 76      | PICI       | 1619447 | 1630554  | 11.1 | Same as <i>Escherichia coli</i> O157:H7 EC4115    |
|                 |          | etw:ECSP_1494        | <i>Escherichia coli</i>  | <i>Escherichia coli</i> O157:H7 TW14359  | 154    | 0.855      | 76      | PICI       | 1535786 | 1547005  | 11.2 | Same as <i>Escherichia coli</i> O157:H7 EC4115    |
|                 |          | eoh:ECO103_1239      | <i>Escherichia coli</i>  | <i>Escherichia coli</i> O103:H2 12009    | 154    | 0.842      | 76      | PICI       | 1325875 | 1336965  | 11.1 | Similar to <i>Escherichia coli</i> O157:H7 EC4115 |
|                 |          | eoi:ECO111_2917      | <i>Escherichia coli</i>  | <i>Escherichia coli</i> O111:H- 11128    | 77     | 0.849      | 73      | PICI       | 2855234 | 2864550  | 9.3  |                                                   |
|                 |          | eok:G2583_1393       | <i>Escherichia coli</i>  | <i>Escherichia coli</i> O55:H7 CB9615    | 77     | 0.849      | 73      | PICI       | 1444572 | 1455794  | 11.2 | Same as <i>Escherichia coli</i> O157:H7 EC4115    |
|                 |          | sfe:SFxv_1288        | <i>Shigella flexneri</i> | <i>Shigella flexneri</i> 2002017         | 66     | 0.981      | 54      | PICI?      | 1232114 | 1246489  | 14.4 | HNH; terL                                         |
| c1492           |          | ecc:c1492            | <i>Escherichia coli</i>  | <i>Escherichia coli</i> O6:K2:H1 CFT073  | 77     | 1.000      |         | EcCICFT073 |         |          |      |                                                   |
|                 |          | sfe:SFxv_1289        | <i>Shigella flexneri</i> | <i>Shigella flexneri</i> 2002017         | 77     | 0.896      | 77      | PICI?      | 1232114 | 1246489  | 14.4 | HNH; terL                                         |
|                 |          | sfi:SF1133a          | <i>Shigella flexneri</i> | <i>Shigella flexneri</i> 301             | 77     | 0.896      | 77      | PICI?      | 1174763 | 1189501  | 14.7 | Similar to <i>Shigella flexneri</i> 2002017       |
|                 |          | sfn:SFy_1629         | <i>Shigella flexneri</i> | <i>Shigella flexneri</i> 2003036         | 77     | 0.896      | 77      | PICI?      | 1198620 | 1213000  | 14.4 | Same as <i>Shigella flexneri</i> 2002017          |
|                 |          | sfs:SFyv_1682        | <i>Shigella flexneri</i> | <i>Shigella flexneri</i> Shi06HN006      | 77     | 0.896      | 77      | PICI?      | 1217313 | 1231688  | 14.4 | Same as <i>Shigella flexneri</i> 2002017          |
|                 |          | sfi:NCTC1_01189      | <i>Shigella flexneri</i> | <i>Shigella flexneri</i> NCTC1           | 77     | 0.896      | 77      | PICI?      | 1133207 | 1147945  | 14.7 | Similar to <i>Shigella flexneri</i> 2002017       |
|                 |          | ecf:ECH74115_1575    | <i>Escherichia coli</i>  | <i>Escherichia coli</i> O157:H7 EC4115   | 77     | 0.870      | 77      | PICI       | 1535498 | 15466717 | 11.2 |                                                   |
|                 |          | ecoh:ECRM13516_144_4 | <i>Escherichia coli</i>  | <i>Escherichia coli</i> O145:H28 RM13516 | 77     | 0.870      | 77      | PICI       | 1438775 | 1449995  | 11.2 | Same as <i>Escherichia coli</i> O157:H7 EC4115    |
|                 |          | ecoo:ECRM13514_097_4 | <i>Escherichia coli</i>  | <i>Escherichia coli</i> O145:H28 RM13514 | 77     | 0.870      | 77      | PICI?      | 998523  | 1009658  | 11.1 | terL?                                             |
|                 |          | elo:EC042_1761       | <i>Escherichia coli</i>  | <i>Escherichia coli</i> O44:H18 O42      | 77     | 0.870      | 77      | PICI       | 1832521 | 1843545  | 11   |                                                   |
|                 |          | elr:ECO55CA74_06805  | <i>Escherichia coli</i>  | <i>Escherichia coli</i> O55:H7 RM12579   | 77     | 0.870      | 77      | PICI       | 1438165 | 1449376  | 11.2 | Same as <i>Escherichia coli</i> O157:H7 EC4115    |
| c1493           | DUF4222  | ecc:c1493            | <i>Escherichia coli</i>  | <i>Escherichia coli</i> O6:K2:H1 CFT073  | 99     | 1.000      |         | EcCICFT073 |         |          |      |                                                   |
|                 |          | ecoo:ECRM13514_097_5 | <i>Escherichia coli</i>  | <i>Escherichia coli</i> O145:H28 RM13514 | 99     | 0.939      | 99      | PICI?      | 998523  | 1009658  | 11.1 | terL?                                             |
|                 |          | eoh:ECO103_1241      | <i>Escherichia coli</i>  | <i>Escherichia coli</i> O103:H2 12009    | 99     | 0.939      | 99      | PICI       | 1325875 | 1336965  | 11.1 | Similar to <i>Escherichia coli</i> O157:H7 EC4115 |
|                 |          | ej:ECO26_1651        | <i>Escherichia coli</i>  | <i>Escherichia coli</i> O26:H11 11368    | 99     | 0.939      | 99      | PICI       | 1619447 | 1630554  | 11.1 | Same as <i>Escherichia coli</i> O157:H7 EC4115    |
|                 |          | ecf:ECH74115_1576    | <i>Escherichia coli</i>  | <i>Escherichia coli</i> O157:H7 EC4115   | 99     | 0.929      | 99      | PICI       | 1535498 | 15466717 | 11.2 |                                                   |
|                 |          | ecoh:ECRM13516_144_5 | <i>Escherichia coli</i>  | <i>Escherichia coli</i> O145:H28 RM13516 | 99     | 0.929      | 99      | PICI       | 1438775 | 1449995  | 11.2 | Same as <i>Escherichia coli</i> O157:H7 EC4115    |
|                 |          | eok:G2583_1395       | <i>Escherichia coli</i>  | <i>Escherichia coli</i> O55:H7 CB9615    | 99     | 0.929      | 99      | PICI       | 1444572 | 1455794  | 11.2 | Same as <i>Escherichia coli</i> O157:H7 EC4115    |
|                 |          | etw:ECSP_1496        | <i>Escherichia coli</i>  | <i>Escherichia coli</i> O157:H7 TW14359  | 99     | 0.929      | 99      | PICI       | 1535786 | 1547005  | 11.2 | Same as <i>Escherichia coli</i> O157:H7 EC4115    |

| EcCICFT073 gene | Function | Orthologs           | Species                  | Full name                                | Length | Similarity | Overlap | Element    | Start   | End     | Size | Comments                                       |
|-----------------|----------|---------------------|--------------------------|------------------------------------------|--------|------------|---------|------------|---------|---------|------|------------------------------------------------|
|                 |          | elo:EC042_1760      | <i>Escherichia coli</i>  | <i>Escherichia coli</i> O44:H18 O42      | 99     | 0.919      | 99      | PICI       | 1832521 | 1843545 | 11   |                                                |
|                 |          | eoi:ECO111_2919     | <i>Escherichia coli</i>  | <i>Escherichia coli</i> O111:H- 11128    | 99     | 0.909      | 99      | PICI       | 2855234 | 2864550 | 9.3  |                                                |
|                 |          | ecs:ECs1581         | <i>Escherichia coli</i>  | <i>Escherichia coli</i> O157:H7 Sakai    | 99     | 0.828      | 99      | PICI?      | 1594570 | 1610042 | 15.5 | Same as <i>Escherichia coli</i> O157:H7 EDL933 |
| c1495           | pri      | ecc:c1495           | <i>Escherichia coli</i>  | <i>Escherichia coli</i> O6:K2:H1 CFT073  | 584    | 1.000      |         | EcCICFT073 |         |         |      |                                                |
|                 |          | ecoo:ECRM13514_0976 | <i>Escherichia coli</i>  | <i>Escherichia coli</i> O145:H28 RM13514 | 584    | 0.986      | 584     | PICI?      | 998523  | 1009658 | 11.1 | terL?                                          |
|                 |          | ecoi:ECOPMV1_00890  | <i>Escherichia coli</i>  | <i>Escherichia coli</i> PMV-1            | 582    | 0.916      | 584     | PICI       | 919885  | 930438  | 10.5 |                                                |
|                 |          | eih:ECOK1_0889      | <i>Escherichia coli</i>  | <i>Escherichia coli</i> IHE3034          | 582    | 0.916      | 584     | PICI       | 920272  | 930825  | 10.5 | Same as <i>Escherichia coli</i> PMV-1          |
|                 |          | eoc:CE10_1217       | <i>Escherichia coli</i>  | <i>Escherichia coli</i> O7:K1 CE10       | 582    | 0.904      | 584     | PICI?      | 1260279 | 1274777 | 14.5 | HNH; terL                                      |
|                 |          | ect:ECIAI39_2020    | <i>Escherichia coli</i>  | <i>Escherichia coli</i> O7:K1 IAI39      | 582    | 0.904      | 584     | PICI?      | 2060161 | 2074688 | 14.5 | HNH; terL                                      |
|                 |          | sft:NCTC1_01191     | <i>Shigella flexneri</i> | <i>Shigella flexneri</i> NCTC1           | 582    | 0.904      | 584     | PICI?      | 1133207 | 1147945 | 14.7 | Similar to <i>Shigella flexneri</i> 2002017    |
|                 |          | sfl:SF1135          | <i>Shigella flexneri</i> | <i>Shigella flexneri</i> 301             | 582    | 0.902      | 584     | PICI?      | 1174763 | 1189501 | 14.7 | Similar to <i>Shigella flexneri</i> 2002017    |
|                 |          | sfs:SFyv_1688       | <i>Shigella flexneri</i> | <i>Shigella flexneri</i> Shi06HN006      | 582    | 0.902      | 584     | PICI?      | 1217313 | 1231688 | 14.4 | Same as <i>Shigella flexneri</i> 2002017       |
|                 |          | sfx:S1215           | <i>Shigella flexneri</i> | <i>Shigella flexneri</i> 2457T           | 582    | 0.902      | 584     | PICI?      | 1177656 | 1192394 | 14.7 | Similar to <i>Shigella flexneri</i> 2002017    |
|                 |          | sfv:SFV_1150        | <i>Shigella flexneri</i> | <i>Shigella flexneri</i> 8401            | 582    | 0.901      | 584     | PICI?      | 1192843 | 1208358 | 15.5 | Similar to <i>Shigella flexneri</i> 2002017    |
| c1496           |          | ecc:c1496           | <i>Escherichia coli</i>  | <i>Escherichia coli</i> O6:K2:H1 CFT073  | 85     | 1.000      |         | EcCICFT073 |         |         |      |                                                |
|                 |          | ecoi:ECOPMV1_00891  | <i>Escherichia coli</i>  | <i>Escherichia coli</i> PMV-1            | 85     | 1.000      | 85      | PICI       | 919885  | 930438  | 10.5 |                                                |
|                 |          | eih:ECOK1_0890      | <i>Escherichia coli</i>  | <i>Escherichia coli</i> IHE3034          | 85     | 1.000      | 85      | PICI       | 920272  | 930825  | 10.5 | Same as <i>Escherichia coli</i> PMV-1          |
|                 |          | elu:UM146_13205     | <i>Escherichia coli</i>  | <i>Escherichia coli</i> UM146            | 85     | 1.000      | 85      | PICI       | 2721434 | 2731984 | 10.5 | Same as <i>Escherichia coli</i> PMV-1          |
|                 |          | ect:ECIAI39_2019    | <i>Escherichia coli</i>  | <i>Escherichia coli</i> O7:K1 IAI39      | 85     | 0.988      | 85      | PICI?      | 2060161 | 2074688 | 14.5 | HNH; terL                                      |
|                 |          | eoc:CE10_1218       | <i>Escherichia coli</i>  | <i>Escherichia coli</i> O7:K1 CE10       | 85     | 0.988      | 85      | PICI?      | 1260279 | 1274777 | 14.5 | HNH; terL                                      |
|                 |          | ecm:EcSMS35_0947    | <i>Escherichia coli</i>  | <i>Escherichia coli</i> SMS-3-5          | 81     | 0.875      | 72      | PICI?      | 955625  | 970780  | 15.2 | HNH; terL                                      |
|                 |          | ssn:SSON_0875       | <i>Shigella sonnei</i>   | <i>Shigella sonnei</i> Ss046             | 81     | 0.875      | 72      | PICI       | 922309  | 936578  | 14.3 |                                                |
|                 |          | ej:ECO26_2320       | <i>Escherichia coli</i>  | <i>Escherichia coli</i> O26:H11 11368    | 81     | 0.861      | 72      | PICI?      | 2239126 | 2254011 | 14.9 | HNH; terL                                      |
|                 |          | eln:NRG857_05750    | <i>Escherichia coli</i>  | <i>Escherichia coli</i> O83:H1 NRG 857C  | 81     | 0.833      | 72      | Prophage?  |         |         |      | Chimera prophage & PICI                        |
|                 |          | sfe:SFxv_1293       | <i>Shigella flexneri</i> | <i>Shigella flexneri</i> 2002017         | 92     | 0.728      | 92      | PICI?      | 1232114 | 1246489 | 14.4 | HNH; terL                                      |
| c1497           | ssb      | ecc:c1497           | <i>Escherichia coli</i>  | <i>Escherichia coli</i> O6:K2:H1 CFT073  | 136    | 1.000      |         | EcCICFT073 |         |         |      |                                                |
|                 |          | ecq:ECED1_1784      | <i>Escherichia coli</i>  | <i>Escherichia coli</i> O81 ED1a         | 136    | 1.000      | 136     | PICI?      | 1739927 | 1756201 | 16.3 | HNH; terL                                      |
|                 |          | ece:Z1845           | <i>Escherichia coli</i>  | <i>Escherichia coli</i> O157:H7 EDL933   | 136    | 0.985      | 136     | PICI?      | 1678546 | 1694015 | 15.5 | HNH; terL                                      |
|                 |          | ecs:ECs1587         | <i>Escherichia coli</i>  | <i>Escherichia coli</i> O157:H7 Sakai    | 136    | 0.985      | 136     | PICI?      | 1594570 | 1610042 | 15.5 | Same as <i>Escherichia coli</i> O157:H7 EDL933 |
|                 |          | elx:CDCO157_1520    | <i>Escherichia coli</i>  | <i>Escherichia coli</i> O157:H7 Xuzhou21 | 136    | 0.985      | 136     | PICI?      | 1596512 | 1611982 | 15.5 | Same as <i>Escherichia coli</i> O157:H7 EDL933 |
|                 |          | ej:ECO26_2319       | <i>Escherichia coli</i>  | <i>Escherichia coli</i> O26:H11 11368    | 136    | 0.985      | 136     | PICI?      | 2239126 | 2254011 | 14.9 | HNH; terL                                      |

| EcCICFT073 gene | Function | Orthologs           | Species                 | Full name                                | Length | Similarity | Overlap | Element    | Start   | End      | Size | Comments                                          |
|-----------------|----------|---------------------|-------------------------|------------------------------------------|--------|------------|---------|------------|---------|----------|------|---------------------------------------------------|
|                 |          | ecoh:ECRM13516_1448 | <i>Escherichia coli</i> | <i>Escherichia coli</i> O145:H28 RM13516 | 136    | 0.978      | 136     | PICI       | 1438775 | 1449995  | 11.2 | Same as <i>Escherichia coli</i> O157:H7 EC4115    |
|                 |          | ecoo:ECRM13514_1492 | <i>Escherichia coli</i> | <i>Escherichia coli</i> O145:H28 RM13514 | 136    | 0.978      | 136     | PICI       | 1462244 | 1473465  | 11.2 | Same as <i>Escherichia coli</i> O157:H7 EC4115    |
|                 |          | elo:EC042_1757      | <i>Escherichia coli</i> | <i>Escherichia coli</i> O44:H18 O42      | 136    | 0.978      | 136     | PICI       | 1832521 | 1843545  | 11   |                                                   |
|                 |          | elr:ECO55CA74_06820 | <i>Escherichia coli</i> | <i>Escherichia coli</i> O55:H7 RM12579   | 136    | 0.978      | 136     | PICI       | 1438165 | 1449376  | 11.2 | Same as <i>Escherichia coli</i> O157:H7 EC4115    |
|                 |          | eoh:ECO103_1244     | <i>Escherichia coli</i> | <i>Escherichia coli</i> O103:H2 12009    | 136    | 0.978      | 136     | PICI       | 1325875 | 1336965  | 11.1 | Similar to <i>Escherichia coli</i> O157:H7 EC4115 |
| c1498           |          | ecc:c1498           | <i>Escherichia coli</i> | <i>Escherichia coli</i> O6:K2:H1 CFT073  | 68     | 1.000      |         | EcCICFT073 |         |          |      |                                                   |
|                 |          | ecq:ECED1_2650      | <i>Escherichia coli</i> | <i>Escherichia coli</i> O81 ED1a         | 68     | 0.971      | 68      | PICI       | 2568989 | 2580418  | 11.4 |                                                   |
|                 |          | ecoh:ECRM13516_1452 | <i>Escherichia coli</i> | <i>Escherichia coli</i> O145:H28 RM13516 | 68     | 0.971      | 68      | PICI       | 1438775 | 1449995  | 11.2 | Same as <i>Escherichia coli</i> O157:H7 EC4115    |
|                 |          | ecoo:ECRM13514_1496 | <i>Escherichia coli</i> | <i>Escherichia coli</i> O145:H28 RM13514 | 68     | 0.971      | 68      | PICI       | 1462244 | 1473465  | 11.2 | Same as <i>Escherichia coli</i> O157:H7 EC4115    |
|                 |          | ej:ECO26_1657       | <i>Escherichia coli</i> | <i>Escherichia coli</i> O26:H11 11368    | 68     | 0.971      | 68      | PICI       | 1619447 | 1630554  | 11.1 | Same as <i>Escherichia coli</i> O157:H7 EC4115    |
|                 |          | eoh:ECO103_1247     | <i>Escherichia coli</i> | <i>Escherichia coli</i> O103:H2 12009    | 68     | 0.956      | 68      | PICI       | 1325875 | 1336965  | 11.1 | Similar to <i>Escherichia coli</i> O157:H7 EC4115 |
|                 |          | elc:i14_0253        | <i>Escherichia coli</i> | <i>Escherichia coli</i> clone D i14      | 68     | 0.974      | 68      | PICI       | 249047  | 259688   | 10.6 |                                                   |
|                 |          | eld:i02_0253        | <i>Escherichia coli</i> | <i>Escherichia coli</i> clone D i2       | 68     | 0.974      | 68      | PICI       | 249047  | 259688   | 10.6 | Same as <i>Escherichia coli</i> clone D i14       |
|                 |          | ecoi:ECOPMV1_00893  | <i>Escherichia coli</i> | <i>Escherichia coli</i> PMV-1            | 68     | 0.676      | 68      | PICI       | 919885  | 930438   | 10.5 |                                                   |
|                 |          | eih:ECOK1_0892      | <i>Escherichia coli</i> | <i>Escherichia coli</i> IHE3034          | 68     | 0.676      | 68      | PICI       | 920272  | 930825   | 10.5 | Same as <i>Escherichia coli</i> PMV-1             |
|                 |          | elo:EC042_1754      | <i>Escherichia coli</i> | <i>Escherichia coli</i> O44:H18 O42      | 79     | 0.676      | 68      | PICI       | 1832521 | 1843545  | 11   |                                                   |
| c1499           | capsid   | ecc:c1499           | <i>Escherichia coli</i> | <i>Escherichia coli</i> O6:K2:H1 CFT073  | 351    | 1.000      |         | EcCICFT073 |         |          |      |                                                   |
|                 |          | ecoh:ECRM13516_1453 | <i>Escherichia coli</i> | <i>Escherichia coli</i> O145:H28 RM13516 | 351    | 0.966      | 350     | PICI       | 1438775 | 1449995  | 11.2 | Same as <i>Escherichia coli</i> O157:H7 EC4115    |
|                 |          | eoh:ECO103_1248     | <i>Escherichia coli</i> | <i>Escherichia coli</i> O103:H2 12009    | 351    | 0.966      | 350     | PICI       | 1325875 | 1336965  | 11.1 | Similar to <i>Escherichia coli</i> O157:H7 EC4115 |
|                 |          | ej:ECO26_1658       | <i>Escherichia coli</i> | <i>Escherichia coli</i> O26:H11 11368    | 351    | 0.966      | 350     | PICI       | 1619447 | 1630554  | 11.1 | Same as <i>Escherichia coli</i> O157:H7 EC4115    |
|                 |          | ecoo:ECRM13514_1497 | <i>Escherichia coli</i> | <i>Escherichia coli</i> O145:H28 RM13514 | 351    | 0.963      | 350     | PICI       | 1462244 | 1473465  | 11.2 | Same as <i>Escherichia coli</i> O157:H7 EC4115    |
|                 |          | ecf:ECH74115_1583   | <i>Escherichia coli</i> | <i>Escherichia coli</i> O157:H7 EC4115   | 351    | 0.969      | 350     | PICI       | 1535498 | 15466717 | 11.2 |                                                   |
|                 |          | elo:EC042_1753      | <i>Escherichia coli</i> | <i>Escherichia coli</i> O44:H18 O42      | 351    | 0.969      | 350     | PICI       | 1832521 | 1843545  | 11   |                                                   |
|                 |          | elr:ECO55CA74_06840 | <i>Escherichia coli</i> | <i>Escherichia coli</i> O55:H7 RM12579   | 351    | 0.969      | 350     | PICI       | 1438165 | 1449376  | 11.2 | Same as <i>Escherichia coli</i> O157:H7 EC4115    |
|                 |          | eok:G2583_1400      | <i>Escherichia coli</i> | <i>Escherichia coli</i> O55:H7 CB9615    | 351    | 0.969      | 350     | PICI       | 1444572 | 1455794  | 11.2 | Same as <i>Escherichia coli</i> O157:H7 EC4115    |
|                 |          | etw:ECSP_1503       | <i>Escherichia coli</i> | <i>Escherichia coli</i> O157:H7 TW14359  | 351    | 0.969      | 350     | PICI       | 1535786 | 1547005  | 11.2 | Same as <i>Escherichia coli</i> O157:H7 EC4115    |
|                 |          | sbo:SBO_2125        | <i>Shigella boydii</i>  | <i>Shigella boydii</i> Sb227             | 351    | 0.960      | 350     | PICI       | 2097873 | 2108560  | 10.7 |                                                   |
| c1500           | HDHD     | ecc:c1500           | <i>Escherichia coli</i> | <i>Escherichia coli</i> O6:K2:H1 CFT073  | 111    | 1.000      |         | EcCICFT073 |         |          |      |                                                   |
|                 |          | ecoi:ECOPMV1_00895  | <i>Escherichia coli</i> | <i>Escherichia coli</i> PMV-1            | 111    | 0.991      | 111     | PICI       | 919885  | 930438   | 10.5 |                                                   |
|                 |          | eih:ECOK1_0894      | <i>Escherichia coli</i> | <i>Escherichia coli</i> IHE3034          | 111    | 0.991      | 111     | PICI       | 920272  | 930825   | 10.5 | Same as <i>Escherichia coli</i> PMV-1             |
|                 |          | el:UM146_13185      | <i>Escherichia coli</i> | <i>Escherichia coli</i> UM146            | 111    | 0.991      | 111     | PICI       | 2721434 | 2731984  | 10.5 | Same as <i>Escherichia coli</i> PMV-1             |

| EcCICFT073 gene | Function | Orthologs              | Species                           | Full name                                                             | Length | Similarity | Overlap | Element    | Start   | End      | Size | Comments                                            |
|-----------------|----------|------------------------|-----------------------------------|-----------------------------------------------------------------------|--------|------------|---------|------------|---------|----------|------|-----------------------------------------------------|
|                 |          | ecf:ECH74115_1584      | <i>Escherichia coli</i>           | <i>Escherichia coli</i> O157:H7 EC4115                                | 111    | 0.982      | 111     | PICI       | 1535498 | 15466717 | 11.2 |                                                     |
|                 |          | elo:EC042_1752         | <i>Escherichia coli</i>           | <i>Escherichia coli</i> O44:H18 O42                                   | 111    | 0.982      | 111     | PICI       | 1832521 | 1843545  | 11   |                                                     |
|                 |          | elr:ECO55CA74_06845    | <i>Escherichia coli</i>           | <i>Escherichia coli</i> O55:H7 RM12579                                | 111    | 0.982      | 111     | PICI       | 1438165 | 1449376  | 11.2 | Same as <i>Escherichia coli</i> O157:H7 EC4115      |
|                 |          | eok:G2583_1401         | <i>Escherichia coli</i>           | <i>Escherichia coli</i> O55:H7 CB9615                                 | 111    | 0.982      | 111     | PICI       | 1444572 | 1455794  | 11.2 | Same as <i>Escherichia coli</i> O157:H7 EC4115      |
|                 |          | etw:ECSP_1504          | <i>Escherichia coli</i>           | <i>Escherichia coli</i> O157:H7 TW14359                               | 111    | 0.982      | 111     | PICI       | 1535786 | 1547005  | 11.2 | Same as <i>Escherichia coli</i> O157:H7 EC4115      |
|                 |          | ecq:ECED1_2652         | <i>Escherichia coli</i>           | <i>Escherichia coli</i> O81 ED1a                                      | 111    | 0.973      | 111     | PICI       | 2568989 | 2580418  | 11.4 |                                                     |
|                 |          | elc:i14_0255           | <i>Escherichia coli</i>           | <i>Escherichia coli</i> clone D i14                                   | 111    | 0.973      | 111     | PICI       | 249047  | 259688   | 10.6 |                                                     |
| c1501           |          | ecc:c1501              | <i>Escherichia coli</i>           | <i>Escherichia coli</i> O6:K2:H1 CFT073                               | 137    | 1.000      |         | EcCICFT073 |         |          |      |                                                     |
|                 |          | ecoi:ECOPMV1_00896     | <i>Escherichia coli</i>           | <i>Escherichia coli</i> PMV-1                                         | 137    | 0.993      | 137     | PICI       | 919885  | 930438   | 10.5 |                                                     |
|                 |          | eih:ECOK1_0895         | <i>Escherichia coli</i>           | <i>Escherichia coli</i> IHE3034                                       | 137    | 0.993      | 137     | PICI       | 920272  | 930825   | 10.5 | Same as <i>Escherichia coli</i> PMV-1               |
|                 |          | elU:UM146_13180        | <i>Escherichia coli</i>           | <i>Escherichia coli</i> UM146                                         | 137    | 0.993      | 137     | PICI       | 2721434 | 2731984  | 10.5 | Same as <i>Escherichia coli</i> PMV-1               |
|                 |          | eok:G2583_1402         | <i>Escherichia coli</i>           | <i>Escherichia coli</i> O55:H7 CB9615                                 | 137    | 0.971      | 137     | PICI       | 1444572 | 1455794  | 11.2 | Same as <i>Escherichia coli</i> O157:H7 EC4115      |
|                 |          | elr:ECO55CA74_06850    | <i>Escherichia coli</i>           | <i>Escherichia coli</i> O55:H7 RM12579                                | 137    | 0.964      | 137     | PICI       | 1438165 | 1449376  | 11.2 | Same as <i>Escherichia coli</i> O157:H7 EC4115      |
|                 |          | ecf:ECH74115_1585      | <i>Escherichia coli</i>           | <i>Escherichia coli</i> O157:H7 EC4115                                | 137    | 0.964      | 137     | PICI       | 1535498 | 15466717 | 11.2 |                                                     |
|                 |          | etw:ECSP_1505          | <i>Escherichia coli</i>           | <i>Escherichia coli</i> O157:H7 TW14359                               | 137    | 0.964      | 137     | PICI       | 1535786 | 1547005  | 11.2 | Same as <i>Escherichia coli</i> O157:H7 EC4115      |
|                 |          | ecoh:ECRM13516_1455    | <i>Escherichia coli</i>           | <i>Escherichia coli</i> O145:H28 RM13516                              | 137    | 0.942      | 137     | PICI       | 1438775 | 1449995  | 11.2 | Same as <i>Escherichia coli</i> O157:H7 EC4115      |
|                 |          | ecoo:ECRM13514_1499    | <i>Escherichia coli</i>           | <i>Escherichia coli</i> O145:H28 RM13514                              | 137    | 0.942      | 137     | PICI       | 1462244 | 1473465  | 11.2 | Same as <i>Escherichia coli</i> O157:H7 EC4115      |
|                 |          | eoh:ECO103_1250        | <i>Escherichia coli</i>           | <i>Escherichia coli</i> O103:H2 12009                                 | 137    | 0.942      | 137     | PICI       | 1325875 | 1336965  | 11.1 | Similar to <i>Escherichia coli</i> O157:H7 EC4115   |
| c1502           |          | ecc:c1502              | <i>Escherichia coli</i>           | <i>Escherichia coli</i> O6:K2:H1 CFT073                               | 60     | 1.000      |         | EcCICFT073 |         |          |      |                                                     |
|                 |          | sbo:SBO_2122           | <i>Shigella boydii</i>            | <i>Shigella boydii</i> Sb227                                          | 147    | 0.933      | 60      | PICI       | 2097873 | 2108560  | 10.7 |                                                     |
| c1503           |          | ecc:c1503              | <i>Escherichia coli</i>           | <i>Escherichia coli</i> O6:K2:H1 CFT073                               | 113    | 1.000      |         | EcCICFT073 |         |          |      |                                                     |
|                 |          | sbo:SBO_2121           | <i>Shigella boydii</i>            | <i>Shigella boydii</i> Sb227                                          | 113    | 1.000      | 113     | PICI       | 2097873 | 2108560  | 10.7 |                                                     |
|                 |          | elo:EC042_1750         | <i>Escherichia coli</i>           | <i>Escherichia coli</i> O44:H18 O42                                   | 113    | 0.982      | 113     | PICI       | 1832521 | 1843545  | 11   |                                                     |
|                 |          | aaw:AVL56_03045        | <i>Alteromonas addita</i>         | <i>Alteromonas addita</i> R10SW13                                     | 774    | 0.349      | 106     | No insert  |         |          |      |                                                     |
|                 |          | asp:AOR13_2906         | <i>Alteromonas addita</i>         | <i>Alteromonas stellipolaris</i> LMG 21856                            | 774    | 0.349      | 106     | No insert  |         |          |      |                                                     |
|                 |          | asq:AVL57_04270        | <i>Alteromonas addita</i>         | <i>Alteromonas stellipolaris</i> LMG 21861                            | 774    | 0.349      | 106     | No insert  |         |          |      |                                                     |
|                 |          | pte:PTT_18114          | <i>Pyrenophora teres</i>          | <i>Pyrenophora teres</i> f. <i>teres</i> 0-1                          | 380    | 0.318      | 88      |            |         |          |      | RefSeq (Assembly: <a href="#">GCA_000166005.1</a> ) |
|                 |          | bve:AK36_4596          | <i>Burkholderia vietnamiensis</i> | <i>Burkholderia vietnamiensis</i> LMG 10929                           | 402    | 0.321      | 81      | No insert  |         |          |      |                                                     |
|                 |          | miu:ABE85_20515        | <i>Mitsuaria</i>                  | <i>Mitsuaria</i> sp. 7                                                | 285    | 0.322      | 87      | No insert  |         |          |      |                                                     |
|                 |          | nda:Ndas_4923          | <i>Nocardiopsis dassonvillei</i>  | <i>Nocardiopsis dassonvillei</i> subsp. <i>dassonvillei</i> DSM 43111 | 768    | 0.308      | 117     | No insert  |         |          |      |                                                     |
|                 |          | spaa:SPAPADRAFT_153792 | <i>Spathaspora passalidarum</i>   | <i>Spathaspora passalidarum</i> NRRL Y-27907                          | 711    | 0.309      | 81      |            |         |          |      | RefSeq (Assembly: <a href="#">GCF_000223485.1</a> ) |



| EcCICFT073 gene | Function      | Orthologs                 | Species                       | Full name                                | Length                                  | Similarity | Overlap | Element    | Start      | End     | Size                                                | Comments                                            |
|-----------------|---------------|---------------------------|-------------------------------|------------------------------------------|-----------------------------------------|------------|---------|------------|------------|---------|-----------------------------------------------------|-----------------------------------------------------|
| c1504           |               | ecc:c1504                 | <i>Escherichia coli</i>       | <i>Escherichia coli</i> O6:K2:H1 CFT073  | 53                                      | 1.000      |         | EcCICFT073 |            |         |                                                     |                                                     |
|                 |               | ola:105353925             | <i>Oryzias latipes</i>        | <i>Oryzias latipes</i>                   | 372                                     | 0.372      | 42      |            |            |         |                                                     | RefSeq (Assembly: <a href="#">GCF_000313675.1</a> ) |
| c1505           |               | ecc:c1505                 | <i>Escherichia coli</i>       | <i>Escherichia coli</i> O6:K2:H1 CFT073  | 93                                      | 1.000      |         | EcCICFT073 |            |         |                                                     |                                                     |
|                 |               | sfe:SFxv_1307             | <i>Shigella flexneri</i>      | <i>Shigella flexneri</i> 2002017         | 93                                      | 0.914      | 93      | 1232114    | 1246489    | 14.4    | HNH;<br>terL                                        |                                                     |
|                 |               | sfl:SF1147                | <i>Shigella flexneri</i>      | <i>Shigella flexneri</i> 301             | 93                                      | 0.914      | 93      | PICI?      | 1174763    | 1189501 | 14.7                                                | Similar to <i>Shigella flexneri</i> 2002017         |
|                 |               | sfn:SFy_1654              | <i>Shigella flexneri</i>      | <i>Shigella flexneri</i> 2003036         | 93                                      | 0.914      | 93      | PICI?      | 1198620    | 1213000 | 14.4                                                | Same as <i>Shigella flexneri</i> 2002017            |
|                 |               | sfs:SFyv_1706             | <i>Shigella flexneri</i>      | <i>Shigella flexneri</i> Shi06HN006      | 93                                      | 0.914      | 93      | PICI?      | 1217313    | 1231688 | 14.4                                                | Same as <i>Shigella flexneri</i> 2002017            |
|                 |               | sft:NCTC1_01205           | <i>Shigella flexneri</i>      | <i>Shigella flexneri</i> NCTC1           | 93                                      | 0.914      | 93      | PICI?      | 1133207    | 1147945 | 14.7                                                | Similar to <i>Shigella flexneri</i> 2002017         |
|                 |               | sfv:SFV_1162              | <i>Shigella flexneri</i>      | <i>Shigella flexneri</i> 8401            | 93                                      | 0.914      | 93      | PICI?      | 1192843    | 1208358 | 15.5                                                | Similar to <i>Shigella flexneri</i> 2002017         |
|                 |               | sfx:S1229                 | <i>Shigella flexneri</i>      | <i>Shigella flexneri</i> 2457T           | 93                                      | 0.914      | 93      | PICI?      | 1177656    | 1192394 | 14.7                                                | Similar to <i>Shigella flexneri</i> 2002017         |
|                 |               | eih:ECOK1_0897            | <i>Escherichia coli</i>       | <i>Escherichia coli</i> IHE3034          | 93                                      | 0.914      | 93      | PICI       | 920272     | 930825  | 10.5                                                | Same as <i>Escherichia coli</i> PMV-1               |
|                 |               | elo:EC042_1749            | <i>Escherichia coli</i>       | <i>Escherichia coli</i> O44:H18 042      | 93                                      | 0.914      | 93      | PICI       | 1832521    | 1843545 | 11                                                  |                                                     |
|                 |               | sbo:SBO_2120              | <i>Shigella boydii</i>        | <i>Shigella boydii</i> Sb227             | 93                                      | 0.914      | 93      | PICI       | 2097873    | 2108560 | 10.7                                                |                                                     |
|                 | c1506         |                           | ecc:c1506                     | <i>Escherichia coli</i>                  | <i>Escherichia coli</i> O6:K2:H1 CFT073 | 145        | 1.000   |            | EcCICFT073 |         |                                                     |                                                     |
|                 |               | ecoi:ECOPMV1_00898        | <i>Escherichia coli</i>       | <i>Escherichia coli</i> PMV-1            | 145                                     | 0.936      | 140     | PICI       | 919885     | 930438  | 10.5                                                |                                                     |
|                 |               | elu:UM146_13170           | <i>Escherichia coli</i>       | <i>Escherichia coli</i> UM146            | 168                                     | 0.936      | 140     | PICI       | 2721434    | 2731984 | 10.5                                                | Same as <i>Escherichia coli</i> PMV-1               |
|                 |               | sbo:SBO_2119              | <i>Shigella boydii</i>        | <i>Shigella boydii</i> Sb227             | 145                                     | 0.929      | 140     | PICI       | 2097873    | 2108560 | 10.7                                                |                                                     |
|                 |               | ece:Z1856                 | <i>Escherichia coli</i>       | <i>Escherichia coli</i> O157:H7 EDL933   | 112                                     | 0.836      | 110     | PICI?      | 1678546    | 1694015 | 15.5                                                | HNH; terL                                           |
|                 |               | tbr:Tb10.70.3460          | <i>Trypanosoma brucei</i>     | <i>Trypanosoma brucei</i> brucei TREU927 | 2151                                    | 0.329      | 70      |            |            |         |                                                     | RefSeq (Assembly: <a href="#">GCF_000002445.1</a> ) |
|                 |               | mamo:A6B35_05040          | <i>Mesorhizobium amorphae</i> | <i>Mesorhizobium amorphae</i> CCNWGS0123 | 278                                     | 0.314      | 102     | No insert  |            |         |                                                     |                                                     |
|                 |               | apac:S7S_10755            | <i>Alcanivorax pacificus</i>  | <i>Alcanivorax pacificus</i> W11-5       | 223                                     | 0.318      | 66      | No insert  |            |         |                                                     |                                                     |
|                 |               | phi:102103469             | <i>Pseudopodoces humilis</i>  | <i>Pseudopodoces humilis</i>             | 172                                     | 0.380      | 79      |            |            |         |                                                     | RefSeq (Assembly: <a href="#">GCF_000331425.1</a> ) |
|                 |               | sbq:101031964             | <i>Saimiri boliviensis</i>    | <i>Saimiri boliviensis</i> boliviensis   | 1243                                    | 0.333      | 51      |            |            |         |                                                     | RefSeq (Assembly: <a href="#">GCF_000235385.1</a> ) |
|                 | cin:100186217 | <i>Ciona intestinalis</i> | <i>Ciona intestinalis</i>     | 2053                                     | 0.304                                   | 69         |         |            |            |         | RefSeq (Assembly: <a href="#">GCF_000224145.2</a> ) |                                                     |
| c1507           |               | ecc:c1507                 | <i>Escherichia coli</i>       | <i>Escherichia coli</i> O6:K2:H1 CFT073  | 46                                      | 1.000      |         | EcCICFT073 |            |         |                                                     | No matches in database (DB)                         |

**Table S3. EcCIO42 orthologies.**

| EcCIO42 gene    | Function                | Orthologs                     | Species                  | Full name                                | Length | Similarity | Overlap | Element | Start   | End                                   | Size | Comments                                          |
|-----------------|-------------------------|-------------------------------|--------------------------|------------------------------------------|--------|------------|---------|---------|---------|---------------------------------------|------|---------------------------------------------------|
| EC042_1767      | int                     | elo:EC042_1767                | <i>Escherichia coli</i>  | <i>Escherichia coli</i> O44:H18 O42      | 405    | 1.000      |         | EcCIO42 |         |                                       |      |                                                   |
|                 |                         | ej:ECO26_2328                 | <i>Escherichia coli</i>  | <i>Escherichia coli</i> O26:H11 11368    | 405    | 0.985      | 405     | PICI?   | 2239126 | 2254011                               | 14.9 | HNH; terL                                         |
|                 |                         | ecq:ECED1_1798                | <i>Escherichia coli</i>  | <i>Escherichia coli</i> O81 ED1a         | 409    | 0.983      | 405     | PICI?   | 1739927 | 1756201                               | 16.3 | HNH; terL                                         |
|                 |                         | ecf:ECH74115_1571             | <i>Escherichia coli</i>  | <i>Escherichia coli</i> O157:H7 EC4115   | 409    | 0.921      | 405     | PICI    | 1535498 | 15466717                              | 11.2 |                                                   |
|                 |                         | ecoh:ECRM13516_1440           | <i>Escherichia coli</i>  | <i>Escherichia coli</i> O145:H28 RM13516 | 409    | 0.921      | 405     | PICI    | 1438775 | 1449995                               | 11.2 | Same as <i>Escherichia coli</i> O157:H7 EC4115    |
|                 |                         | ecoo:ECRM13514_1484           | <i>Escherichia coli</i>  | <i>Escherichia coli</i> O145:H28 RM13514 | 409    | 0.921      | 405     | PICI    | 1462244 | 1473465                               | 11.2 | Same as <i>Escherichia coli</i> O157:H7 EC4115    |
|                 |                         | elr:ECO55CA74_06770           | <i>Escherichia coli</i>  | <i>Escherichia coli</i> O55:H7 RM12579   | 409    | 0.921      | 405     | PICI    | 1438165 | 1449376                               | 11.2 | Same as <i>Escherichia coli</i> O157:H7 EC4115    |
|                 |                         | eok:G2583_1387                | <i>Escherichia coli</i>  | <i>Escherichia coli</i> O55:H7 CB9615    | 416    | 0.921      | 405     | PICI    | 1444572 | 1455794                               | 11.2 | Same as <i>Escherichia coli</i> O157:H7 EC4115    |
|                 |                         | etw:ECSP_1490                 | <i>Escherichia coli</i>  | <i>Escherichia coli</i> O157:H7 TW14359  | 409    | 0.921      | 405     | PICI    | 1535786 | 1547005                               | 11.2 | Same as <i>Escherichia coli</i> O157:H7 EC4115    |
|                 |                         | ece:Z1835                     | <i>Escherichia coli</i>  | <i>Escherichia coli</i> O157:H7 EDL933   | 416    | 0.921      | 405     | PICI?   | 1678546 | 1694015                               | 15.5 | HNH; terL                                         |
|                 |                         | ecs:ECs1574                   | <i>Escherichia coli</i>  | <i>Escherichia coli</i> O157:H7 Sakai    | 409    | 0.921      | 405     | PICI?   | 1594570 | 1610042                               | 15.5 | Same as <i>Escherichia coli</i> O157:H7 EDL933    |
|                 |                         | elx:CDCO157_1506              | <i>Escherichia coli</i>  | <i>Escherichia coli</i> O157:H7 Xuzhou21 | 409    | 0.921      | 405     | PICI?   | 1596512 | 1611982                               | 15.5 | Same as <i>Escherichia coli</i> O157:H7 EDL933    |
|                 |                         | sfe:SFxv_1284                 | <i>Shigella flexneri</i> | <i>Shigella flexneri</i> 2002017         | 416    | 0.921      | 405     | PICI?   | 1232114 | 1246489                               | 14.4 | HNH; terL                                         |
|                 |                         | sfn:SFy_1623                  | <i>Shigella flexneri</i> | <i>Shigella flexneri</i> 2003036         | 416    | 0.921      | 405     | PICI?   | 1198620 | 1213000                               | 14.4 | Same as <i>Shigella flexneri</i> 2002017          |
|                 |                         | sfs:SFyv_1675                 | <i>Shigella flexneri</i> | <i>Shigella flexneri</i> Shi06HN006      | 416    | 0.921      | 405     | PICI?   | 1217313 | 1231688                               | 14.4 | Same as <i>Shigella flexneri</i> 2002017          |
|                 |                         | sft:NCTC1_01185               | <i>Shigella flexneri</i> | <i>Shigella flexneri</i> NCTC1           | 409    | 0.921      | 405     | PICI?   | 1133207 | 1147945                               | 14.7 | Similar to <i>Shigella flexneri</i> 2002017       |
|                 |                         | sfx:S1211                     | <i>Shigella flexneri</i> | <i>Shigella flexneri</i> 2457T           | 409    | 0.921      | 405     | PICI?   | 1177656 | 1192394                               | 14.7 | Similar to <i>Shigella flexneri</i> 2002017       |
|                 |                         | ect:ECIAI39_2027              | <i>Escherichia coli</i>  | <i>Escherichia coli</i> O7:K1 IAI39      | 416    | 0.919      | 405     | PICI?   | 2060161 | 2074688                               | 14.5 | HNH; terL                                         |
|                 |                         | sfv:SFV_1147                  | <i>Shigella flexneri</i> | <i>Shigella flexneri</i> 8401            | 416    | 0.919      | 405     | PICI?   | 1192843 | 1208358                               | 15.5 | Similar to <i>Shigella flexneri</i> 2002017       |
|                 |                         | eoc:CE10_1211                 | <i>Escherichia coli</i>  | <i>Escherichia coli</i> O7:K1 CE10       | 409    | 0.911      | 405     | PICI?   | 1260279 | 1274777                               | 14.5 | HNH; terL                                         |
|                 |                         | eoh:ECO103_1236               | <i>Escherichia coli</i>  | <i>Escherichia coli</i> O103:H2 12009    | 415    | 0.909      | 405     | PICI    | 1325875 | 1336965                               | 11.1 | Similar to <i>Escherichia coli</i> O157:H7 EC4115 |
|                 |                         | ecoi:ECOPMV1_00884            | <i>Escherichia coli</i>  | <i>Escherichia coli</i> PMV-1            | 412    | 0.754      | 399     | PICI    | 919885  | 930438                                | 10.5 |                                                   |
|                 |                         | eih:ECOK1_0883                | <i>Escherichia coli</i>  | <i>Escherichia coli</i> IHE3034          | 412    | 0.754      | 399     | PICI    | 920272  | 930825                                | 10.5 | Same as <i>Escherichia coli</i> PMV-1             |
| elu:UM146_13240 | <i>Escherichia coli</i> | <i>Escherichia coli</i> UM146 | 412                      | 0.754                                    | 399    | PICI       | 2721434 | 2731984 | 10.5    | Same as <i>Escherichia coli</i> PMV-1 |      |                                                   |
| EC042_1766      | alpA                    | elo:EC042_1766                | <i>Escherichia coli</i>  | <i>Escherichia coli</i> O44:H18 O42      | 62     | 1.000      |         | EcCIO42 |         |                                       |      |                                                   |
|                 |                         | ect:ECIAI39_2026              | <i>Escherichia coli</i>  | <i>Escherichia coli</i> O7:K1 IAI39      | 62     | 1.000      | 62      | PICI?   | 2060161 | 2074688                               | 14.5 | HNH; terL                                         |
|                 |                         | elr:ECO55CA74_06775           | <i>Escherichia coli</i>  | <i>Escherichia coli</i> O55:H7 RM12579   | 62     | 1.000      | 62      | PICI    | 1438165 | 1449376                               | 11.2 | Same as <i>Escherichia coli</i> O157:H7 EC4115    |
|                 |                         | elx:CDCO157_1507              | <i>Escherichia coli</i>  | <i>Escherichia coli</i> O157:H7 Xuzhou21 | 62     | 1.000      | 62      | PICI?   | 1596512 | 1611982                               | 15.5 | Same as <i>Escherichia coli</i> O157:H7 EDL933    |
|                 |                         | eok:G2583_1388                | <i>Escherichia coli</i>  | <i>Escherichia coli</i> O55:H7 CB9615    | 62     | 1.000      | 62      | PICI    | 1444572 | 1455794                               | 11.2 | Same as <i>Escherichia coli</i> O157:H7 EC4115    |
|                 |                         | etw:ECSP_1491                 | <i>Escherichia coli</i>  | <i>Escherichia coli</i> O157:H7 TW14359  | 62     | 1.000      | 62      | PICI    | 1535786 | 1547005                               | 11.2 | Same as <i>Escherichia coli</i> O157:H7 EC4115    |
|                 |                         | ecq:ECED1_1797                | <i>Escherichia coli</i>  | <i>Escherichia coli</i> O81 ED1a         | 62     | 0.984      | 62      | PICI?   | 1739927 | 1756201                               | 16.3 | HNH; terL                                         |
|                 |                         | eoh:ECO103_1237               | <i>Escherichia coli</i>  | <i>Escherichia coli</i> O103:H2 12009    | 106    | 0.984      | 62      | PICI    | 1325875 | 1336965                               | 11.1 | Similar to <i>Escherichia coli</i> O157:H7 EC4115 |

| EcCIO42 gene | Function | Orthologs            | Species                      | Full name                                | Length | Similarity | Overlap | Element         | Start   | End      | Size | Comments                                          |
|--------------|----------|----------------------|------------------------------|------------------------------------------|--------|------------|---------|-----------------|---------|----------|------|---------------------------------------------------|
|              |          | eoj:ECO26_1647       | <i>Escherichia coli</i>      | <i>Escherichia coli</i> O26:H11 11368    | 89     | 0.984      | 62      | PICI            | 1619447 | 1630554  | 11.1 | Same as <i>Escherichia coli</i> O157:H7 EC4115    |
|              |          | ecm:EcSMS35_094_1    | <i>Escherichia coli</i>      | <i>Escherichia coli</i> SMS-3-5          | 74     | 0.741      | 54      | PICI?           | 955625  | 970780   | 15.2 | HNH; terL                                         |
|              |          | ddd:Dda3937_01590    | <i>Dickeya dadantii</i>      | <i>Dickeya dadantii</i> 3937             | 86     | 0.698      | 53      | PICI?           | 296519  | 307403   | 10.8 | tail protein                                      |
|              |          | ecoi:ECOPMV1_008_85  | <i>Escherichia coli</i>      | <i>Escherichia coli</i> PMV-1            | 69     | 0.678      | 56      | PICI            | 919885  | 930438   | 10.5 |                                                   |
|              |          | ecoo:ECRM13514_0_968 | <i>Escherichia coli</i>      | <i>Escherichia coli</i> O145:H28 RM13514 | 74     | 0.704      | 54      | PICI?           | 998523  | 1009658  | 11.1 | terL?                                             |
|              |          | eih:ECOK1_0884       | <i>Escherichia coli</i>      | <i>Escherichia coli</i> IHE3034          | 69     | 0.679      | 56      | PICI            | 920272  | 930825   | 10.5 | Same as <i>Escherichia coli</i> PMV-1             |
|              |          | elu:UM146_13235      | <i>Escherichia coli</i>      | <i>Escherichia coli</i> UM146            | 69     | 0.679      | 56      | PICI            | 2721434 | 2731984  | 10.5 | Same as <i>Escherichia coli</i> PMV-1             |
|              |          | eas:Entas_3977       | <i>Enterobacter asburiae</i> | <i>Enterobacter asburiae</i> LF7a        | 69     | 0.660      | 53      | PICI?           | 4253162 | 4268649  | 15.5 | terL                                              |
|              |          | raa:Q7S_08695        | <i>Rahnella aquatilis</i>    | <i>Rahnella aquatilis</i> HX2            | 100    | 0.654      | 52      | Phage           |         |          |      |                                                   |
|              |          | sbc:SbBS512_E218_6   | <i>Shigella boydii</i>       | <i>Shigella boydii</i> CDC 3083-94       | 85     | 0.556      | 54      | Defective PICI? |         |          |      | Only an <i>int</i> fragment, <i>alpA</i> ...      |
| EC042_1765   |          | elo:EC042_1765       | <i>Escherichia coli</i>      | <i>Escherichia coli</i> O44:H18 042      | 263    | 1.000      |         | EcCIO42         |         |          |      |                                                   |
|              |          | eoh:ECO103_1238      | <i>Escherichia coli</i>      | <i>Escherichia coli</i> O103:H2 12009    | 342    | 0.738      | 260     | PICI            | 1325875 | 1336965  | 11.1 | Similar to <i>Escherichia coli</i> O157:H7 EC4115 |
|              |          | eoj:ECO26_1648       | <i>Escherichia coli</i>      | <i>Escherichia coli</i> O26:H11 11368    | 342    | 0.738      | 260     | PICI            | 1619447 | 1630554  | 11.1 | Same as <i>Escherichia coli</i> O157:H7 EC4115    |
|              |          | ecs:ECs1576          | <i>Escherichia coli</i>      | <i>Escherichia coli</i> O157:H7 Sakai    | 247    | 0.662      | 269     | PICI?           | 1594570 | 1610042  | 15.5 | Same as <i>Escherichia coli</i> O157:H7 EDL933    |
|              |          | elx:CDCO157_1508     | <i>Escherichia coli</i>      | <i>Escherichia coli</i> O157:H7 Xuzhou21 | 247    | 0.662      | 269     | PICI?           | 1596512 | 1611982  | 15.5 | Same as <i>Escherichia coli</i> O157:H7 EDL933    |
|              |          | ecf:ECH74115_1572    | <i>Escherichia coli</i>      | <i>Escherichia coli</i> O157:H7 EC4115   | 314    | 0.686      | 236     | PICI            | 1535498 | 15466717 | 11.2 |                                                   |
|              |          | ecoh:ECRM13516_1_441 | <i>Escherichia coli</i>      | <i>Escherichia coli</i> O145:H28 RM13516 | 314    | 0.686      | 236     | PICI            | 1438775 | 1449995  | 11.2 | Same as <i>Escherichia coli</i> O157:H7 EC4115    |
|              |          | ecoo:ECRM13514_1_485 | <i>Escherichia coli</i>      | <i>Escherichia coli</i> O145:H28 RM13514 | 314    | 0.686      | 236     | PICI            | 1462244 | 1473465  | 11.2 | Same as <i>Escherichia coli</i> O157:H7 EC4115    |
|              |          | eok:G2583_1390       | <i>Escherichia coli</i>      | <i>Escherichia coli</i> O55:H7 CB9615    | 314    | 0.700      | 233     | PICI            | 1444572 | 1455794  | 11.2 | Same as <i>Escherichia coli</i> O157:H7 EC4115    |
|              |          | etw:ECSP_1492        | <i>Escherichia coli</i>      | <i>Escherichia coli</i> O157:H7 TW14359  | 314    | 0.700      | 233     | PICI            | 1535786 | 1547005  | 11.2 | Same as <i>Escherichia coli</i> O157:H7 EC4115    |
|              |          | ect:ECIAI39_2024     | <i>Escherichia coli</i>      | <i>Escherichia coli</i> O7:K1 IAI39      | 353    | 0.546      | 273     | PICI?           | 2060161 | 2074688  | 14.5 | HNH; terL                                         |
| EC042_1764   |          | elo:EC042_1764       | <i>Escherichia coli</i>      | <i>Escherichia coli</i> O44:H18 042      | 65     | 1.000      |         | EcCIO42         |         |          |      |                                                   |
|              |          | ecf:ECH74115_1572    | <i>Escherichia coli</i>      | <i>Escherichia coli</i> O157:H7 EC4115   | 314    | 1.000      | 65      | PICI            | 1535498 | 15466717 | 11.2 |                                                   |
|              |          | ecoh:ECRM13516_1_441 | <i>Escherichia coli</i>      | <i>Escherichia coli</i> O145:H28 RM13516 | 314    | 1.000      | 65      | PICI            | 1438775 | 1449995  | 11.2 | Same as <i>Escherichia coli</i> O157:H7 EC4115    |
|              |          | ecoo:ECRM13514_1_485 | <i>Escherichia coli</i>      | <i>Escherichia coli</i> O145:H28 RM13514 | 314    | 1.000      | 65      | PICI            | 1462244 | 1473465  | 11.2 | Same as <i>Escherichia coli</i> O157:H7 EC4115    |
|              |          | elr:ECO55CA74_06_785 | <i>Escherichia coli</i>      | <i>Escherichia coli</i> O55:H7 RM12579   | 109    | 1.000      | 65      | PICI            | 1438165 | 1449376  | 11.2 | Same as <i>Escherichia coli</i> O157:H7 EC4115    |
|              |          | eok:G2583_1390       | <i>Escherichia coli</i>      | <i>Escherichia coli</i> O55:H7 CB9615    | 314    | 1.000      | 65      | PICI            | 1444572 | 1455794  | 11.2 | Same as <i>Escherichia coli</i> O157:H7 EC4115    |
|              |          | etw:ECSP_1492        | <i>Escherichia coli</i>      | <i>Escherichia coli</i> O157:H7 TW14359  | 314    | 1.000      | 65      | PICI            | 1535786 | 1547005  | 11.2 | Same as <i>Escherichia coli</i> O157:H7 EC4115    |
|              |          | ecs:ECs1577          | <i>Escherichia coli</i>      | <i>Escherichia coli</i> O157:H7 Sakai    | 65     | 0.953      | 64      | PICI?           | 1594570 | 1610042  | 15.5 | Same as <i>Escherichia coli</i> O157:H7 EDL933    |
|              |          | elx:CDCO157_1510     | <i>Escherichia coli</i>      | <i>Escherichia coli</i> O157:H7 Xuzhou21 | 65     | 0.953      | 64      | PICI?           | 1596512 | 1611982  | 15.5 | Same as <i>Escherichia coli</i> O157:H7 EDL933    |
|              |          | sbc:SbBS512_E218_4   | <i>Shigella boydii</i>       | <i>Shigella boydii</i> CDC 3083-94       | 329    | 0.952      | 63      | Defective PICI? |         |          |      | Only an <i>int</i> fragment, <i>alpA</i> ...      |
|              |          | sfe:SFxv_1287        | <i>Shigella flexneri</i>     | <i>Shigella flexneri</i> 2002017         | 100    | 0.986      | 60      | PICI?           | 1232114 | 1246489  | 14.4 | HNH; terL                                         |

| EcCIO42 gene | Function | Orthologs           | Species                           | Full name                                                  | Length | Similarity | Overlap | Element   | Start   | End      | Size | Comments                                          |
|--------------|----------|---------------------|-----------------------------------|------------------------------------------------------------|--------|------------|---------|-----------|---------|----------|------|---------------------------------------------------|
|              |          | sft:NCTC1_01187     | <i>Shigella flexneri</i>          | <i>Shigella flexneri</i> NCTC1                             | 66     | 0.986      | 60      | PICI?     | 1133207 | 1147945  | 14.7 | Similar to <i>Shigella flexneri</i> 2002017       |
|              |          | sfx:S1212           | <i>Shigella flexneri</i>          | <i>Shigella flexneri</i> 2457T                             | 100    | 0.986      | 60      | PICI?     | 1177656 | 1192394  | 14.7 | Similar to <i>Shigella flexneri</i> 2002017       |
|              |          | eoj:ECO26_3107      | <i>Escherichia coli</i>           | <i>Escherichia coli</i> O26:H11 11368                      | 186    | 0.810      | 58      | PICI      | 3041660 | 3050231  | 8.5  | Similar to <i>Escherichia coli</i> O111:H-11128   |
| EC042_1763   |          | elo:EC042_1763      | <i>Escherichia coli</i>           | <i>Escherichia coli</i> O44:H18 042                        | 70     | 1.000      |         | EcCIO42   |         |          |      |                                                   |
|              |          | ecf:ECH74115_1573   | <i>Escherichia coli</i>           | <i>Escherichia coli</i> O157:H7 EC4115                     | 70     | 1.000      | 70      | PICI      | 1535498 | 15466717 | 11.2 |                                                   |
|              |          | ecoh:ECRM13516_1442 | <i>Escherichia coli</i>           | <i>Escherichia coli</i> O145:H28 RM13516                   | 70     | 1.000      | 70      | PICI      | 1438775 | 1449995  | 11.2 | Same as <i>Escherichia coli</i> O157:H7 EC4115    |
|              |          | ecoo:ECRM13514_1486 | <i>Escherichia coli</i>           | <i>Escherichia coli</i> O145:H28 RM13514                   | 70     | 1.000      | 70      | PICI      | 1462244 | 1473465  | 11.2 | Same as <i>Escherichia coli</i> O157:H7 EC4115    |
|              |          | elr:ECO55CA74_06790 | <i>Escherichia coli</i>           | <i>Escherichia coli</i> O55:H7 RM12579                     | 70     | 1.000      | 70      | PICI      | 1438165 | 1449376  | 11.2 | Same as <i>Escherichia coli</i> O157:H7 EC4115    |
|              |          | eok:G2583_1391      | <i>Escherichia coli</i>           | <i>Escherichia coli</i> O55:H7 CB9615                      | 70     | 1.000      | 70      | PICI      | 1444572 | 1455794  | 11.2 | Same as <i>Escherichia coli</i> O157:H7 EC4115    |
|              |          | etw:ECSP_1493       | <i>Escherichia coli</i>           | <i>Escherichia coli</i> O157:H7 TW14359                    | 70     | 1.000      | 70      | PICI      | 1535786 | 1547005  | 11.2 | Same as <i>Escherichia coli</i> O157:H7 EC4115    |
|              |          | eck:EC55989_0274    | <i>Escherichia coli</i>           | <i>Escherichia coli</i> 55989                              | 121    | 0.661      | 59      | PICI      | 296286  | 311648   | 15.3 |                                                   |
|              |          | esl:O3K_20150       | <i>Escherichia coli</i>           | <i>Escherichia coli</i> O104:H4 2011C-3493                 | 121    | 0.661      | 59      | Prophage? |         |          |      | Chimera prophage & PICI                           |
|              |          | eab:ECABU_c40900    | <i>Escherichia coli</i>           | <i>Escherichia coli</i> ABU 83972                          | 118    | 0.627      | 59      | PICI?     | 4152946 | 4166644  | 13.7 | terL?                                             |
|              |          | pcv:BCS7_08090      | <i>Pectobacterium carotovorum</i> | <i>Pectobacterium carotovorum</i> subsp. <i>odoriferum</i> | 69     | 0.351      | 57      | PICI      | 1837956 | 1854875  | 16.9 |                                                   |
| EC042_1762   |          | elo:EC042_1762      | <i>Escherichia coli</i>           | <i>Escherichia coli</i> O44:H18 042                        | 155    | 1.000      |         | EcCIO42   |         |          |      |                                                   |
|              |          | ecoh:ECRM13516_1443 | <i>Escherichia coli</i>           | <i>Escherichia coli</i> O145:H28 RM13516                   | 154    | 0.994      | 155     | PICI      | 1438775 | 1449995  | 11.2 | Same as <i>Escherichia coli</i> O157:H7 EC4115    |
|              |          | ecoo:ECRM13514_1487 | <i>Escherichia coli</i>           | <i>Escherichia coli</i> O145:H28 RM13514                   | 154    | 0.994      | 155     | PICI      | 1462244 | 1473465  | 11.2 | Same as <i>Escherichia coli</i> O157:H7 EC4115    |
|              |          | etw:ECSP_1494       | <i>Escherichia coli</i>           | <i>Escherichia coli</i> O157:H7 TW14359                    | 154    | 0.994      | 155     | PICI      | 1535786 | 1547005  | 11.2 | Same as <i>Escherichia coli</i> O157:H7 EC4115    |
|              |          | eoj:ECO26_1649      | <i>Escherichia coli</i>           | <i>Escherichia coli</i> O26:H11 11368                      | 154    | 0.942      | 155     | PICI      | 1619447 | 1630554  | 11.1 | Same as <i>Escherichia coli</i> O157:H7 EC4115    |
|              |          | eoh:ECO103_1239     | <i>Escherichia coli</i>           | <i>Escherichia coli</i> O103:H2 12009                      | 154    | 0.935      | 155     | PICI      | 1325875 | 1336965  | 11.1 | Similar to <i>Escherichia coli</i> O157:H7 EC4115 |
|              |          | sbo:SBO_2132        | <i>Escherichia coli</i>           | <i>Shigella boydii</i> Sb227                               | 93     | 0.988      | 80      | PICI      | 2097873 | 2108560  | 10.7 |                                                   |
|              |          | eoi:ECO111_2917     | <i>Escherichia coli</i>           | <i>Escherichia coli</i> O111:H- 11128                      | 77     | 1.000      | 77      | PICI      | 2855234 | 2864550  | 9.3  |                                                   |
|              |          | eok:G2583_1393      | <i>Escherichia coli</i>           | <i>Escherichia coli</i> O55:H7 CB9615                      | 77     | 1.000      | 77      | PICI      | 1444572 | 1455794  | 11.2 | Same as <i>Escherichia coli</i> O157:H7 EC4115    |
|              |          | ecc:c1491           | <i>Escherichia coli</i>           | <i>Escherichia coli</i> O6:K2:H1 CFT073                    | 79     | 0.855      | 76      | PICI      | 1377749 | 1389210  | 11.4 |                                                   |
|              |          | elc:i14_0247        | <i>Escherichia coli</i>           | <i>Escherichia coli</i> clone D i14                        | 78     | 0.836      | 73      | PICI      | 249047  | 259688   | 10.6 |                                                   |
| EC042_1761   |          | elo:EC042_1761      | <i>Escherichia coli</i>           | <i>Escherichia coli</i> O44:H18 042                        | 77     | 1.000      |         | EcCIO42   |         |          |      |                                                   |
|              |          | ecf:ECH74115_1575   | <i>Escherichia coli</i>           | <i>Escherichia coli</i> O157:H7 EC4115                     | 77     | 1.000      | 77      | PICI      | 1535498 | 15466717 | 11.2 |                                                   |
|              |          | ecoh:ECRM13516_1444 | <i>Escherichia coli</i>           | <i>Escherichia coli</i> O145:H28 RM13516                   | 77     | 1.000      | 77      | PICI      | 1438775 | 1449995  | 11.2 | Same as <i>Escherichia coli</i> O157:H7 EC4115    |
|              |          | ecoo:ECRM13514_0974 | <i>Escherichia coli</i>           | <i>Escherichia coli</i> O145:H28 RM13514                   | 77     | 1.000      | 77      | PICI?     | 998523  | 1009658  | 11.1 | terL?                                             |
|              |          | elr:ECO55CA74_06805 | <i>Escherichia coli</i>           | <i>Escherichia coli</i> O55:H7 RM12579                     | 77     | 1.000      | 77      | PICI      | 1438165 | 1449376  | 11.2 | Same as <i>Escherichia coli</i> O157:H7 EC4115    |
|              |          | eok:G2583_1394      | <i>Escherichia coli</i>           | <i>Escherichia coli</i> O55:H7 CB9615                      | 77     | 1.000      | 77      | PICI      | 1444572 | 1455794  | 11.2 | Same as <i>Escherichia coli</i> O157:H7 EC4115    |

| EcCIO42 gene | Function | Orthologs           | Species                  | Full name                                | Length | Similarity | Overlap | Element | Start   | End      | Size | Comments                                          |
|--------------|----------|---------------------|--------------------------|------------------------------------------|--------|------------|---------|---------|---------|----------|------|---------------------------------------------------|
|              |          | etw:ECSP_1495       | <i>Escherichia coli</i>  | <i>Escherichia coli</i> O157:H7 TW14359  | 77     | 1.000      | 77      | PICI    | 1535786 | 1547005  | 11.2 | Same as <i>Escherichia coli</i> O157:H7 EC4115    |
|              |          | eoh:ECO103_1240     | <i>Escherichia coli</i>  | <i>Escherichia coli</i> O103:H2 12009    | 77     | 0.974      | 77      | PICI    | 1325875 | 1336965  | 11.1 | Similar to <i>Escherichia coli</i> O157:H7 EC4115 |
|              |          | ej:ECO26_1650       | <i>Escherichia coli</i>  | <i>Escherichia coli</i> O26:H11 11368    | 77     | 0.974      | 77      | PICI    | 1619447 | 1630554  | 11.1 | Same as <i>Escherichia coli</i> O157:H7 EC4115    |
|              |          | sfe:SFxv_1289       | <i>Shigella flexneri</i> | <i>Shigella flexneri</i> 2002017         | 77     | 0.974      | 77      | PICI?   | 1232114 | 1246489  | 14.4 | HNH; terL                                         |
|              |          | sft:SF1133a         | <i>Shigella flexneri</i> | <i>Shigella flexneri</i> 301             | 77     | 0.974      | 77      | PICI?   | 1174763 | 1189501  | 14.7 | Similar to <i>Shigella flexneri</i> 2002017       |
|              |          | sfn:SFy_1629        | <i>Shigella flexneri</i> | <i>Shigella flexneri</i> 2003036         | 77     | 0.974      | 77      | PICI?   | 1198620 | 1213000  | 14.4 | Same as <i>Shigella flexneri</i> 2002017          |
|              |          | sfs:SFyv_1682       | <i>Shigella flexneri</i> | <i>Shigella flexneri</i> Shi06HN006      | 77     | 0.974      | 77      | PICI?   | 1217313 | 1231688  | 14.4 | Same as <i>Shigella flexneri</i> 2002017          |
|              |          | sft:NCTC1_01189     | <i>Shigella flexneri</i> | <i>Shigella flexneri</i> NCTC1           | 77     | 0.974      | 77      | PICI?   | 1133207 | 1147945  | 14.7 | Similar to <i>Shigella flexneri</i> 2002017       |
|              |          | ecc:c1492           | <i>Escherichia coli</i>  | <i>Escherichia coli</i> O6:K2:H1 CFT073  | 77     | 0.870      | 77      | PICI    | 1377749 | 1389210  | 11.4 |                                                   |
|              |          | eoi:ECO111_2918     | <i>Escherichia coli</i>  | <i>Escherichia coli</i> O111:H- 11128    | 77     | 0.766      | 77      | PICI    | 2855234 | 2864550  | 9.3  |                                                   |
| EC042_1760   |          | elo:EC042_1760      | <i>Escherichia coli</i>  | <i>Escherichia coli</i> O44:H18 042      | 99     | 1.000      |         | EcCIO42 |         |          |      |                                                   |
|              |          | ecf:ECH74115_1576   | <i>Escherichia coli</i>  | <i>Escherichia coli</i> O157:H7 EC4115   | 99     | 0.990      | 99      | PICI    | 1535498 | 15466717 | 11.2 |                                                   |
|              |          | ecoh:ECRM13516_1445 | <i>Escherichia coli</i>  | <i>Escherichia coli</i> O145:H28 RM13516 | 99     | 0.990      | 99      | PICI    | 1438775 | 1449995  | 11.2 | Same as <i>Escherichia coli</i> O157:H7 EC4115    |
|              |          | ecoo:ECRM13514_1489 | <i>Escherichia coli</i>  | <i>Escherichia coli</i> O145:H28 RM13514 | 99     | 0.990      | 99      | PICI    | 1462244 | 1473465  | 11.2 | Same as <i>Escherichia coli</i> O157:H7 EC4115    |
|              |          | eok:G2583_1395      | <i>Escherichia coli</i>  | <i>Escherichia coli</i> O55:H7 CB9615    | 99     | 0.990      | 99      | PICI    | 1444572 | 1455794  | 11.2 | Same as <i>Escherichia coli</i> O157:H7 EC4115    |
|              |          | etw:ECSP_1496       | <i>Escherichia coli</i>  | <i>Escherichia coli</i> O157:H7 TW14359  | 99     | 0.990      | 99      | PICI    | 1535786 | 1547005  | 11.2 | Same as <i>Escherichia coli</i> O157:H7 EC4115    |
|              |          | eoh:ECO103_1241     | <i>Escherichia coli</i>  | <i>Escherichia coli</i> O103:H2 12009    | 99     | 0.980      | 99      | PICI    | 1325875 | 1336965  | 11.1 | Similar to <i>Escherichia coli</i> O157:H7 EC4115 |
|              |          | ej:ECO26_1651       | <i>Escherichia coli</i>  | <i>Escherichia coli</i> O26:H11 11368    | 99     | 0.980      | 99      | PICI    | 1619447 | 1630554  | 11.1 | Same as <i>Escherichia coli</i> O157:H7 EC4115    |
|              |          | eoi:ECO111_2919     | <i>Escherichia coli</i>  | <i>Escherichia coli</i> O111:H- 11128    | 99     | 0.949      | 99      | PICI    | 2855234 | 2864550  | 9.3  |                                                   |
|              |          | ecc:c1493           | <i>Escherichia coli</i>  | <i>Escherichia coli</i> O6:K2:H1 CFT073  | 99     | 0.919      | 99      | PICI    | 1377749 | 1389210  | 11.4 |                                                   |
|              |          | sfe:SFxv_1290       | <i>Shigella flexneri</i> | <i>Shigella flexneri</i> 2002017         | 99     | 0.818      | 99      | PICI?   | 1232114 | 1246489  | 14.4 | HNH; terL                                         |
| EC042_1759   | pri      | elo:EC042_1759      | <i>Escherichia coli</i>  | <i>Escherichia coli</i> O44:H18 042      | 466    | 1.000      |         | EcCIO42 |         |          |      |                                                   |
|              |          | ecoh:ECRM13516_1446 | <i>Escherichia coli</i>  | <i>Escherichia coli</i> O145:H28 RM13516 | 466    | 0.998      | 466     | PICI    | 1438775 | 1449995  | 11.2 | Same as <i>Escherichia coli</i> O157:H7 EC4115    |
|              |          | ecoo:ECRM13514_1490 | <i>Escherichia coli</i>  | <i>Escherichia coli</i> O145:H28 RM13514 | 466    | 0.998      | 466     | PICI    | 1462244 | 1473465  | 11.2 | Same as <i>Escherichia coli</i> O157:H7 EC4115    |
|              |          | elr:ECO55CA74_06810 | <i>Escherichia coli</i>  | <i>Escherichia coli</i> O55:H7 RM12579   | 466    | 0.998      | 466     | PICI    | 1438165 | 1449376  | 11.2 | Same as <i>Escherichia coli</i> O157:H7 EC4115    |
|              |          | eoh:ECO103_1242     | <i>Escherichia coli</i>  | <i>Escherichia coli</i> O103:H2 12009    | 466    | 0.998      | 466     | PICI    | 1325875 | 1336965  | 11.1 | Similar to <i>Escherichia coli</i> O157:H7 EC4115 |
|              |          | eok:G2583_1396      | <i>Escherichia coli</i>  | <i>Escherichia coli</i> O55:H7 CB9615    | 466    | 0.998      | 466     | PICI    | 1444572 | 1455794  | 11.2 | Same as <i>Escherichia coli</i> O157:H7 EC4115    |
|              |          | ecf:ECH74115_1577   | <i>Escherichia coli</i>  | <i>Escherichia coli</i> O157:H7 EC4115   | 466    | 0.996      | 466     | PICI    | 1535498 | 15466717 | 11.2 |                                                   |
|              |          | etw:ECSP_1497       | <i>Escherichia coli</i>  | <i>Escherichia coli</i> O157:H7 TW14359  | 466    | 0.996      | 466     | PICI    | 1535786 | 1547005  | 11.2 | Same as <i>Escherichia coli</i> O157:H7 EC4115    |
|              |          | ej:ECO26_1652       | <i>Escherichia coli</i>  | <i>Escherichia coli</i> O26:H11 11368    | 466    | 0.996      | 466     | PICI    | 1619447 | 1630554  | 11.1 | Same as <i>Escherichia coli</i> O157:H7 EC4115    |
|              |          | sbo:SBO_2131        | <i>Shigella boydii</i>   | <i>Shigella boydii</i> Sb227             | 466    | 0.991      | 466     | PICI    | 2097873 | 2108560  | 10.7 |                                                   |
|              |          | eoi:ECO111_2920     | <i>Escherichia coli</i>  | <i>Escherichia coli</i> O111:H- 11128    | 466    | 0.951      | 466     | PICI    | 2855234 | 2864550  | 9.3  |                                                   |

| EcCIO42 gene | Function | Orthologs           | Species                     | Full name                                                    | Length | Similarity | Overlap | Element   | Start   | End      | Size | Comments                                          |
|--------------|----------|---------------------|-----------------------------|--------------------------------------------------------------|--------|------------|---------|-----------|---------|----------|------|---------------------------------------------------|
|              |          | elc:i14_0250        | <i>Escherichia coli</i>     | <i>Escherichia coli</i> clone D i14                          | 471    | 0.875      | 471     | PICI      | 249047  | 259688   | 10.6 |                                                   |
|              |          | eld:i02_0250        | <i>Escherichia coli</i>     | <i>Escherichia coli</i> clone D i2                           | 471    | 0.875      | 471     | PICI      | 249047  | 259688   | 10.6 | Same as <i>Escherichia coli</i> clone D i14       |
|              |          | enc:ECL_01694       | <i>Enterobacter cloacae</i> | <i>Enterobacter cloacae</i> subsp. <i>cloacae</i> ATCC 13047 | 469    | 0.591      | 463     | Prophage? |         |          |      | Chimera prophage & PICI                           |
| EC042_1758   |          | elo:EC042_1758      | <i>Escherichia coli</i>     | <i>Escherichia coli</i> O44:H18 O42                          | 83     | 1.000      |         | EcCIO42   |         |          |      |                                                   |
|              |          | ecf:ECH74115_1578   | <i>Escherichia coli</i>     | <i>Escherichia coli</i> O157:H7 EC4115                       | 83     | 1.000      | 83      | PICI      | 1535498 | 15466717 | 11.2 |                                                   |
|              |          | ecoh:ECRM13516_1447 | <i>Escherichia coli</i>     | <i>Escherichia coli</i> O145:H28 RM13516                     | 83     | 1.000      | 83      | PICI      | 1438775 | 1449995  | 11.2 | Same as <i>Escherichia coli</i> O157:H7 EC4115    |
|              |          | ecoo:ECRM13514_1491 | <i>Escherichia coli</i>     | <i>Escherichia coli</i> O145:H28 RM13514                     | 83     | 1.000      | 83      | PICI      | 1462244 | 1473465  | 11.2 | Same as <i>Escherichia coli</i> O157:H7 EC4115    |
|              |          | elr:ECO55CA74_06815 | <i>Escherichia coli</i>     | <i>Escherichia coli</i> O55:H7 RM12579                       | 83     | 1.000      | 83      | PICI      | 1438165 | 1449376  | 11.2 | Same as <i>Escherichia coli</i> O157:H7 EC4115    |
|              |          | eoh:ECO103_1243     | <i>Escherichia coli</i>     | <i>Escherichia coli</i> O103:H2 12009                        | 83     | 1.000      | 83      | PICI      | 1325875 | 1336965  | 11.1 | Similar to <i>Escherichia coli</i> O157:H7 EC4115 |
|              |          | ej:ECO26_1653       | <i>Escherichia coli</i>     | <i>Escherichia coli</i> O26:H11 11368                        | 83     | 1.000      | 83      | PICI      | 1619447 | 1630554  | 11.1 | Same as <i>Escherichia coli</i> O157:H7 EC4115    |
|              |          | eok:G2583_1397      | <i>Escherichia coli</i>     | <i>Escherichia coli</i> O55:H7 CB9615                        | 83     | 1.000      | 83      | PICI      | 1444572 | 1455794  | 11.2 | Same as <i>Escherichia coli</i> O157:H7 EC4115    |
|              |          | etw:ECSP_1498       | <i>Escherichia coli</i>     | <i>Escherichia coli</i> O157:H7 TW14359                      | 83     | 1.000      | 83      | PICI      | 1535786 | 1547005  | 11.2 | Same as <i>Escherichia coli</i> O157:H7 EC4115    |
|              |          | sbo:SBO_2129        | <i>Shigella boydii</i>      | <i>Shigella boydii</i> Sb227                                 | 93     | 1.000      | 83      | PICI      | 2097873 | 2108560  | 10.7 |                                                   |
|              |          | ece:Z1844           | <i>Escherichia coli</i>     | <i>Escherichia coli</i> O157:H7 EDL933                       | 83     | 0.915      | 82      | PICI?     | 1678546 | 1694015  | 15.5 | HNH; terL                                         |
|              |          | ecs:ECs1586         | <i>Escherichia coli</i>     | <i>Escherichia coli</i> O157:H7 Sakai                        | 83     | 0.915      | 82      | PICI?     | 1594570 | 1610042  | 15.5 | Same as <i>Escherichia coli</i> O157:H7 EDL933    |
|              |          | elx:CDCO157_1519    | <i>Escherichia coli</i>     | <i>Escherichia coli</i> O157:H7 Xuzhou21                     | 83     | 0.915      | 82      | PICI?     | 1596512 | 1611982  | 15.5 | Same as <i>Escherichia coli</i> O157:H7 EDL933    |
|              |          | sfe:SFxv_1293       | <i>Shigella flexneri</i>    | <i>Shigella flexneri</i> 2002017                             | 92     | 0.900      | 80      | PICI?     | 1232114 | 1246489  | 14.4 | HNH; terL                                         |
|              |          | sfl:SF1136          | <i>Shigella flexneri</i>    | <i>Shigella flexneri</i> 301                                 | 92     | 0.900      | 80      | PICI?     | 1174763 | 1189501  | 14.7 | Similar to <i>Shigella flexneri</i> 2002017       |
|              |          | sft:NCTC1_01192     | <i>Shigella flexneri</i>    | <i>Shigella flexneri</i> NCTC1                               | 92     | 0.900      | 80      | PICI?     | 1133207 | 1147945  | 14.7 | Similar to <i>Shigella flexneri</i> 2002017       |
|              |          | eoi:ECO111_2922     | <i>Escherichia coli</i>     | <i>Escherichia coli</i> O111:H- 11128                        | 81     | 0.852      | 81      | PICI      | 2855234 | 2864550  | 9.3  |                                                   |
|              |          | ecq:ECED1_1785      | <i>Escherichia coli</i>     | <i>Escherichia coli</i> O81 ED1a                             | 92     | 0.808      | 78      | PICI?     | 1739927 | 1756201  | 16.3 | HNH; terL                                         |
|              |          | ect:ECIAI39_2019    | <i>Escherichia coli</i>     | <i>Escherichia coli</i> O7:K1 IAI39                          | 85     | 0.759      | 79      | PICI?     | 2060161 | 2074688  | 14.5 | HNH; terL                                         |
| EC042_1757   | ssb      | elo:EC042_1757      | <i>Escherichia coli</i>     | <i>Escherichia coli</i> O44:H18 O42                          | 136    | 1.000      |         | EcCIO42   |         |          |      |                                                   |
|              |          | ecoh:ECRM13516_1448 | <i>Escherichia coli</i>     | <i>Escherichia coli</i> O145:H28 RM13516                     | 136    | 1.000      | 136     | PICI      | 1438775 | 1449995  | 11.2 | Same as <i>Escherichia coli</i> O157:H7 EC4115    |
|              |          | ecoo:ECRM13514_1492 | <i>Escherichia coli</i>     | <i>Escherichia coli</i> O145:H28 RM13514                     | 136    | 1.000      | 136     | PICI      | 1462244 | 1473465  | 11.2 | Same as <i>Escherichia coli</i> O157:H7 EC4115    |
|              |          | elr:ECO55CA74_06820 | <i>Escherichia coli</i>     | <i>Escherichia coli</i> O55:H7 RM12579                       | 136    | 1.000      | 136     | PICI      | 1438165 | 1449376  | 11.2 | Same as <i>Escherichia coli</i> O157:H7 EC4115    |
|              |          | eoh:ECO103_1244     | <i>Escherichia coli</i>     | <i>Escherichia coli</i> O103:H2 12009                        | 136    | 1.000      | 136     | PICI      | 1325875 | 1336965  | 11.1 | Similar to <i>Escherichia coli</i> O157:H7 EC4115 |
|              |          | ej:ECO26_1654       | <i>Escherichia coli</i>     | <i>Escherichia coli</i> O26:H11 11368                        | 136    | 1.000      | 136     | PICI      | 1619447 | 1630554  | 11.1 | Same as <i>Escherichia coli</i> O157:H7 EC4115    |
|              |          | eok:G2583_1398      | <i>Escherichia coli</i>     | <i>Escherichia coli</i> O55:H7 CB9615                        | 136    | 1.000      | 136     | PICI      | 1444572 | 1455794  | 11.2 | Same as <i>Escherichia coli</i> O157:H7 EC4115    |
|              |          | sbo:SBO_2128        | <i>Shigella boydii</i>      | <i>Shigella boydii</i> Sb227                                 | 136    | 1.000      | 136     | PICI      | 2097873 | 2108560  | 10.7 |                                                   |
|              |          | ecf:ECH74115_1579   | <i>Escherichia coli</i>     | <i>Escherichia coli</i> O157:H7 EC4115                       | 136    | 0.993      | 136     | PICI      | 1535498 | 15466717 | 11.2 |                                                   |
|              |          | etw:ECSP_1499       | <i>Escherichia coli</i>     | <i>Escherichia coli</i> O157:H7 TW14359                      | 136    | 0.993      | 136     | PICI      | 1535786 | 1547005  | 11.2 | Same as <i>Escherichia coli</i> O157:H7 EC4115    |

| EcCIO42 gene | Function | Orthologs           | Species                  | Full name                                | Length | Similarity | Overlap | Element | Start   | End     | Size | Comments                                          |
|--------------|----------|---------------------|--------------------------|------------------------------------------|--------|------------|---------|---------|---------|---------|------|---------------------------------------------------|
|              |          | ecc:c1497           | <i>Escherichia coli</i>  | <i>Escherichia coli</i> O6:K2:H1 CFT073  | 136    | 0.978      | 136     | PICI    | 1377749 | 1389210 | 11.4 |                                                   |
|              |          | ecq:ECED1_1784      | <i>Escherichia coli</i>  | <i>Escherichia coli</i> O81 ED1a         | 136    | 0.978      | 136     | PICI?   | 1739927 | 1756201 | 16.3 | HNH; terL                                         |
|              |          | ece:Z1845           | <i>Escherichia coli</i>  | <i>Escherichia coli</i> O157:H7 EDL933   | 136    | 0.978      | 136     | PICI?   | 1678546 | 1694015 | 15.5 | HNH; terL                                         |
|              |          | ecs:ECs1587         | <i>Escherichia coli</i>  | <i>Escherichia coli</i> O157:H7 Sakai    | 136    | 0.978      | 136     | PICI?   | 1594570 | 1610042 | 15.5 | Same as <i>Escherichia coli</i> O157:H7 EDL933    |
|              |          | elx:CDCO157_1520    | <i>Escherichia coli</i>  | <i>Escherichia coli</i> O157:H7 Xuzhou21 | 136    | 0.978      | 136     | PICI?   | 1596512 | 1611982 | 15.5 | Same as <i>Escherichia coli</i> O157:H7 EDL933    |
|              |          | ect:ECIAI39_2018    | <i>Escherichia coli</i>  | <i>Escherichia coli</i> O7:K1 IAI39      | 136    | 0.831      | 136     | PICI?   | 2060161 | 2074688 | 14.5 | HNH; terL                                         |
| EC042_1756   | perC     | elo:EC042_1756      | <i>Escherichia coli</i>  | <i>Escherichia coli</i> O44:H18 042      | 90     | 1.000      |         | EcCIO42 |         |         |      |                                                   |
|              |          | ecoh:ECRM13516_1449 | <i>Escherichia coli</i>  | <i>Escherichia coli</i> O145:H28 RM13516 | 90     | 1.000      | 90      | PICI    | 1438775 | 1449995 | 11.2 | Same as <i>Escherichia coli</i> O157:H7 EC4115    |
|              |          | ecoo:ECRM13514_1493 | <i>Escherichia coli</i>  | <i>Escherichia coli</i> O145:H28 RM13514 | 90     | 1.000      | 90      | PICI    | 1462244 | 1473465 | 11.2 | Same as <i>Escherichia coli</i> O157:H7 EC4115    |
|              |          | elr:ECO55CA74_06825 | <i>Escherichia coli</i>  | <i>Escherichia coli</i> O55:H7 RM12579   | 90     | 1.000      | 90      | PICI    | 1438165 | 1449376 | 11.2 | Same as <i>Escherichia coli</i> O157:H7 EC4115    |
|              |          | eoh:ECO103_1245     | <i>Escherichia coli</i>  | <i>Escherichia coli</i> O103:H2 12009    | 90     | 1.000      | 90      | PICI    | 1325875 | 1336965 | 11.1 | Similar to <i>Escherichia coli</i> O157:H7 EC4115 |
|              |          | ej:ECO26_1655       | <i>Escherichia coli</i>  | <i>Escherichia coli</i> O26:H11 11368    | 90     | 1.000      | 90      | PICI    | 1619447 | 1630554 | 11.1 | Same as <i>Escherichia coli</i> O157:H7 EC4115    |
|              |          | etw:ECSP_1500       | <i>Escherichia coli</i>  | <i>Escherichia coli</i> O157:H7 TW14359  | 90     | 1.000      | 90      | PICI    | 1535786 | 1547005 | 11.2 | Same as <i>Escherichia coli</i> O157:H7 EC4115    |
|              |          | ecs:ECs1588         | <i>Escherichia coli</i>  | <i>Escherichia coli</i> O157:H7 Sakai    | 90     | 0.900      | 90      | PICI?   | 1594570 | 1610042 | 15.5 | Same as <i>Escherichia coli</i> O157:H7 EDL933    |
|              |          | elx:CDCO157_1521    | <i>Escherichia coli</i>  | <i>Escherichia coli</i> O157:H7 Xuzhou21 | 90     | 0.900      | 90      | PICI?   | 1596512 | 1611982 | 15.5 | Same as <i>Escherichia coli</i> O157:H7 EDL933    |
|              |          | ecq:ECED1_1783      | <i>Escherichia coli</i>  | <i>Escherichia coli</i> O81 ED1a         | 122    | 0.844      | 77      | PICI?   | 1739927 | 1756201 | 16.3 | HNH; terL                                         |
|              |          | eck:EC55989_0279    | <i>Escherichia coli</i>  | <i>Escherichia coli</i> 55989            | 95     | 0.489      | 88      | PICI    | 296286  | 311648  | 15.3 |                                                   |
| EC042_1755   |          | elo:EC042_1755      | <i>Escherichia coli</i>  | <i>Escherichia coli</i> O44:H18 042      | 74     | 1.000      |         | EcCIO42 |         |         |      |                                                   |
|              |          | ecoh:ECRM13516_1451 | <i>Escherichia coli</i>  | <i>Escherichia coli</i> O145:H28 RM13516 | 74     | 1.000      | 74      | PICI    | 1438775 | 1449995 | 11.2 | Same as <i>Escherichia coli</i> O157:H7 EC4115    |
|              |          | ecoo:ECRM13514_1495 | <i>Escherichia coli</i>  | <i>Escherichia coli</i> O145:H28 RM13514 | 74     | 1.000      | 74      | PICI    | 1462244 | 1473465 | 11.2 | Same as <i>Escherichia coli</i> O157:H7 EC4115    |
|              |          | elr:ECO55CA74_06830 | <i>Escherichia coli</i>  | <i>Escherichia coli</i> O55:H7 RM12579   | 74     | 1.000      | 74      | PICI    | 1438165 | 1449376 | 11.2 | Same as <i>Escherichia coli</i> O157:H7 EC4115    |
|              |          | eoh:ECO103_1246     | <i>Escherichia coli</i>  | <i>Escherichia coli</i> O103:H2 12009    | 74     | 1.000      | 74      | PICI    | 1325875 | 1336965 | 11.1 | Similar to <i>Escherichia coli</i> O157:H7 EC4115 |
|              |          | ej:ECO26_1656       | <i>Escherichia coli</i>  | <i>Escherichia coli</i> O26:H11 11368    | 74     | 1.000      | 74      | PICI    | 1619447 | 1630554 | 11.1 | Same as <i>Escherichia coli</i> O157:H7 EC4115    |
|              |          | etw:ECSP_1501       | <i>Escherichia coli</i>  | <i>Escherichia coli</i> O157:H7 TW14359  | 74     | 1.000      | 74      | PICI    | 1535786 | 1547005 | 11.2 | Same as <i>Escherichia coli</i> O157:H7 EC4115    |
|              |          | sbo:SBO_2127        | <i>Shigella boydii</i>   | <i>Shigella boydii</i> Sb227             | 74     | 1.000      | 74      | PICI    | 2097873 | 2108560 | 10.7 |                                                   |
|              |          | ece:Z1846           | <i>Escherichia coli</i>  | <i>Escherichia coli</i> O157:H7 EDL933   | 100    | 0.986      | 74      | PICI?   | 1678546 | 1694015 | 15.5 | HNH; terL                                         |
|              |          | ecs:ECs1589         | <i>Escherichia coli</i>  | <i>Escherichia coli</i> O157:H7 Sakai    | 100    | 0.986      | 74      | PICI?   | 1594570 | 1610042 | 15.5 | Same as <i>Escherichia coli</i> O157:H7 EDL933    |
|              |          | elx:CDCO157_1522    | <i>Escherichia coli</i>  | <i>Escherichia coli</i> O157:H7 Xuzhou21 | 100    | 0.986      | 74      | PICI?   | 1596512 | 1611982 | 15.5 | Same as <i>Escherichia coli</i> O157:H7 EDL933    |
|              |          | ecq:ECED1_1781      | <i>Escherichia coli</i>  | <i>Escherichia coli</i> O81 ED1a         | 100    | 0.932      | 74      | PICI?   | 1739927 | 1756201 | 16.3 | HNH; terL                                         |
|              |          | sft:SF1137          | <i>Shigella flexneri</i> | <i>Shigella flexneri</i> 301             | 100    | 0.932      | 74      | PICI?   | 1174763 | 1189501 | 14.7 | Similar to <i>Shigella flexneri</i> 2002017       |
|              |          | sft:NCTC1_01195     | <i>Shigella flexneri</i> | <i>Shigella flexneri</i> NCTC1           | 74     | 0.932      | 74      | PICI?   | 1133207 | 1147945 | 14.7 | Similar to <i>Shigella flexneri</i> 2002017       |
|              |          | sfv:SFV_1153        | <i>Shigella flexneri</i> | <i>Shigella flexneri</i> 8401            | 100    | 0.932      | 74      | PICI?   | 1192843 | 1208358 | 15.5 | Similar to <i>Shigella flexneri</i> 2002017       |

| EcCIO42 gene | Function | Orthologs           | Species                  | Full name                                | Length | Similarity | Overlap | Element   | Start   | End      | Size | Comments                                          |
|--------------|----------|---------------------|--------------------------|------------------------------------------|--------|------------|---------|-----------|---------|----------|------|---------------------------------------------------|
|              |          | sfx:S1219           | <i>Shigella flexneri</i> | <i>Shigella flexneri</i> 2457T           | 74     | 0.932      | 74      | PICI?     | 1177656 | 1192394  | 14.7 | Similar to <i>Shigella flexneri</i> 2002017       |
|              |          | ecm:EcSMS35_0949    | <i>Escherichia coli</i>  | <i>Escherichia coli</i> SMS-3-5          | 80     | 0.444      | 72      | PICI?     | 955625  | 970780   | 15.2 | HNH; terL                                         |
| EC042_1754   |          | elo:EC042_1754      | <i>Escherichia coli</i>  | <i>Escherichia coli</i> O44:H18 042      | 79     | 1.000      |         | EcCIO42   |         |          |      |                                                   |
|              |          | sbo:SBO_2126        | <i>Shigella boydii</i>   | <i>Shigella boydii</i> Sb227             | 79     | 1.000      | 79      | PICI      | 2097873 | 2108560  | 10.7 |                                                   |
|              |          | ecoi:ECOPMV1_00893  | <i>Escherichia coli</i>  | <i>Escherichia coli</i> PMV-1            | 68     | 1.000      | 68      | PICI      | 919885  | 930438   | 10.5 |                                                   |
|              |          | eih:ECOK1_0892      | <i>Escherichia coli</i>  | <i>Escherichia coli</i> IHE3034          | 68     | 1.000      | 68      | PICI      | 920272  | 930825   | 10.5 | Same as <i>Escherichia coli</i> PMV-1             |
|              |          | elr:ECO55CA74_06835 | <i>Escherichia coli</i>  | <i>Escherichia coli</i> O55:H7 RM12579   | 68     | 1.000      | 68      | PICI      | 1438165 | 1449376  | 11.2 | Same as <i>Escherichia coli</i> O157:H7 EC4115    |
|              |          | elu:UM146_13195     | <i>Escherichia coli</i>  | <i>Escherichia coli</i> UM146            | 68     | 1.000      | 68      | PICI      | 2721434 | 2731984  | 10.5 | Same as <i>Escherichia coli</i> PMV-1             |
|              |          | eok:G2583_1399      | <i>Escherichia coli</i>  | <i>Escherichia coli</i> O55:H7 CB9615    | 68     | 1.000      | 68      | PICI      | 1444572 | 1455794  | 11.2 | Same as <i>Escherichia coli</i> O157:H7 EC4115    |
|              |          | ecf:ECH74115_1582   | <i>Escherichia coli</i>  | <i>Escherichia coli</i> O157:H7 EC4115   | 68     | 0.985      | 68      | PICI      | 1535498 | 15466717 | 11.2 |                                                   |
|              |          | etw:ECSP_1502       | <i>Escherichia coli</i>  | <i>Escherichia coli</i> O157:H7 TW14359  | 68     | 0.985      | 68      | PICI      | 1535786 | 1547005  | 11.2 | Same as <i>Escherichia coli</i> O157:H7 EC4115    |
|              |          | eoh:ECO103_1247     | <i>Escherichia coli</i>  | <i>Escherichia coli</i> O103:H2 12009    | 68     | 0.691      | 68      | PICI      | 1325875 | 1336965  | 11.1 | Similar to <i>Escherichia coli</i> O157:H7 EC4115 |
|              |          | ecoh:ECRM13516_1452 | <i>Escherichia coli</i>  | <i>Escherichia coli</i> O145:H28 RM13516 | 68     | 0.691      | 68      | PICI      | 1438775 | 1449995  | 11.2 | Same as <i>Escherichia coli</i> O157:H7 EC4115    |
| EC042_1753   | capsid   | elo:EC042_1753      | <i>Escherichia coli</i>  | <i>Escherichia coli</i> O44:H18 042      | 351    | 1.000      |         | EcCIO42   |         |          |      |                                                   |
|              |          | ecf:ECH74115_1583   | <i>Escherichia coli</i>  | <i>Escherichia coli</i> O157:H7 EC4115   | 351    | 1.000      | 351     | PICI      | 1535498 | 15466717 | 11.2 |                                                   |
|              |          | elr:ECO55CA74_06840 | <i>Escherichia coli</i>  | <i>Escherichia coli</i> O55:H7 RM12579   | 351    | 1.000      | 351     | PICI      | 1438165 | 1449376  | 11.2 | Same as <i>Escherichia coli</i> O157:H7 EC4115    |
|              |          | eok:G2583_1400      | <i>Escherichia coli</i>  | <i>Escherichia coli</i> O55:H7 CB9615    | 351    | 1.000      | 351     | PICI      | 1444572 | 1455794  | 11.2 | Same as <i>Escherichia coli</i> O157:H7 EC4115    |
|              |          | etw:ECSP_1503       | <i>Escherichia coli</i>  | <i>Escherichia coli</i> O157:H7 TW14359  | 351    | 1.000      | 351     | PICI      | 1535786 | 1547005  | 11.2 | Same as <i>Escherichia coli</i> O157:H7 EC4115    |
|              |          | sbo:SBO_2125        | <i>Shigella boydii</i>   | <i>Shigella boydii</i> Sb227             | 351    | 0.972      | 351     | PICI      | 2097873 | 2108560  | 10.7 |                                                   |
|              |          | ecoh:ECRM13516_1453 | <i>Escherichia coli</i>  | <i>Escherichia coli</i> O145:H28 RM13516 | 351    | 0.960      | 351     | PICI      | 1438775 | 1449995  | 11.2 | Same as <i>Escherichia coli</i> O157:H7 EC4115    |
|              |          | eoh:ECO103_1248     | <i>Escherichia coli</i>  | <i>Escherichia coli</i> O103:H2 12009    | 351    | 0.960      | 351     | PICI      | 1325875 | 1336965  | 11.1 | Similar to <i>Escherichia coli</i> O157:H7 EC4115 |
|              |          | eoj:ECO26_1658      | <i>Escherichia coli</i>  | <i>Escherichia coli</i> O26:H11 11368    | 351    | 0.960      | 351     | PICI      | 1619447 | 1630554  | 11.1 | Same as <i>Escherichia coli</i> O157:H7 EC4115    |
|              |          | ecoo:ECRM13514_1497 | <i>Escherichia coli</i>  | <i>Escherichia coli</i> O145:H28 RM13514 | 351    | 0.957      | 351     | PICI      | 1462244 | 1473465  | 11.2 | Same as <i>Escherichia coli</i> O157:H7 EC4115    |
|              |          | ecc:c1499           | <i>Escherichia coli</i>  | <i>Escherichia coli</i> O6:K2:H1 CFT073  | 351    | 0.969      | 350     | PICI      | 1377749 | 1389210  | 11.4 |                                                   |
|              |          | ecoi:ECOPMV1_00894  | <i>Escherichia coli</i>  | <i>Escherichia coli</i> PMV-1            | 351    | 0.954      | 350     | PICI      | 919885  | 930438   | 10.5 |                                                   |
|              |          | eih:ECOK1_0893      | <i>Escherichia coli</i>  | <i>Escherichia coli</i> IHE3034          | 351    | 0.954      | 350     | PICI      | 920272  | 930825   | 10.5 | Same as <i>Escherichia coli</i> PMV-1             |
|              |          | elu:UM146_13190     | <i>Escherichia coli</i>  | <i>Escherichia coli</i> UM146            | 351    | 0.954      | 350     | PICI      | 2721434 | 2731984  | 10.5 | Same as <i>Escherichia coli</i> PMV-1             |
|              |          | ecq:ECED1_2651      | <i>Escherichia coli</i>  | <i>Escherichia coli</i> O81 ED1a         | 351    | 0.937      | 351     | PICI      | 2568989 | 2580418  | 11.4 |                                                   |
|              |          | elc:i14_0254        | <i>Escherichia coli</i>  | <i>Escherichia coli</i> clone D i14      | 351    | 0.934      | 350     | PICI      | 249047  | 259688   | 10.6 |                                                   |
|              |          | eid:i02_0254        | <i>Escherichia coli</i>  | <i>Escherichia coli</i> clone D i2       | 351    | 0.934      | 350     | PICI      | 249047  | 259688   | 10.6 | Same as <i>Escherichia coli</i> clone D i14       |
|              |          | eln:NRG857_05760    | <i>Escherichia coli</i>  | <i>Escherichia coli</i> O83:H1 NRG 857C  | 346    | 0.547      | 340     | Prophage? |         |          |      | Chimera prophage & PICI                           |



| EcCIO42 gene     | Function                | Orthologs                           | Species                 | Full name                                | Length | Similarity | Overlap | Element | Start   | End      | Size                    | Comments                                          |
|------------------|-------------------------|-------------------------------------|-------------------------|------------------------------------------|--------|------------|---------|---------|---------|----------|-------------------------|---------------------------------------------------|
| EC042_1752       | HDHD                    | elo:EC042_1752                      | <i>Escherichia coli</i> | <i>Escherichia coli</i> O44:H18 O42      | 111    | 1.000      |         | EcCIO42 |         |          |                         |                                                   |
|                  |                         | ecf:ECH74115_1584                   | <i>Escherichia coli</i> | <i>Escherichia coli</i> O157:H7 EC4115   | 111    | 1.000      | 111     | PICI    | 1535498 | 15466717 | 11.2                    |                                                   |
|                  |                         | elr:ECO55CA74_06_845                | <i>Escherichia coli</i> | <i>Escherichia coli</i> O55:H7 RM12579   | 111    | 1.000      | 111     | PICI    | 1438165 | 1449376  | 11.2                    | Same as <i>Escherichia coli</i> O157:H7 EC4115    |
|                  |                         | eok:G2583_1401                      | <i>Escherichia coli</i> | <i>Escherichia coli</i> O55:H7 CB9615    | 111    | 1.000      | 111     | PICI    | 1444572 | 1455794  | 11.2                    | Same as <i>Escherichia coli</i> O157:H7 EC4115    |
|                  |                         | etw:ECSP_1504                       | <i>Escherichia coli</i> | <i>Escherichia coli</i> O157:H7 TW14359  | 111    | 1.000      | 111     | PICI    | 1535786 | 1547005  | 11.2                    | Same as <i>Escherichia coli</i> O157:H7 EC4115    |
|                  |                         | ecoi:ECOPMV1_008_95                 | <i>Escherichia coli</i> | <i>Escherichia coli</i> PMV-1            | 111    | 0.991      | 111     | PICI    | 919885  | 930438   | 10.5                    |                                                   |
|                  |                         | eih:ECOK1_0894                      | <i>Escherichia coli</i> | <i>Escherichia coli</i> IHE3034          | 111    | 0.991      | 111     | PICI    | 920272  | 930825   | 10.5                    | Same as <i>Escherichia coli</i> PMV-1             |
|                  |                         | elU:UM146_13185                     | <i>Escherichia coli</i> | <i>Escherichia coli</i> UM146            | 111    | 0.991      | 111     | PICI    | 2721434 | 2731984  | 10.5                    | Same as <i>Escherichia coli</i> PMV-1             |
|                  |                         | ecq:ECED1_2652                      | <i>Escherichia coli</i> | <i>Escherichia coli</i> O81 ED1a         | 111    | 0.991      | 111     | PICI    | 2568989 | 2580418  | 11.4                    |                                                   |
|                  |                         | elc:i14_0255                        | <i>Escherichia coli</i> | <i>Escherichia coli</i> clone D i14      | 111    | 0.991      | 111     | PICI    | 249047  | 259688   | 10.6                    |                                                   |
|                  |                         | eld:i02_0255                        | <i>Escherichia coli</i> | <i>Escherichia coli</i> clone D i2       | 111    | 0.991      | 111     | PICI    | 249047  | 259688   | 10.6                    | Same as <i>Escherichia coli</i> clone D i14       |
|                  |                         | ecc:c1500                           | <i>Escherichia coli</i> | <i>Escherichia coli</i> O6:K2:H1 CFT073  | 111    | 0.982      | 111     | PICI    | 1377749 | 1389210  | 11.4                    |                                                   |
|                  |                         | ecoh:ECRM13516_1_454                | <i>Escherichia coli</i> | <i>Escherichia coli</i> O145:H28 RM13516 | 111    | 0.973      | 111     | PICI    | 1438775 | 1449995  | 11.2                    | Same as <i>Escherichia coli</i> O157:H7 EC4115    |
|                  |                         | ecoo:ECRM13514_1_498                | <i>Escherichia coli</i> | <i>Escherichia coli</i> O145:H28 RM13514 | 111    | 0.973      | 111     | PICI    | 1462244 | 1473465  | 11.2                    | Same as <i>Escherichia coli</i> O157:H7 EC4115    |
|                  |                         | eoh:ECO103_1249                     | <i>Escherichia coli</i> | <i>Escherichia coli</i> O103:H2 12009    | 111    | 0.973      | 111     | PICI    | 1325875 | 1336965  | 11.1                    | Similar to <i>Escherichia coli</i> O157:H7 EC4115 |
|                  |                         | eoj:ECO26_1659                      | <i>Escherichia coli</i> | <i>Escherichia coli</i> O26:H11 11368    | 111    | 0.973      | 111     | PICI    | 1619447 | 1630554  | 11.1                    | Same as <i>Escherichia coli</i> O157:H7 EC4115    |
| sbo:SBO_2124     | <i>Shigella boydii</i>  | <i>Shigella boydii</i> Sb227        | 111                     | 0.982                                    | 111    | PICI       | 2097873 | 2108560 | 10.7    |          |                         |                                                   |
| ect:ECIAI39_0514 | <i>Escherichia coli</i> | <i>Escherichia coli</i> O7:K1 IAI39 | 113                     | 0.545                                    | 112    | Prophage?  |         |         |         |          | Chimera prophage & PICI |                                                   |
| EC042_1751       |                         | elo:EC042_1751                      | <i>Escherichia coli</i> | <i>Escherichia coli</i> O44:H18 O42      | 130    | 1.000      |         | EcCIO42 |         |          |                         |                                                   |
|                  |                         | eok:G2583_1402                      | <i>Escherichia coli</i> | <i>Escherichia coli</i> O55:H7 CB9615    | 137    | 0.985      | 130     | PICI    | 1444572 | 1455794  | 11.2                    | Same as <i>Escherichia coli</i> O157:H7 EC4115    |
|                  |                         | elr:ECO55CA74_06_850                | <i>Escherichia coli</i> | <i>Escherichia coli</i> O55:H7 RM12579   | 137    | 0.977      | 130     | PICI    | 1438165 | 1449376  | 11.2                    | Same as <i>Escherichia coli</i> O157:H7 EC4115    |
|                  |                         | ecf:ECH74115_1585                   | <i>Escherichia coli</i> | <i>Escherichia coli</i> O157:H7 EC4115   | 137    | 0.977      | 130     | PICI    | 1535498 | 15466717 | 11.2                    |                                                   |
|                  |                         | etw:ECSP_1505                       | <i>Escherichia coli</i> | <i>Escherichia coli</i> O157:H7 TW14359  | 137    | 0.977      | 130     | PICI    | 1535786 | 1547005  | 11.2                    | Same as <i>Escherichia coli</i> O157:H7 EC4115    |
|                  |                         | ecc:c1501                           | <i>Escherichia coli</i> | <i>Escherichia coli</i> O6:K2:H1 CFT073  | 137    | 0.954      | 130     | PICI    | 1377749 | 1389210  | 11.4                    |                                                   |
|                  |                         | ecoi:ECOPMV1_008_96                 | <i>Escherichia coli</i> | <i>Escherichia coli</i> PMV-1            | 137    | 0.946      | 130     | PICI    | 919885  | 930438   | 10.5                    |                                                   |
|                  |                         | eih:ECOK1_0895                      | <i>Escherichia coli</i> | <i>Escherichia coli</i> IHE3034          | 137    | 0.946      | 130     | PICI    | 920272  | 930825   | 10.5                    | Same as <i>Escherichia coli</i> PMV-1             |
|                  |                         | elU:UM146_13180                     | <i>Escherichia coli</i> | <i>Escherichia coli</i> UM146            | 137    | 0.946      | 130     | PICI    | 2721434 | 2731984  | 10.5                    | Same as <i>Escherichia coli</i> PMV-1             |
|                  |                         | sbo:SBO_2123                        | <i>Shigella boydii</i>  | <i>Shigella boydii</i> Sb227             | 137    | 0.931      | 130     | PICI    | 2097873 | 2108560  | 10.7                    |                                                   |
|                  |                         | ecq:ECED1_2653                      | <i>Escherichia coli</i> | <i>Escherichia coli</i> O81 ED1a         | 137    | 0.915      | 130     | PICI    | 2568989 | 2580418  | 11.4                    |                                                   |
|                  |                         | ecoh:ECRM13516_1_455                | <i>Escherichia coli</i> | <i>Escherichia coli</i> O145:H28 RM13516 | 137    | 0.915      | 130     | PICI    | 1438775 | 1449995  | 11.2                    | Same as <i>Escherichia coli</i> O157:H7 EC4115    |
|                  |                         | ecoo:ECRM13514_1_499                | <i>Escherichia coli</i> | <i>Escherichia coli</i> O145:H28 RM13514 | 137    | 0.915      | 130     | PICI    | 1462244 | 1473465  | 11.2                    | Same as <i>Escherichia coli</i> O157:H7 EC4115    |
|                  |                         | eoh:ECO103_1250                     | <i>Escherichia coli</i> | <i>Escherichia coli</i> O103:H2 12009    | 137    | 0.915      | 130     | PICI    | 1325875 | 1336965  | 11.1                    | Similar to <i>Escherichia coli</i> O157:H7 EC4115 |
|                  |                         | eoj:ECO26_1660                      | <i>Escherichia coli</i> | <i>Escherichia coli</i> O26:H11 11368    | 137    | 0.915      | 130     | PICI    | 1619447 | 1630554  | 11.1                    | Same as <i>Escherichia coli</i> O157:H7 EC4115    |

| EcCIO42 gene | Function | Orthologs              | Species                          | Full name                                    | Length | Similarity | Overlap | Element   | Start   | End      | Size | Comments                                            |
|--------------|----------|------------------------|----------------------------------|----------------------------------------------|--------|------------|---------|-----------|---------|----------|------|-----------------------------------------------------|
|              |          | elc:i14_0256           | <i>Escherichia coli</i>          | <i>Escherichia coli</i> clone D i14          | 137    | 0.885      | 130     | PICI      | 249047  | 259688   | 10.6 |                                                     |
|              |          | eld:i02_0256           | <i>Escherichia coli</i>          | <i>Escherichia coli</i> clone D i2           | 137    | 0.885      | 130     | PICI      | 249047  | 259688   | 10.6 | Same as <i>Escherichia coli</i> clone D i14         |
|              |          | eoc:CE10_1475          | <i>Escherichia coli</i>          | <i>Escherichia coli</i> O7:K1 CE10           | 501    | 0.386      | 83      | Phage     |         |          |      |                                                     |
| EC042_1750   |          | elo:EC042_1750         | <i>Escherichia coli</i>          | <i>Escherichia coli</i> O44:H18 O42          | 113    | 1.000      |         | EcCIO42   |         |          |      |                                                     |
|              |          | ecc:c1503              | <i>Escherichia coli</i>          | <i>Escherichia coli</i> O6:K2:H1 CFT073      | 113    | 0.982      | 113     | PICI      | 1377749 | 1389210  | 11.4 |                                                     |
|              |          | sbo:SBO_2121           | <i>Shigella boydii</i>           | <i>Shigella boydii</i> Sb227                 | 113    | 0.982      | 113     | PICI      | 2097873 | 2108560  | 10.7 |                                                     |
|              |          | aaw:AVL56_03045        | <i>Alteromonas addita</i>        | <i>Alteromonas addita</i> R10SW13            | 774    | 0.340      | 106     | No insert |         |          |      |                                                     |
|              |          | asp:AOR13_2906         | <i>Alteromonas stellipolaris</i> | <i>Alteromonas stellipolaris</i> LMG 21856   | 774    | 0.340      | 106     | No insert |         |          |      |                                                     |
|              |          | asq:AVL57_04270        | <i>Alteromonas stellipolaris</i> | <i>Alteromonas stellipolaris</i> LMG 21861   | 774    | 0.340      | 106     | No insert |         |          |      |                                                     |
|              |          | pte:PTT_18114          | <i>Pyrenophora teres</i>         | <i>Pyrenophora teres</i> f. <i>teres</i> 0-1 | 380    | 0.318      | 88      |           |         |          |      | RefSeq (Assembly: <a href="#">GCF_000166005.1</a> ) |
|              |          | tru:101068395          | <i>Takifugu rubripes</i>         | <i>Takifugu rubripes</i>                     | 1244   | 0.312      | 96      |           |         |          |      | RefSeq (Assembly: <a href="#">GCF_000180615.1</a> ) |
|              |          | miu:ABE85_20515        | <i>Mitsuaria</i> sp. 7           | <i>Mitsuaria</i> sp. 7                       | 285    | 0.322      | 87      | No insert |         |          |      |                                                     |
|              |          | spaa:SPAPADRAFT_153792 | <i>Spathaspora passalidarum</i>  | <i>Spathaspora passalidarum</i> NRRL Y-27907 | 711    | 0.309      | 81      |           |         |          |      | RefSeq (Assembly: <a href="#">GCF_000223485.1</a> ) |
|              |          | ang:ANI_1_2260104      | <i>Aspergillus niger</i>         | <i>Aspergillus niger</i> CBS 513.88          | 412    | 0.354      | 113     |           |         |          |      | RefSeq (Assembly: <a href="#">GCF_000002855.3</a> ) |
| EC042_1749   |          | elo:EC042_1749         | <i>Escherichia coli</i>          | <i>Escherichia coli</i> O44:H18 O42          | 93     | 1.000      |         | EcCIO42   |         |          |      |                                                     |
|              |          | eih:ECOK1_0897         | <i>Escherichia coli</i>          | <i>Escherichia coli</i> IHE3034              | 93     | 0.957      | 93      | PICI      | 920272  | 930825   | 10.5 | Same as <i>Escherichia coli</i> PMV-1               |
|              |          | sbo:SBO_2120           | <i>Shigella boydii</i>           | <i>Shigella boydii</i> Sb227                 | 93     | 0.957      | 93      | PICI      | 2097873 | 2108560  | 10.7 |                                                     |
|              |          | ecf:ECH74115_1588      | <i>Escherichia coli</i>          | <i>Escherichia coli</i> O157:H7 EC4115       | 93     | 0.925      | 93      | PICI      | 1535498 | 15466717 | 11.2 |                                                     |
|              |          | ecoh:ECRM13516_1457    | <i>Escherichia coli</i>          | <i>Escherichia coli</i> O145:H28 RM13516     | 93     | 0.925      | 93      | PICI      | 1438775 | 1449995  | 11.2 | Same as <i>Escherichia coli</i> O157:H7 EC4115      |
|              |          | ecoo:ECRM13514_1501    | <i>Escherichia coli</i>          | <i>Escherichia coli</i> O145:H28 RM13514     | 93     | 0.925      | 93      | PICI      | 1462244 | 1473465  | 11.2 | Same as <i>Escherichia coli</i> O157:H7 EC4115      |
|              |          | elr:ECO55CA74_06860    | <i>Escherichia coli</i>          | <i>Escherichia coli</i> O55:H7 RM12579       | 93     | 0.925      | 93      | PICI      | 1438165 | 1449376  | 11.2 | Same as <i>Escherichia coli</i> O157:H7 EC4115      |
|              |          | eoh:ECO103_1252        | <i>Escherichia coli</i>          | <i>Escherichia coli</i> O103:H2 12009        | 93     | 0.925      | 93      | PICI      | 1325875 | 1336965  | 11.1 | Similar to <i>Escherichia coli</i> O157:H7 EC4115   |
|              |          | ej:ECO26_1662          | <i>Escherichia coli</i>          | <i>Escherichia coli</i> O26:H11 11368        | 93     | 0.925      | 93      | PICI      | 1619447 | 1630554  | 11.1 | Same as <i>Escherichia coli</i> O157:H7 EC4115      |
|              |          | eok:G2583_1404         | <i>Escherichia coli</i>          | <i>Escherichia coli</i> O55:H7 CB9615        | 93     | 0.925      | 93      | PICI      | 1444572 | 1455794  | 11.2 | Same as <i>Escherichia coli</i> O157:H7 EC4115      |
|              |          | etw:ECSP_1507          | <i>Escherichia coli</i>          | <i>Escherichia coli</i> O157:H7 TW14359      | 93     | 0.925      | 93      | PICI      | 1535786 | 1547005  | 11.2 | Same as <i>Escherichia coli</i> O157:H7 EC4115      |
|              |          | ece:Z1855              | <i>Escherichia coli</i>          | <i>Escherichia coli</i> O157:H7 EDL933       | 93     | 0.925      | 93      | PICI?     | 1678546 | 1694015  | 15.5 | HNH; terL                                           |
|              |          | ecs:ECs1599            | <i>Escherichia coli</i>          | <i>Escherichia coli</i> O157:H7 Sakai        | 93     | 0.925      | 93      | PICI?     | 1594570 | 1610042  | 15.5 | Same as <i>Escherichia coli</i> O157:H7 EDL933      |
|              |          | elx:CDCO157_1532       | <i>Escherichia coli</i>          | <i>Escherichia coli</i> O157:H7 Xuzhou21     | 93     | 0.925      | 93      | PICI?     | 1596512 | 1611982  | 15.5 | Same as <i>Escherichia coli</i> O157:H7 EDL933      |
|              |          | ecc:c1505              | <i>Escherichia coli</i>          | <i>Escherichia coli</i> O6:K2:H1 CFT073      | 93     | 0.914      | 93      | PICI      | 1377749 | 1389210  | 11.4 |                                                     |
|              |          | sfe:SFxv_1307          | <i>Shigella flexneri</i>         | <i>Shigella flexneri</i> 2002017             | 93     | 0.903      | 93      | PICI?     | 1232114 | 1246489  | 14.4 | HNH; terL                                           |

**Table S4. PmCIATCC43137 orthologies.**

| PmCIATCC 43137  | Function                        | Orthologs                                     | Species                                         | Full name                                                 | Length | Similarity      | Overlap | Element         | Start   | End                                        | Size | Comments                                            |
|-----------------|---------------------------------|-----------------------------------------------|-------------------------------------------------|-----------------------------------------------------------|--------|-----------------|---------|-----------------|---------|--------------------------------------------|------|-----------------------------------------------------|
| DR93_170        | int                             | pmul:DR93_170                                 | <i>Pasteurella multocida</i>                    | <i>Pasteurella multocida</i> ATCC 43137                   | 427    | 1.000           |         | PmCIATC C 43137 |         |                                            |      |                                                     |
|                 |                                 | pmp:Pmu_15680                                 | <i>Pasteurella multocida</i>                    | <i>Pasteurella multocida</i> 36950                        | 427    | 0.998           | 427     | PmCIATC C 43137 | 1677145 | 1691873                                    | 14.7 |                                                     |
|                 |                                 | pul:NT08PM_1626                               | <i>Pasteurella multocida</i>                    | <i>Pasteurella multocida</i> subsp. <i>multocida</i> 3480 | 427    | 0.965           | 427     | PICI            | 1690704 | 1703854                                    | 13.1 |                                                     |
|                 |                                 | pmu:PM1769                                    | <i>Pasteurella multocida</i>                    | <i>Pasteurella multocida</i> subsp. <i>multocida</i> Pm70 | 417    | 0.962           | 417     | PICI            | 1994540 | 2009007                                    | 14.5 | Similar to PmClPm3480                               |
|                 |                                 | hap:HAPS_1587                                 | <i>Haemophilus parasuis</i>                     | <i>Haemophilus parasuis</i> SH0165                        | 416    | 0.644           | 417     | PICI?           | 1557480 | 1565531                                    | 8    | Not commun structure                                |
|                 |                                 | aah:CF65_01449                                | <i>Aggregatibacter actinomycetemcomitans</i>    | <i>Aggregatibacter actinomycetemcomitans</i> HK1651       | 307    | 0.639           | 277     | No insert       |         |                                            |      |                                                     |
|                 |                                 | mhae:F382_05840                               | <i>Mannheimia haemolytica</i>                   | <i>Mannheimia haemolytica</i> D153                        | 408    | 0.447           | 425     | Defective PICI? |         |                                            |      |                                                     |
|                 |                                 | mhal:N220_11990                               | <i>Mannheimia haemolytica</i>                   | <i>Mannheimia haemolytica</i> USMARC_2286                 | 408    | 0.447           | 425     | Defective PICI? |         |                                            |      | Same as <i>Mannheimia haemolytica</i> D153          |
|                 |                                 | mhao:J451_06080                               | <i>Mannheimia haemolytica</i>                   | <i>Mannheimia haemolytica</i> D174                        | 408    | 0.447           | 425     | Defective PICI? |         |                                            |      | Same as <i>Mannheimia haemolytica</i> D153          |
|                 |                                 | mhaq:WC39_02240                               | <i>Mannheimia haemolytica</i>                   | <i>Mannheimia haemolytica</i> 89010807N                   | 408    | 0.447           | 425     | Defective PICI? |         |                                            |      | Same as <i>Mannheimia haemolytica</i> D153          |
| mhay:VK67_02245 | <i>Mannheimia haemolytica</i>   | <i>Mannheimia haemolytica</i> 89010807N lktA- | 408                                             | 0.447                                                     | 425    | Defective PICI? |         |                 |         | Same as <i>Mannheimia haemolytica</i> D153 |      |                                                     |
| DR93_169        |                                 | pmul:DR93_169                                 | <i>Pasteurella multocida</i>                    | <i>Pasteurella multocida</i> ATCC 43137                   | 201    | 1.000           |         | PmCIATC C 43137 |         |                                            |      |                                                     |
|                 |                                 | pmp:Pmu_15680                                 | <i>Pasteurella multocida</i>                    | <i>Pasteurella multocida</i> 36950                        | 201    | 1.000           | 201     | PmCIATC C 43137 | 1677145 | 1691873                                    | 14.7 |                                                     |
|                 |                                 | aap:NT05HA_1837                               | <i>Aggregatibacter aphrophilus</i>              | <i>Aggregatibacter aphrophilus</i> NJ8700                 | 167    | 0.310           | 142     | PICI            | 1811901 | 1821358                                    | 9.4  |                                                     |
|                 |                                 | bip:BinT_1433                                 | <i>Brachyspira intermedia</i>                   | <i>Brachyspira intermedia</i>                             | 7866   | 0.266           | 154     | No insert       |         |                                            |      | Plasmid                                             |
|                 |                                 | arc:ABLL_0889                                 | <i>Arcobacter</i> sp. L                         | <i>Arcobacter</i> sp. L                                   | 744    | 0.308           | 107     | No insert       |         |                                            |      | Plasmid                                             |
|                 |                                 | stur:STURON_00280                             | <i>Spiroplasma turonicum</i>                    | <i>Spiroplasma turonicum</i> Tab4c                        | 638    | 0.320           | 128     | No insert       |         |                                            |      |                                                     |
|                 |                                 | kga:ST1E_0968                                 | <i>Candidatus Kinetoplastibacterium galatii</i> | <i>Candidatus Kinetoplastibacterium galatii</i> TCC219    | 295    | 0.316           | 79      | No insert       |         |                                            |      |                                                     |
|                 |                                 | cbv:U729_1798                                 | <i>Clostridium baratii</i>                      | <i>Clostridium baratii</i> Sullivan                       | 205    | 0.302           | 116     | No insert       |         |                                            |      | Plasmid                                             |
|                 |                                 | gmx:100798343                                 | <i>Glycine max</i> (soybean)                    | <i>Glycine max</i> (soybean)                              | 345    | 0.330           | 112     |                 |         |                                            |      | RefSeq (Assembly: <a href="#">GCF_000004515.4</a> ) |
|                 |                                 | bvt:P613_03425                                | <i>Borrelia valaisiana</i>                      | <i>Borrelia valaisiana</i> Tom4006                        | 466    | 0.333           | 90      | No insert       |         |                                            |      |                                                     |
| cdg:CDB11_18763 | <i>Clostridioides difficile</i> | <i>Clostridioides difficile</i> BI1           | 333                                             | 0.305                                                     | 174    | No insert       |         |                 |         |                                            |      |                                                     |
| DR93_168        | merR                            | pmul:DR93_168                                 | <i>Pasteurella multocida</i>                    | <i>Pasteurella multocida</i> ATCC 43137                   | 65     | 1.000           |         | PmCIATC C 43137 |         |                                            |      |                                                     |
|                 |                                 | pmp:Pmu_15660                                 | <i>Pasteurella multocida</i>                    | <i>Pasteurella multocida</i> 36950                        | 65     | 1.000           | 65      | PmCIATC C 43137 | 1677145 | 1691873                                    | 14.7 |                                                     |
|                 |                                 | pmu:PM1772                                    | <i>Pasteurella multocida</i>                    | <i>Pasteurella multocida</i> subsp. <i>multocida</i> Pm70 | 65     | 1.000           | 65      | PICI            | 1994540 | 2009007                                    | 14.5 | Similar to PmClPm3480                               |
|                 |                                 | pul:NT08PM_1624                               | <i>Pasteurella multocida</i>                    | <i>Pasteurella multocida</i> subsp. <i>multocida</i> 3480 | 65     | 0.985           | 65      | PICI            | 1690704 | 1703854                                    | 13.1 |                                                     |
|                 |                                 | aap:NT05HA_2319                               | <i>Aggregatibacter aphrophilus</i>              | <i>Aggregatibacter aphrophilus</i> NJ8700                 | 63     | 0.390           | 59      | PICI            | 1811901 | 1821358                                    | 9.4  |                                                     |
|                 |                                 | asu:Asuc_1205                                 | <i>Actinobacillus succinogenes</i>              | <i>Actinobacillus succinogenes</i> 130Z                   | 61     | 0.393           | 56      | No insert       |         |                                            |      |                                                     |
|                 |                                 | emu:EMQU_1667                                 | <i>Enterococcus mundtii</i>                     | <i>Enterococcus mundtii</i> QU 25                         | 152    | 0.385           | 52      | No insert       |         |                                            |      |                                                     |

| PmCIATCC<br>43137 | Function | Orthologs           | Species                                           | Full name                                                                                 | Length | Similarity | Overlap | Element            | Start   | End     | Size | Comments                                                  |
|-------------------|----------|---------------------|---------------------------------------------------|-------------------------------------------------------------------------------------------|--------|------------|---------|--------------------|---------|---------|------|-----------------------------------------------------------|
|                   |          | tin:Tint_1645       | <i>Thiomonas intermedia</i>                       | <i>Thiomonas intermedia</i> K12                                                           | 73     | 0.339      | 62      | No insert          |         |         |      |                                                           |
|                   |          | dly:Dehly_1676      | <i>Dehalogenimonas lykanthroporepellens</i>       | <i>Dehalogenimonas lykanthroporepellens</i> BL-DC-9                                       | 119    | 0.351      | 57      | Prophage           |         |         |      |                                                           |
|                   |          | thi:THI_3204        | <i>Thiomonas arsenitoxydans</i>                   | <i>Thiomonas arsenitoxydans</i>                                                           | 73     | 0.323      | 62      | No insert          |         |         |      |                                                           |
|                   |          | gsb:GSUB_10080      | <i>Geoalkalibacter subterraneus</i>               | <i>Geoalkalibacter subterraneus</i> Red1                                                  | 69     | 0.377      | 53      | Prophage           |         |         |      |                                                           |
| DR93_167          |          | pmul:DR93_167       | <i>Pasteurella multocida</i>                      | <i>Pasteurella multocida</i> ATCC 43137                                                   | 140    | 1.000      |         | PmCIATC<br>C 43137 |         |         |      |                                                           |
|                   |          | pmp:Pmu_15650       | <i>Pasteurella multocida</i>                      | <i>Pasteurella multocida</i> 36950                                                        | 140    | 1.000      | 140     | PmCIATC<br>C 43137 | 1677145 | 1691873 | 14.7 |                                                           |
|                   |          | pmu:PM1773          | <i>Pasteurella multocida</i>                      | <i>Pasteurella multocida</i> subsp. <i>multocida</i> Pm70                                 | 140    | 0.979      | 140     | PICI               | 1994540 | 2009007 | 14.5 | Similar to PmCIPm3480                                     |
|                   |          | pul:NT08PM_1623     | <i>Pasteurella multocida</i>                      | <i>Pasteurella multocida</i> subsp. <i>multocida</i> 3480                                 | 140    | 0.964      | 85      | PICI               | 1690704 | 1703854 | 13.1 |                                                           |
|                   |          | etc:ETAC_13005      | <i>Edwardsiella piscicida</i>                     | <i>Edwardsiella piscicida</i> C07-087                                                     | 144    | 0.329      | 85      | PICI               | 2913709 | 2929995 | 16.3 |                                                           |
|                   |          | pge:LG71_03425      | <i>Pluralibacter gergoviae</i>                    | <i>Pluralibacter gergoviae</i> FB2                                                        | 144    | 0.329      | 92      | Prophage           |         |         |      | Tail protein                                              |
|                   |          | yef:FORC2_0765      | <i>Yersinia enterocolitica</i>                    | <i>Yersinia enterocolitica</i> FORC_002                                                   | 129    | 0.315      | 85      | PICI?              | 869225  | 883876  | 14.6 | Tail protein                                              |
|                   |          | pec:W5S_3563        | <i>Pectobacterium</i>                             | <i>Pectobacterium</i> sp. SCC3193                                                         | 143    | 0.306      | 85      | Defective<br>PICI  |         |         |      |                                                           |
|                   |          | senc:SEET0819_22135 | <i>Salmonella enterica</i> subsp. <i>enterica</i> | <i>Salmonella enterica</i> subsp. <i>enterica</i> serovar <i>Tennessee</i> TXSC_TXSC08-19 | 144    | 0.318      | 85      | PICI?              | 4601635 | 4620336 | 18.7 | Tail protein                                              |
|                   |          | sbc:SbBS512_E4075   | <i>Shigella boydii</i>                            | <i>Shigella boydii</i> CDC 3083-94                                                        | 143    | 0.318      | 85      | Defective<br>PICI  | 3800221 | 3813466 | 13   | Transposases                                              |
|                   |          | eta:ETA_24300       | <i>Erwinia tasmaniensis</i>                       | <i>Erwinia tasmaniensis</i> Et1/99                                                        | 138    | 0.306      | 85      | PICI?              | 2728486 | 2741458 | 13   | Tail protein                                              |
| DR93_166          | Rha      | pmul:DR93_166       | <i>Pasteurella multocida</i>                      | <i>Pasteurella multocida</i> ATCC 43137                                                   | 239    | 1.000      |         | PmCIATC<br>C 43137 |         |         |      |                                                           |
|                   |          | pmp:Pmu_15640       | <i>Pasteurella multocida</i>                      | <i>Pasteurella multocida</i> 36950                                                        | 239    | 1.000      | 239     | PmCIATC<br>C 43137 | 1677145 | 1691873 | 14.7 |                                                           |
|                   |          | pul:NT08PM_1622     | <i>Pasteurella multocida</i>                      | <i>Pasteurella multocida</i> subsp. <i>multocida</i> 3480                                 | 239    | 0.912      | 239     | PICI               | 1690704 | 1703854 | 13.1 |                                                           |
|                   |          | pmu:PM1774          | <i>Pasteurella multocida</i>                      | <i>Pasteurella multocida</i> subsp. <i>multocida</i> Pm70                                 | 239    | 0.883      | 239     | PICI               | 1994540 | 2009007 | 14.5 | Similar to PmCIPm3480                                     |
|                   |          | mhat:B824_10850     | <i>Mannheimia haemolytica</i>                     | <i>Mannheimia haemolytica</i> USDA-ARS-USMARC-184                                         | 222    | 0.668      | 214     | PICI               | 1058301 | 1066853 | 8.5  |                                                           |
|                   |          | hia:H733_0898       | <i>Haemophilus influenzae</i>                     | <i>Haemophilus influenzae</i> CGSHiCZ412602                                               | 227    | 0.656      | 212     | Defective<br>PICI  |         |         |      |                                                           |
|                   |          | aeu:ACEE_02550      | <i>Actinobacillus equuli</i>                      | <i>Actinobacillus equuli</i> subsp. <i>equuli</i> 19392                                   | 233    | 0.650      | 214     | PICI?              | 557158  | 568179  | 11   | Not commun structure                                      |
|                   |          | asi:ASU2_00405      | <i>Actinobacillus suis</i>                        | <i>Actinobacillus suis</i> H91-0380                                                       | 233    | 0.645      | 214     | PICI?              | 73077   | 80675   | 7.6  | Not commun structure                                      |
|                   |          | ass:ASU1_00410      | <i>Actinobacillus suis</i>                        | <i>Actinobacillus suis</i> ATCC 33415                                                     | 233    | 0.645      | 214     | PICI?              | 73071   | 82984   | 9.9  | Not commun structure                                      |
|                   |          | mham:J450_1860      | <i>Mannheimia haemolytica</i>                     | <i>Mannheimia haemolytica</i> D171                                                        | 202    | 0.668      | 199     | PICI?              | 2445215 | 2453749 | 8.5  | Same as <i>Mannheimia haemolytica</i> USDA-ARS-USMARC-184 |
|                   |          | aacn:AANUM_0892     | <i>Aggregatibacter actinomycetemcomitans</i>      | <i>Aggregatibacter actinomycetemcomitans</i> NUM4039                                      | 228    | 0.537      | 205     | PICI?              | 855426  | 865368  | 9.9  | No primase                                                |
| DR93_165          |          | pmul:DR93_165       | <i>Pasteurella multocida</i>                      | <i>Pasteurella multocida</i> ATCC 43137                                                   | 92     | 1.000      |         | PmCIATC<br>C 43137 |         |         |      |                                                           |
|                   |          | pmp:Pmu_15630       | <i>Pasteurella multocida</i>                      | <i>Pasteurella multocida</i> 36950                                                        | 92     | 1.000      | 92      | PmCIATC<br>C 43137 | 1677145 | 1691873 | 14.7 |                                                           |
|                   |          | pmu:PM1775          | <i>Pasteurella multocida</i>                      | <i>Pasteurella multocida</i> subsp. <i>multocida</i> Pm70                                 | 92     | 0.935      | 92      | PICI               | 1994540 | 2009007 | 14.5 | Similar to PmCIPm3480                                     |

| PmCIATCC<br>43137 | Function | Orthologs            | Species                                      | Full name                                                 | Length | Similarity | Overlap | Element            | Start   | End     | Size | Comments                                                         |
|-------------------|----------|----------------------|----------------------------------------------|-----------------------------------------------------------|--------|------------|---------|--------------------|---------|---------|------|------------------------------------------------------------------|
|                   |          | pul:NT08PM_1<br>621  | <i>Pasteurella multocida</i>                 | <i>Pasteurella multocida</i> subsp. <i>multocida</i> 3480 | 95     | 0.925      | 93      | PICI               | 1690704 | 1703854 | 13.1 |                                                                  |
|                   |          | swd:Swoo_385<br>0    | <i>Shewanella woodyi</i>                     | <i>Shewanella woodyi</i> ATCC 51908                       | 470    | 0.306      | 85      | No insert          |         |         |      |                                                                  |
|                   |          | tva:TVAG_244<br>940  | <i>Trichomonas vaginalis</i>                 | <i>Trichomonas vaginalis</i> G3                           | 2416   | 0.302      | 86      |                    |         |         |      | RefSeq (Assembly: <a href="#">GCF_000002825.2</a> )              |
|                   |          | pjd:Pjdr2_4470       | <i>Paenibacillus</i>                         | <i>Paenibacillus</i> sp. <i>JDR-2</i>                     | 721    | 0.339      | 56      | No insert          |         |         |      |                                                                  |
|                   |          | cbv:U729_120<br>0    | <i>Clostridium baratii</i>                   | <i>Clostridium baratii</i> Sullivan                       | 218    | 0.381      | 42      | No insert          |         |         |      |                                                                  |
|                   |          | tch:CHITON_0<br>004  | <i>Thermococcus chitonophagus</i>            | <i>Thermococcus chitonophagus</i> 1                       | 589    | 0.333      | 84      | No insert          |         |         |      |                                                                  |
|                   |          | bvg:10490153<br>7    | <i>Beta vulgaris</i>                         | <i>Beta vulgaris</i> subsp. <i>vulgaris</i> (sugar beet)  | 853    | 0.321      | 56      |                    |         |         |      | RefSeq (Assembly: <a href="#">GCF_000511025.1</a> )              |
|                   |          | riv:Riv7116_24<br>25 | <i>Rivularia</i>                             | <i>Rivularia</i> sp. <i>PCC 7116</i>                      | 563    | 0.462      | 39      | No insert          |         |         |      |                                                                  |
| DR93_164          |          | pmul:DR93_16<br>4    | <i>Pasteurella multocida</i>                 | <i>Pasteurella multocida</i> ATCC 43137                   | 91     | 1.000      |         | PmCIATC<br>C 43137 |         |         |      |                                                                  |
|                   |          | pmp:Pmu_156<br>10    | <i>Pasteurella multocida</i>                 | <i>Pasteurella multocida</i> 36950                        | 95     | 1.000      | 91      | PmCIATC<br>C 43137 | 1677145 | 1691873 | 14.7 |                                                                  |
|                   |          | pmu:PM1776           | <i>Pasteurella multocida</i>                 | <i>Pasteurella multocida</i> subsp. <i>multocida</i> Pm70 | 95     | 0.945      | 91      | PICI               | 1994540 | 2009007 | 14.5 | Similar to PmCIPm3480                                            |
|                   |          | aan:D7S_0141<br>4    | <i>Aggregatibacter actinomycetemcomitans</i> | <i>Aggregatibacter actinomycetemcomitans</i> D7S-1        | 91     | 0.371      | 89      | PICI               | 1321056 | 1330241 | 9.2  |                                                                  |
|                   |          | mvr:X781_111<br>80   | <i>Mannheimia</i> sp.                        | <i>Mannheimia</i> sp. <i>USDA-ARS-USMARC-1261</i>         | 87     | 0.429      | 91      | PICI?              | 1128249 | 1143315 | 15   | Not commun structure; <i>terL</i>                                |
|                   |          | hif:HIBPF_067<br>32  | <i>Haemophilus influenzae</i>                | <i>Haemophilus influenzae</i> F3031                       | 98     | 0.323      | 96      | PICI?              | 617232  | 628294  | 11   | Not commun structure                                             |
|                   |          | hil:HICON_152<br>20  | <i>Haemophilus influenzae</i>                | <i>Haemophilus influenzae</i> F3047                       | 100    | 0.313      | 99      | PICI?              | 1359833 | 1373077 | 13.2 | Not commun structure; similar to <i>H.influenzae</i> F3031       |
|                   |          | hiu:HIB_05670        | <i>Haemophilus influenzae</i>                | <i>Haemophilus influenzae</i> 10810                       | 94     | 0.333      | 93      | PICI?              | 563371  | 577256  | 13.8 | Not commun structure                                             |
|                   |          | mham:J450_1<br>1855  | <i>Mannheimia haemolytica</i>                | <i>Mannheimia haemolytica</i> D171                        | 95     | 0.310      | 84      | PICI?              | 2445215 | 2453749 | 8.5  | Same as <i>Mannheimia haemolytica</i> <i>USDA-ARS-USMARC-184</i> |
|                   |          | mhat:B824_10<br>840  | <i>Mannheimia haemolytica</i>                | <i>Mannheimia haemolytica</i> <i>USDA-ARS-USMARC-184</i>  | 83     | 0.312      | 80      | PICI               | 1058301 | 1066853 | 8.5  |                                                                  |
|                   |          | aqu:10531404<br>3    | <i>Amphimedon</i>                            | <i>Amphimedon queenslandica</i>                           | 436    | 0.347      | 49      |                    |         |         |      | RefSeq (Assembly: <a href="#">GCF_000090795.1</a> )              |
| DR93_163          |          | pmul:DR93_16<br>3    | <i>Pasteurella multocida</i>                 | <i>Pasteurella multocida</i> ATCC 43137                   | 120    | 1.000      |         | PmCIATC<br>C 43137 |         |         |      |                                                                  |
|                   |          | pmp:Pmu_156<br>00    | <i>Pasteurella multocida</i>                 | <i>Pasteurella multocida</i> 36950                        | 120    | 1.000      | 120     | PmCIATC<br>C 43137 | 1677145 | 1691873 | 14.7 |                                                                  |
|                   |          | pul:NT08PM_1<br>619  | <i>Pasteurella multocida</i>                 | <i>Pasteurella multocida</i> subsp. <i>multocida</i> 3480 | 120    | 1.000      | 120     | PICI               | 1690704 | 1703854 | 13.1 |                                                                  |
|                   |          | aacn:AANUM_0889      | <i>Aggregatibacter actinomycetemcomitans</i> | <i>Aggregatibacter actinomycetemcomitans</i> NUM4039      | 124    | 0.646      | 99      | PICI?              | 855426  | 865368  | 9.9  | No primase                                                       |
|                   |          | hia:H733_0899        | <i>Haemophilus influenzae</i>                | <i>Haemophilus influenzae</i> CGSHiCZ412602               | 124    | 0.616      | 99      | PICI?              | 972960  | 980869  | 7.9  |                                                                  |
|                   |          | aan:D7S_0141<br>5    | <i>Aggregatibacter actinomycetemcomitans</i> | <i>Aggregatibacter actinomycetemcomitans</i> D7S-1        | 127    | 0.555      | 110     | PICI               | 1321056 | 1330241 | 9.2  |                                                                  |
|                   |          | aap:NT05HA_1832      | <i>Aggregatibacter aphrophilus</i>           | <i>Aggregatibacter aphrophilus</i> NJ8700                 | 127    | 0.555      | 110     | PICI               | 1811901 | 1821358 | 9.4  |                                                                  |
|                   |          | aeu:ACEE_02<br>555   | <i>Actinobacillus equuli</i>                 | <i>Actinobacillus equuli</i> subsp. <i>equuli</i> 19392   | 127    | 0.492      | 124     | PICI?              | 557158  | 568179  | 11   | Not commun structure                                             |
|                   |          | asi:ASU2_004<br>00   | <i>Actinobacillus suis</i>                   | <i>Actinobacillus suis</i> H91-0380                       | 127    | 0.480      | 125     | PICI?              | 73077   | 80675   | 7.6  | Not commun structure                                             |
|                   |          | ass:ASU1_004<br>05   | <i>Actinobacillus suis</i>                   | <i>Actinobacillus suis</i> ATCC 33415                     | 127    | 0.480      | 125     | PICI?              | 73071   | 82984   | 9.9  | Not commun structure                                             |
|                   |          | kpb:FH42_073<br>75   | <i>Klebsiella pneumoniae</i>                 | <i>Klebsiella pneumoniae</i> blaNDM-1                     | 934    | 0.324      | 102     | No insert          |         |         |      |                                                                  |

| PmCIATCC<br>43137  | Function                   | Orthologs                                           | Species                                      | Full name                                                 | Length | Similarity | Overlap | Element            | Start   | End     | Size                 | Comments                   |                                            |
|--------------------|----------------------------|-----------------------------------------------------|----------------------------------------------|-----------------------------------------------------------|--------|------------|---------|--------------------|---------|---------|----------------------|----------------------------|--------------------------------------------|
| DR93_162           | ash                        | pmul:DR93_16<br>2                                   | <i>Pasteurella multocida</i>                 | <i>Pasteurella multocida</i> ATCC 43137                   | 186    | 1.000      |         | PmCIATC<br>C 43137 |         |         |                      |                            |                                            |
|                    |                            | pmp:Pmu_155<br>90                                   | <i>Pasteurella multocida</i>                 | <i>Pasteurella multocida</i> 36950                        | 186    | 1.000      | 186     | PmCIATC<br>C 43137 | 1677145 | 1691873 | 14.7                 |                            |                                            |
|                    |                            | pul:NT08PM_1<br>618                                 | <i>Pasteurella multocida</i>                 | <i>Pasteurella multocida</i> subsp. <i>multocida</i> 3480 | 186    | 1.000      | 186     | PICI               | 1690704 | 1703854 | 13.1                 |                            |                                            |
|                    |                            | pmu:PM1778                                          | <i>Pasteurella multocida</i>                 | <i>Pasteurella multocida</i> subsp. <i>multocida</i> Pm70 | 186    | 0.962      | 186     | PICI               | 1994540 | 2009007 | 14.5                 | Similar to PmCIPm3480      |                                            |
|                    |                            | aap:NT05HA_2318                                     | <i>Aggregatibacter aphrophilus</i>           | <i>Aggregatibacter aphrophilus</i> NJ8700                 | 182    | 0.481      | 185     | PICI               | 2254923 | 2263135 | 8.2                  |                            |                                            |
|                    |                            | mhae:F382_00<br>545                                 | <i>Mannheimia haemolytica</i>                | <i>Mannheimia haemolytica</i> D153                        | 353    | 0.444      | 160     | Defective<br>PICI? |         |         |                      |                            | No primase; two integrases                 |
|                    |                            | mhal:N220_07<br>655                                 | <i>Mannheimia haemolytica</i>                | <i>Mannheimia haemolytica</i> USMARC_2286                 | 353    | 0.444      | 160     | Defective<br>PICI? |         |         |                      |                            | Same as <i>Mannheimia haemolytica</i> D153 |
|                    |                            | mhao:J451_00<br>515                                 | <i>Mannheimia haemolytica</i>                | <i>Mannheimia haemolytica</i> D174                        | 353    | 0.444      | 160     | Defective<br>PICI? |         |         |                      |                            | Same as <i>Mannheimia haemolytica</i> D153 |
|                    |                            | mhq:D650_15<br>250                                  | <i>Mannheimia haemolytica</i>                | <i>Mannheimia haemolytica</i> USDA-ARS-<br>USMARC-183     | 353    | 0.444      | 160     | Defective<br>PICI? |         |         |                      |                            | Same as <i>Mannheimia haemolytica</i> D153 |
|                    |                            | mhx:MHH_c21<br>280                                  | <i>Mannheimia haemolytica</i>                | <i>Mannheimia haemolytica</i> M42548                      | 353    | 0.444      | 160     | Defective<br>PICI? |         |         |                      |                            | Same as <i>Mannheimia haemolytica</i> D153 |
| mvi:X808_179<br>60 | <i>Mannheimia varigena</i> | <i>Mannheimia varigena</i> USDA-ARS-USMARC-<br>1296 | 188                                          | 0.441                                                     | 161    | PICI       | 1898061 | 1907756            | 9.7     |         |                      |                            |                                            |
| DR93_161           |                            | pmul:DR93_16<br>1                                   | <i>Pasteurella multocida</i>                 | <i>Pasteurella multocida</i> ATCC 43137                   | 131    | 1.000      |         | PmCIATC<br>C 43137 |         |         |                      |                            |                                            |
|                    |                            | pmu:PM1779                                          | <i>Pasteurella multocida</i>                 | <i>Pasteurella multocida</i> subsp. <i>multocida</i> Pm70 | 136    | 0.607      | 140     | PICI               | 1994540 | 2009007 | 14.5                 | Similar to PmCIPm3480      |                                            |
|                    |                            | pul:NT08PM_1<br>617                                 | <i>Pasteurella multocida</i>                 | <i>Pasteurella multocida</i> subsp. <i>multocida</i> 3480 | 73     | 0.808      | 73      | PICI               | 1690704 | 1703854 | 13.1                 |                            |                                            |
|                    |                            | hif:HIBPF_067<br>30                                 | <i>Haemophilus influenzae</i>                | <i>Haemophilus influenzae</i> F3031                       | 320    | 0.485      | 101     | PICI?              | 617232  | 628294  | 11                   | Not commun structure       |                                            |
|                    |                            | hiu:HIB_05620                                       | <i>Haemophilus influenzae</i>                | <i>Haemophilus influenzae</i> 10810                       | 309    | 0.500      | 100     | PICI?              | 563371  | 577256  | 13.8                 | Not commun structure       |                                            |
|                    |                            | aacn:AANUM_0885                                     | <i>Aggregatibacter actinomycetemcomitans</i> | <i>Aggregatibacter actinomycetemcomitans</i><br>NUM4039   | 204    | 0.430      | 107     | PICI?              | 855426  | 865368  | 9.9                  | No primase                 |                                            |
|                    |                            | aan:D7S_0140<br>9                                   | <i>Aggregatibacter actinomycetemcomitans</i> | <i>Aggregatibacter actinomycetemcomitans</i><br>D7S-1     | 267    | 0.430      | 107     | PICI               | 1321056 | 1330241 | 9.2                  |                            |                                            |
|                    |                            | hsm:HSM_023<br>9                                    | <i>Haemophilus somnus</i>                    | <i>Haemophilus somnus</i> 2336                            | 162    | 0.398      | 123     | Defective<br>PICI? |         |         |                      | No integrase               |                                            |
|                    |                            | mvr:X781_110<br>90                                  | <i>Mannheimia</i>                            | <i>Mannheimia</i> sp. USDA-ARS-USMARC-1261                | 149    | 0.416      | 113     | PICI?              | 1128249 | 1143315 | 15                   | Not commun structure; terL |                                            |
|                    |                            | aap:NT05HA_1826                                     | <i>Aggregatibacter aphrophilus</i>           | <i>Aggregatibacter aphrophilus</i> NJ8700                 | 307    | 0.395      | 129     | PICI               | 1811901 | 1821358 | 9.4                  |                            |                                            |
|                    | hso:HS_0528                | <i>Haemophilus somnus</i>                           | <i>Haemophilus somnus</i> 129PT              | 163                                                       | 0.420  | 88         | PICI?   | 562065             | 574352  | 12.3    | Not commun structure |                            |                                            |
| DR93_160           |                            | pmul:DR93_16<br>0                                   | <i>Pasteurella multocida</i>                 | <i>Pasteurella multocida</i> ATCC 43137                   | 108    | 1.000      |         | PmCIATC<br>C 43137 |         |         |                      |                            |                                            |
|                    |                            | pmp:Pmu_155<br>80                                   | <i>Pasteurella multocida</i>                 | <i>Pasteurella multocida</i> 36950                        | 108    | 1.000      | 108     | PmCIATC<br>C 43137 | 1677145 | 1691873 | 14.7                 |                            |                                            |
|                    |                            | pmu:PM1780                                          | <i>Pasteurella multocida</i>                 | <i>Pasteurella multocida</i> subsp. <i>multocida</i> Pm70 | 108    | 0.972      | 108     | PICI               | 1994540 | 2009007 | 14.5                 | Similar to PmCIPm3480      |                                            |
|                    |                            | pul:NT08PM_1<br>616                                 | <i>Pasteurella multocida</i>                 | <i>Pasteurella multocida</i> subsp. <i>multocida</i> 3480 | 108    | 0.917      | 108     | PICI               | 1690704 | 1703854 | 13.1                 |                            |                                            |
|                    |                            | eft:M395_0327<br>0                                  | <i>Enterococcus faecium</i>                  | <i>Enterococcus faecium</i> T110                          | 289    | 0.337      | 98      | No insert          |         |         |                      |                            |                                            |
|                    |                            | efau:EFAU085_00598                                  | <i>Enterococcus faecium</i>                  | <i>Enterococcus faecium</i> Aus0085                       | 289    | 0.337      | 98      | No insert          |         |         |                      |                            |                                            |
|                    |                            | efc:EFAU004_00650                                   | <i>Enterococcus faecium</i>                  | <i>Enterococcus faecium</i> Aus0004                       | 289    | 0.337      | 98      | No insert          |         |         |                      |                            |                                            |

| PmCIATCC<br>43137 | Function    | Orthologs                | Species                                      | Full name                                                 | Length | Similarity | Overlap | Element            | Start   | End     | Size | Comments                                                   |
|-------------------|-------------|--------------------------|----------------------------------------------|-----------------------------------------------------------|--------|------------|---------|--------------------|---------|---------|------|------------------------------------------------------------|
|                   |             | efm:M7W_838              | <i>Enterococcus faecium</i>                  | <i>Enterococcus faecium</i> NRRL B-2354                   | 289    | 0.337      | 98      | No insert          |         |         |      |                                                            |
|                   |             | efu:HMPREF0<br>351_10674 | <i>Enterococcus faecium</i>                  | <i>Enterococcus faecium</i> DO                            | 289    | 0.337      | 98      | No insert          |         |         |      |                                                            |
|                   |             | sbd:ATN00_10<br>730      | <i>Sphingobium baderi</i>                    | <i>Sphingobium baderi</i> DE-13                           | 462    | 0.306      | 108     | No insert          |         |         |      |                                                            |
|                   |             | hvo:HVO_194<br>3         | <i>Haloferax volcanii</i>                    | <i>Haloferax volcanii</i> DS2                             | 746    | 0.305      | 95      | No insert          |         |         |      |                                                            |
| DR93_159          |             | pmul:DR93_15<br>9        | <i>Pasteurella multocida</i>                 | <i>Pasteurella multocida</i> ATCC 43137                   | 144    | 1.000      |         | PmCIATC<br>C 43137 |         |         |      |                                                            |
|                   |             | pmp:Pmu_155<br>70        | <i>Pasteurella multocida</i>                 | <i>Pasteurella multocida</i> 36950                        | 143    | 1.000      | 143     | PmCIATC<br>C 43137 | 1677145 | 1691873 | 14.7 |                                                            |
|                   |             | pmu:PM1781               | <i>Pasteurella multocida</i>                 | <i>Pasteurella multocida</i> subsp. <i>multocida</i> Pm70 | 144    | 0.979      | 144     | PICI               | 1994540 | 2009007 | 14.5 | Similar to PmCIPm3480                                      |
|                   |             | pul:NT08PM_1<br>615      | <i>Pasteurella multocida</i>                 | <i>Pasteurella multocida</i> subsp. <i>multocida</i> 3480 | 143    | 0.958      | 144     | PICI               | 1690704 | 1703854 | 13.1 |                                                            |
|                   |             | aan:D7S_0140<br>6        | <i>Aggregatibacter actinomycetemcomitans</i> | <i>Aggregatibacter actinomycetemcomitans</i> D7S-1        | 169    | 0.443      | 97      | PICI               | 1321056 | 1330241 | 9.2  |                                                            |
|                   |             | aacn:AANUM_0882          | <i>Aggregatibacter actinomycetemcomitans</i> | <i>Aggregatibacter actinomycetemcomitans</i> NUM4039      | 169    | 0.443      | 97      | PICI?              | 855426  | 865368  | 9.9  | No primase                                                 |
|                   |             | aah:CF65_007<br>82       | <i>Aggregatibacter actinomycetemcomitans</i> | <i>Aggregatibacter actinomycetemcomitans</i> HK1651       | 106    | 0.396      | 91      | No insert          |         |         |      | Only integrase                                             |
|                   |             | mhat:B824_46<br>50       | <i>Mannheimia haemolytica</i>                | <i>Mannheimia haemolytica</i> USDA-ARS-USMARC-184         | 79     | 0.462      | 78      | No insert          |         |         |      | Only integrase                                             |
|                   |             | aap:NT05HA_1823          | <i>Aggregatibacter aphrophilus</i>           | <i>Aggregatibacter aphrophilus</i> NJ8700                 | 179    | 0.349      | 106     | PICI               | 1811901 | 1821358 | 9.4  |                                                            |
|                   |             | hil:HICON_151<br>70      | <i>Haemophilus influenzae</i>                | <i>Haemophilus influenzae</i> F3047                       | 227    | 0.317      | 139     | PICI?              | 1359833 | 1373077 | 13.2 | Not commun structure; similar to <i>H.influenzae</i> F3031 |
|                   |             | hif:HIBPF_066<br>90      | <i>Haemophilus influenzae</i>                | <i>Haemophilus influenzae</i> F3031                       | 227    | 0.317      | 139     | PICI?              | 617232  | 628294  | 11   | Not commun structure                                       |
| DR93_158          | <i>pri</i>  | pmul:DR93_15<br>8        | <i>Pasteurella multocida</i>                 | <i>Pasteurella multocida</i> ATCC 43137                   | 725    | 1.000      |         | PmCIATC<br>C 43137 |         |         |      |                                                            |
|                   |             | pmp:Pmu_155<br>60        | <i>Pasteurella multocida</i>                 | <i>Pasteurella multocida</i> 36950                        | 725    | 1.000      | 725     | PmCIATC<br>C 43137 | 1677145 | 1691873 | 14.7 |                                                            |
|                   |             | pul:NT08PM_1<br>614      | <i>Pasteurella multocida</i>                 | <i>Pasteurella multocida</i> subsp. <i>multocida</i> 3480 | 725    | 0.999      | 725     | PICI               | 1690704 | 1703854 | 13.1 |                                                            |
|                   |             | pmu:PM1782               | <i>Pasteurella multocida</i>                 | <i>Pasteurella multocida</i> subsp. <i>multocida</i> Pm70 | 725    | 0.992      | 725     | PICI               | 1994540 | 2009007 | 14.5 | Similar to PmCIPm3480                                      |
|                   |             | hpas:JL26_02<br>260      | <i>Haemophilus parasuis</i>                  | <i>Haemophilus parasuis</i> SH03                          | 724    | 0.532      | 726     | PICI?              | 395669  | 4055177 | 9.8  | Not commun structure                                       |
|                   |             | hpaz:K756_02<br>740      | <i>Haemophilus parasuis</i>                  | <i>Haemophilus parasuis</i> ZJ0906                        | 724    | 0.530      | 726     | PICI?              | 515457  | 524474  | 9    | Not commun structure; similar to <i>H. parasuis</i> SH03   |
|                   |             | hap:HAPS_15<br>81        | <i>Haemophilus parasuis</i>                  | <i>Haemophilus parasuis</i> SH0165                        | 728    | 0.528      | 726     | PICI?              | 781463  | 790311  | 8.8  | Not commun structure                                       |
|                   |             | hpak:JT17_11<br>140      | <i>Haemophilus parasuis</i>                  | <i>Haemophilus parasuis</i> KL0318                        | 728    | 0.517      | 726     | PICI?              | 2198349 | 2207437 | 9.1  | Not commun structure; similar to <i>H. parasuis</i> SH03   |
|                   |             | hif:HIBPF_066<br>80      | <i>Haemophilus influenzae</i>                | <i>Haemophilus influenzae</i> F3031                       | 730    | 0.489      | 736     | PICI?              | 617232  | 628294  | 11   | Not commun structure                                       |
|                   |             | hil:HICON_151<br>60      | <i>Haemophilus influenzae</i>                | <i>Haemophilus influenzae</i> F3047                       | 730    | 0.488      | 735     | PICI?              | 1359833 | 1373077 | 13.2 | Not commun structure; similar to <i>H.influenzae</i> F3031 |
|                   |             | kqu:AVR78_10<br>885      | <i>Klebsiella quasipneumoniae</i>            | <i>Klebsiella quasipneumoniae</i> ATCC 700603             | 704    | 0.429      | 721     | PICI               | 5087576 | 5108642 | 21   |                                                            |
| DR93_157          | <i>abfF</i> | pmul:DR93_15<br>7        | <i>Pasteurella multocida</i>                 | <i>Pasteurella multocida</i> ATCC 43137                   | 316    | 1.000      |         | PmCIATC<br>C 43137 |         |         |      |                                                            |
|                   |             | pmp:Pmu_155<br>50        | <i>Pasteurella multocida</i>                 | <i>Pasteurella multocida</i> 36950                        | 316    | 1.000      | 316     | PmCIATC<br>C 43137 | 1677145 | 1691873 | 14.7 |                                                            |
|                   |             | pul:NT08PM_1<br>613      | <i>Pasteurella multocida</i>                 | <i>Pasteurella multocida</i> subsp. <i>multocida</i> 3480 | 316    | 0.997      | 316     | PICI               | 1690704 | 1703854 | 13.1 |                                                            |

| PmCIATCC<br>43137 | Function | Orthologs                  | Species                               | Full name                                                                        | Length | Similarity | Overlap | Element             | Start   | End     | Size | Comments              |
|-------------------|----------|----------------------------|---------------------------------------|----------------------------------------------------------------------------------|--------|------------|---------|---------------------|---------|---------|------|-----------------------|
|                   |          | pmu:PM1783                 | <i>Pasteurella multocida</i>          | <i>Pasteurella multocida</i> subsp. <i>multocida</i> Pm70                        | 316    | 0.994      | 316     | PICI                | 1994540 | 2009007 | 14.5 | Similar to PmCIPm3480 |
|                   |          | mhae:F382_09<br>970        | <i>Mannheimia haemolytica</i>         | <i>Mannheimia haemolytica</i> D153                                               | 315    | 0.521      | 313     | No insert           |         |         |      |                       |
|                   |          | mhal:N220_02<br>070        | <i>Mannheimia haemolytica</i>         | <i>Mannheimia haemolytica</i> USMARC_2286                                        | 315    | 0.521      | 313     | No insert           |         |         |      |                       |
|                   |          | mham:J450_0<br>8895        | <i>Mannheimia haemolytica</i>         | <i>Mannheimia haemolytica</i> D171                                               | 315    | 0.521      | 313     | No insert           |         |         |      |                       |
|                   |          | mhao:J451_10<br>190        | <i>Mannheimia haemolytica</i>         | <i>Mannheimia haemolytica</i> D174                                               | 315    | 0.521      | 313     | No insert           |         |         |      |                       |
|                   |          | mhaq:WC39_1<br>1775        | <i>Mannheimia haemolytica</i>         | <i>Mannheimia haemolytica</i> 89010807N                                          | 315    | 0.521      | 313     | No insert           |         |         |      |                       |
|                   |          | mhat:B824_22<br>520        | <i>Mannheimia haemolytica</i>         | <i>Mannheimia haemolytica</i> USDA-ARS-<br>USMARC-184                            | 315    | 0.521      | 313     | No insert           |         |         |      |                       |
|                   |          | mhay:VK67_1<br>1780        | <i>Mannheimia haemolytica</i>         | <i>Mannheimia haemolytica</i> 89010807N lktA-                                    | 315    | 0.521      | 313     | No insert           |         |         |      |                       |
| DR93_156          |          | pmul:DR93_15<br>6          | <i>Pasteurella multocida</i>          | <i>Pasteurella multocida</i> ATCC 43137                                          | 349    | 1.000      |         | PmCIATC<br>C 43137  |         |         |      |                       |
|                   |          | pmp:Pmu_155<br>40          | <i>Pasteurella multocida</i>          | <i>Pasteurella multocida</i> 36950                                               | 349    | 1.000      | 349     | PmCIATC<br>C 43137  | 1677145 | 1691873 | 14.7 |                       |
|                   |          | eec:EcWSU1_<br>02439       | <i>Enterobacter cloacae</i>           | <i>Enterobacter cloacae</i> EcWSU1                                               | 353    | 0.531      | 354     | Defective<br>phage? |         |         |      |                       |
|                   |          | ecf:ECH74115<br>_3238      | <i>Escherichia coli</i>               | <i>Escherichia coli</i> O157:H7 EC4115                                           | 353    | 0.537      | 352     | Prophage            |         |         |      |                       |
|                   |          | ecp:ECP_1145               | <i>Escherichia coli</i>               | <i>Escherichia coli</i> O6:K15:H31 536                                           | 353    | 0.537      | 352     | Prophage            |         |         |      |                       |
|                   |          | ese:ECSF_104<br>8          | <i>Escherichia coli</i>               | <i>Escherichia coli</i> O150:H5 SE15                                             | 357    | 0.537      | 352     | Prophage            |         |         |      |                       |
|                   |          | etw:ECSF_298<br>2          | <i>Escherichia coli</i>               | <i>Escherichia coli</i> O157:H7 TW14359                                          | 353    | 0.537      | 352     | Prophage            |         |         |      |                       |
|                   |          | senj:CFSAN00<br>1992_20510 | <i>Salmonella enterica</i>            | <i>Salmonella enterica</i> subsp. <i>enterica</i> serovar<br>Javiana CFSAN001992 | 353    | 0.511      | 352     | Prophage            |         |         |      |                       |
|                   |          | eok:G2583_06<br>68         | <i>Escherichia coli</i>               | <i>Escherichia coli</i> O55:H7 CB9615                                            | 353    | 0.534      | 352     | Prophage            |         |         |      |                       |
|                   |          | eln:NRG857_0<br>5550       | <i>Escherichia coli</i>               | <i>Escherichia coli</i> O83:H1 NRG 857C                                          | 353    | 0.534      | 352     | Prophage            |         |         |      |                       |
|                   |          | vv:VV93_v1c4<br>1070       | <i>Vibrio vulnificus</i>              | <i>Vibrio vulnificus</i> 93U204                                                  | 351    | 0.490      | 349     | No insert           |         |         |      |                       |
| DR93_155          |          | pmul:DR93_15<br>5          | <i>Pasteurella multocida</i>          | <i>Pasteurella multocida</i> ATCC 43137                                          | 124    | 1.000      |         | PmCIATC<br>C 43137  |         |         |      |                       |
|                   |          | pmp:Pmu_155<br>30          | <i>Pasteurella multocida</i>          | <i>Pasteurella multocida</i> 36950                                               | 124    | 1.000      | 124     | PmCIATC<br>C 43137  | 1677145 | 1691873 | 14.7 |                       |
|                   |          | lrz:BJ169_0608<br>0        | <i>Luteibacter rhizovicius</i>        | <i>Luteibacter rhizovicius</i> LJ96T                                             | 124    | 0.565      | 124     | No insert           |         |         |      |                       |
|                   |          | pao:Pat9b_343<br>8         | <i>Pantoea</i>                        | <i>Pantoea</i> sp. At-9b                                                         | 123    | 0.553      | 123     | Prophage            |         |         |      |                       |
|                   |          | aat:EP13_181<br>85         | <i>Alteromonas australica</i>         | <i>Alteromonas australica</i> H 17                                               | 125    | 0.577      | 123     | No insert           |         |         |      |                       |
|                   |          | ddd:Dda3937_<br>01763      | <i>Dickeya dadantii</i>               | <i>Dickeya dadantii</i> 3937                                                     | 126    | 0.561      | 123     | Prophage            |         |         |      |                       |
|                   |          | vv:VV93_v1c4<br>1080       | <i>Vibrio vulnificus</i>              | <i>Vibrio vulnificus</i> 93U204                                                  | 132    | 0.565      | 124     | No insert           |         |         |      |                       |
|                   |          | shal:SHALO_2<br>495        | <i>Sulfurospirillum halorespirans</i> | <i>Sulfurospirillum halorespirans</i> DSM 13726                                  | 124    | 0.537      | 123     | No insert           |         |         |      |                       |
|                   |          | ecp:ECP_1144               | <i>Escherichia coli</i>               | <i>Escherichia coli</i> O6:K15:H31 536                                           | 125    | 0.537      | 123     | Prophage            |         |         |      |                       |
|                   |          | eln:NRG857_0<br>5545       | <i>Escherichia coli</i>               | <i>Escherichia coli</i> O83:H1 NRG 857C                                          | 125    | 0.537      | 123     | Prophage            |         |         |      |                       |
|                   |          | eok:G2583_06<br>67         | <i>Escherichia coli</i>               | <i>Escherichia coli</i> O55:H7 CB9615                                            | 125    | 0.537      | 123     | Prophage            |         |         |      |                       |



| PmCIATCC<br>43137 | Function | Orthologs         | Species                      | Full name                               | Length | Similarity | Overlap | Element            | Start | End | Size | Comments                    |
|-------------------|----------|-------------------|------------------------------|-----------------------------------------|--------|------------|---------|--------------------|-------|-----|------|-----------------------------|
| DR93_154          |          | pmul:DR93_15<br>4 | <i>Pasteurella multocida</i> | <i>Pasteurella multocida</i> ATCC 43137 | 31     |            |         | PmCIATC<br>C 43137 |       |     |      | No matches in database (DB) |

**Table S5. P4 orthologies.**

| P4      | Function   | Orthologs             | Species                           | Full name                                                                               | Length | Similarity | Overlap | Element           | Start   | End     | Size | Comments                                             |
|---------|------------|-----------------------|-----------------------------------|-----------------------------------------------------------------------------------------|--------|------------|---------|-------------------|---------|---------|------|------------------------------------------------------|
| 1261092 | <i>int</i> | vg:1261092            |                                   | <i>Enterobacteria phage P4</i>                                                          | 439    | 1.000      |         |                   |         |         |      |                                                      |
|         |            | eih:ECOK1_4788        | <i>Escherichia coli</i>           | <i>Escherichia coli</i> IHE3034                                                         | 422    | 0.995      | 410     | P4-like           | 4929672 | 4941310 | 11.6 |                                                      |
|         |            | csj:CSK29544_02175    | <i>Cronobacter sakazakii</i>      | <i>Cronobacter sakazakii</i> ATCC 29544                                                 | 420    | 0.943      | 420     | Defective P4-like |         |         |      | Only <i>int</i> , <i>psu</i> and <i>pri</i> fragment |
|         |            | senn:SN31241_8570     | <i>Salmonella enterica</i>        | <i>Salmonella enterica</i> subsp. <i>enterica</i> serovar <i>Newport</i> USMARC-S3124.1 | 425    | 0.954      | 414     | P4-like           | 867520  | 879568  | 12   |                                                      |
|         |            | ron:TE10_04950        | <i>Raoultella ornithinolytica</i> | <i>Raoultella ornithinolytica</i> S12                                                   | 421    | 0.961      | 410     | P4-like           | 1067123 | 1079262 | 12.1 |                                                      |
|         |            | sent:TY21A_22985      | <i>Salmonella enterica</i>        | <i>Salmonella enterica</i> subsp. <i>enterica</i> serovar <i>Typhi</i> Ty21a            | 421    | 0.961      | 410     | P4-like           | 4666556 | 4677971 | 11.4 |                                                      |
|         |            | stt:t4518             | <i>Salmonella enterica</i>        | <i>Salmonella enterica</i> subsp. <i>enterica</i> serovar <i>Typhi</i> Ty2              | 421    | 0.961      | 410     | P4-like           | 4666559 | 4677974 | 11.4 |                                                      |
|         |            | sty:STY4821           | <i>Salmonella enterica</i>        | <i>Salmonella enterica</i> subsp. <i>enterica</i> serovar <i>Typhi</i> CT18             | 421    | 0.961      | 410     | P4-like           | 4683670 | 4695086 | 11.4 |                                                      |
|         |            | eclo:ENC_43890        | <i>Enterobacter cloacae</i>       | <i>Enterobacter cloacae</i> subsp. <i>cloacae</i> NCTC 9394                             | 418    | 0.940      | 418     | P4-like           | 4472603 | 4482957 | 10.5 | Draft genome                                         |
|         |            | seeb:SEE B0189_019950 | <i>Salmonella enterica</i>        | <i>Salmonella enterica</i> subsp. <i>enterica</i> serovar <i>Bareilly</i> CFSAN000189   | 419    | 0.963      | 410     | P4-like           | 4089428 | 4101526 | 12   |                                                      |
|         |            | csi:P262_05052        | <i>Cronobacter sakazakii</i>      | <i>Cronobacter sakazakii</i> CMCC 45402                                                 | 425    | 0.937      | 414     | P4-like           | 3760642 | 3771860 | 11.2 |                                                      |
|         |            | sek:SSPA3984          | <i>Salmonella enterica</i>        | <i>Salmonella enterica</i> subsp. <i>enterica</i> serovar <i>Paratyphi</i> A AKU1260    | 419    | 0.961      | 410     | P4-like           | 4456338 | 4466061 | 9.7  |                                                      |
|         |            | spt:SPA4288           | <i>Salmonella enterica</i>        | <i>Salmonella enterica</i> subsp. <i>enterica</i> serovar <i>Paratyphi</i> A ATCC9150   | 419    | 0.961      | 410     | P4-like           | 4461107 | 4470831 | 9.7  |                                                      |
|         |            | sbo:SBO_4174          | <i>Shigella boydii</i>            | <i>Shigella boydii</i> Sb227                                                            | 421    | 0.956      | 410     | P4-like           | 4217005 | 4228846 | 11.8 |                                                      |
|         |            | kpz:KPNIH27_02710     | <i>Klebsiella pneumoniae</i>      | <i>Klebsiella pneumoniae</i> subsp. <i>pneumoniae</i> KPNIH27                           | 423    | 0.954      | 410     | P4-like           | 576483  | 588499  | 12   |                                                      |
|         |            | eoj:ECO26_5435        | <i>Escherichia coli</i>           | <i>Escherichia coli</i> O26:H11 11368                                                   | 420    | 0.949      | 410     | P4-like           | 5524027 | 5538050 | 14   |                                                      |
|         |            | etr:ETA_3092          | <i>Edwardsiella tarda</i>         | <i>Edwardsiella tarda</i> EIB202                                                        | 420    | 0.959      | 410     | Defective P4-like |         |         |      | Only <i>int</i> , <i>psu</i> and <i>sid</i>          |
|         |            | kpa:KPNJ1_04920       | <i>Klebsiella pneumoniae</i>      | <i>Klebsiella pneumoniae</i> 30660/NJST258_1                                            | 420    | 0.954      | 410     | P4-like           | 4695067 | 4706266 | 11.2 |                                                      |
|         |            | kpc:KPNIH10_02775     | <i>Klebsiella pneumoniae</i>      | <i>Klebsiella pneumoniae</i> subsp. <i>pneumoniae</i> KPNIH10                           | 420    | 0.954      | 410     | P4-like           | 585958  | 597158  | 11.2 |                                                      |
|         |            | kpg:KPNIH32_02935     | <i>Klebsiella pneumoniae</i>      | <i>Klebsiella pneumoniae</i> subsp. <i>pneumoniae</i> KPNIH32                           | 420    | 0.954      | 410     | P4-like           | 588185  | 599385  | 11.2 |                                                      |
|         |            | kph:KPNIH24_02795     | <i>Klebsiella pneumoniae</i>      | <i>Klebsiella pneumoniae</i> subsp. <i>pneumoniae</i> KPNIH24                           | 420    | 0.954      | 410     | P4-like           | 585958  | 597158  | 11.2 |                                                      |
|         |            | kpj:N559_4601         | <i>Klebsiella pneumoniae</i>      | <i>Klebsiella pneumoniae</i> JM45                                                       | 420    | 0.954      | 410     | P4-like           | 4681698 | 4692896 | 11.2 |                                                      |
|         |            | kpm:KPHS_05400        | <i>Klebsiella pneumoniae</i>      | <i>Klebsiella pneumoniae</i> subsp. <i>pneumoniae</i> HS11286                           | 420    | 0.954      | 410     | P4-like           | 581768  | 594033  | 12.3 |                                                      |
|         |            | kpne:KU54_023815      | <i>Klebsiella pneumoniae</i>      | <i>Klebsiella pneumoniae</i> 32192                                                      | 420    | 0.954      | 410     | P4-like           | 4703179 | 4714379 | 11.2 |                                                      |
|         |            | kpnu:L186_23655       | <i>Klebsiella pneumoniae</i>      | <i>Klebsiella pneumoniae</i> 34618                                                      | 420    | 0.954      | 410     | P4-like           | 4682111 | 4693311 | 11.2 |                                                      |
|         |            | kpq:KPR0928_02785     | <i>Klebsiella pneumoniae</i>      | <i>Klebsiella pneumoniae</i> subsp. <i>pneumoniae</i> KPR0928                           | 420    | 0.954      | 410     | P4-like           | 585959  | 597159  | 11.2 |                                                      |
|         |            | kps:KPNJ2_04869       | <i>Klebsiella pneumoniae</i>      | <i>Klebsiella pneumoniae</i> 30684/NJST258_2                                            | 420    | 0.954      | 410     | P4-like           | 4707358 | 4718557 | 11.2 |                                                      |

| P4      | Function    | Orthologs                   | Species                           | Full name                                                                  | Length | Similarity | Overlap | Element               | Start   | End     | Size | Comments                                     |
|---------|-------------|-----------------------------|-----------------------------------|----------------------------------------------------------------------------|--------|------------|---------|-----------------------|---------|---------|------|----------------------------------------------|
|         |             | kpw:KPNI<br>H30_0293<br>0   | <i>Klebsiella pneumoniae</i>      | <i>Klebsiella pneumoniae</i> subsp. <i>pneumoniae</i><br>KPNIH30           | 420    | 0.954      | 410     | P4-like               | 585959  | 597159  | 11.2 |                                              |
|         |             | kvd:KR75_<br>10995          | <i>Klebsiella varicola</i>        | <i>Klebsiella varicola</i> DX120E                                          | 420    | 0.954      | 410     | P4-like               | 4867698 | 4878882 | 11.2 |                                              |
|         |             | see:SNL<br>254_A483<br>6    | <i>Salmonella enterica</i>        | <i>Salmonella enterica</i> subsp. <i>enterica</i> serovar<br>Newport SL254 | 421    | 0.950      | 410     | P4-like               | 4709611 | 4721659 | 12   |                                              |
|         |             | ecle:ECNI<br>H2_03585       | <i>Enterobacter cloacae</i>       | <i>Enterobacter cloacae</i> ECNIH2                                         | 420    | 0.946      | 410     | Defective P4-<br>like |         |         |      | Disrupted <i>pri</i>                         |
|         |             | ehm:AB28<br>4_22310         | <i>Enterobacter hormaechei</i>    | <i>Enterobacter hormaechei</i> CAV1176                                     | 420    | 0.946      | 410     | Defective P4-<br>like |         |         |      | Disrupted <i>pri</i>                         |
|         |             | lax:APT61<br>_19835         | <i>Leclercia adecarboxylata</i>   | <i>Leclercia adecarboxylata</i> USDA-ARS-USMARC-<br>60222                  | 417    | 0.946      | 410     | Defective P4-<br>like |         |         |      | Only <i>int</i> and <i>psu</i>               |
|         |             | ecoi:ECOP<br>MV1_0473<br>9  | <i>Escherichia coli</i>           | <i>Escherichia coli</i> PMV-1                                              | 417    | 0.937      | 410     | P4-like               | 4850307 | 4861972 | 11.6 |                                              |
|         |             | serf:L085_<br>01585         | <i>Serratia</i>                   | <i>Serratia</i> sp. FS14                                                   | 425    | 0.868      | 409     | Defective P4-<br>like |         |         |      | Only <i>int</i>                              |
|         |             | ebi:EbC_3<br>9600           | <i>Erwinia billingiae</i>         | <i>Erwinia billingiae</i> Eb661                                            | 417    | 0.856      | 410     | P4-like               | 4406158 | 4418027 | 11.9 |                                              |
| 1261084 | <i>cII</i>  | vg:126108<br>4              |                                   | <i>Enterobacteria phage P4</i>                                             | 264    | 1.000      |         |                       |         |         |      |                                              |
|         |             | eih:ECOK<br>1_4789          | <i>Escherichia coli</i>           | <i>Escherichia coli</i> IHE3034                                            | 264    | 1.000      | 264     | P4-like               | 4929672 | 4941310 | 11.6 |                                              |
|         |             | raq:Rahaq<br>2_3977         | <i>Rahnella aquatilis</i>         | <i>Rahnella aquatilis</i> CIP 78.65 = ATCC 33071                           | 266    | 0.532      | 265     | Defective P4-<br>like |         |         |      | <i>ogr</i> , <i>beta</i> and <i>gop</i>      |
|         |             | bug:BC10<br>01_0005         | <i>Burkholderia</i>               | <i>Burkholderia</i> sp. CCGE1001                                           | 273    | 0.498      | 259     | Defective P4-<br>like |         |         |      | Only <i>cII</i> , <i>gop</i> and <i>beta</i> |
|         |             | rsl:RPSI07<br>_0197         | <i>Ralstonia solanacearum</i>     | <i>Ralstonia solanacearum</i> PSI07                                        | 273    | 0.372      | 269     | Defective P4-<br>like |         |         |      | Only <i>cII</i> and <i>beta</i>              |
|         |             | van:VAA_<br>00672           | <i>Vibrio anguillarum</i>         | <i>Vibrio anguillarum</i> 775                                              | 274    | 0.343      | 274     | No insert             |         |         |      |                                              |
|         |             | vpk:M636_<br>19810          | <i>Vibrio parahaemolyticus</i>    | <i>Vibrio parahaemolyticus</i> O1:K33 CDC_K4557                            | 274    | 0.343      | 274     | No insert             |         |         |      |                                              |
|         |             | lag:N175_<br>13100          | <i>Vibrio anguillarum</i>         | <i>Vibrio anguillarum</i> M3                                               | 270    | 0.344      | 270     | Defective P4-<br>like |         |         |      |                                              |
|         |             | vau:VANG<br>NB10_ci04<br>18 | <i>Vibrio anguillarum</i>         | <i>Vibrio anguillarum</i> NB10                                             | 270    | 0.344      | 270     | No insert             |         |         |      |                                              |
|         |             | del:DelCs1<br>4_4395        | <i>Delftia</i>                    | <i>Delftia</i> sp. Cs1-4                                                   | 218    | 0.363      | 190     | Defective P4-<br>like |         |         |      | Only <i>cII</i> and <i>beta</i>              |
|         |             | psy:PCNP<br>T3_00440        | <i>Psychromonas</i>               | <i>Psychromonas</i> sp. CNPT3                                              | 237    | 0.341      | 214     | No insert             |         |         |      |                                              |
| 1261083 | <i>beta</i> | vg:126108<br>3              |                                   | <i>Enterobacteria phage P4</i>                                             | 355    | 1.000      |         |                       |         |         |      |                                              |
|         |             | eih:ECOK<br>1_4790          | <i>Escherichia coli</i>           | <i>Escherichia coli</i> IHE3034                                            | 355    | 1.000      | 355     | P4-like               | 4929672 | 4941310 | 11.6 |                                              |
|         |             | raq:Rahaq<br>2_3978         | <i>Rahnella aquatilis</i>         | <i>Rahnella aquatilis</i> CIP 78.65 = ATCC 33071                           | 353    | 0.701      | 351     | Defective P4-<br>like |         |         |      | <i>ogr</i> , <i>beta</i> and <i>gop</i>      |
|         |             | bug:BC10<br>01_0007         | <i>Burkholderia</i>               | <i>Burkholderia</i> sp. CCGE1001                                           | 353    | 0.588      | 352     | Defective P4-<br>like |         |         |      | Only <i>cII</i> , <i>gop</i> and <i>beta</i> |
|         |             | mpt:Mpe_<br>A1938           | <i>Methylobium petroleiphilum</i> | <i>Methylobium petroleiphilum</i> PM1                                      | 359    | 0.438      | 356     | No insert             |         |         |      |                                              |
|         |             | del:DelCs1<br>4_4396        | <i>Delftia</i>                    | <i>Delftia</i> sp. Cs1-4                                                   | 360    | 0.429      | 361     | Defective P4-<br>like |         |         |      | Only <i>cII</i> and <i>beta</i>              |
|         |             | rsl:RPSI07<br>_0196         | <i>Ralstonia solanacearum</i>     | <i>Ralstonia solanacearum</i> PSI07                                        | 354    | 0.415      | 352     | Defective P4-<br>like |         |         |      | Only <i>cII</i> and <i>beta</i>              |
|         |             | hpas:JL26<br>_02970         | <i>Haemophilus parasuis</i>       | <i>Haemophilus parasuis</i> SH03                                           | 369    | 0.378      | 360     | P4-like?<br>Phage?    |         |         |      | Phage proteins: <i>lexA</i> ...              |
|         |             | hpaz:K756<br>_05755         | <i>Haemophilus parasuis</i>       | <i>Haemophilus parasuis</i> ZJ0906                                         | 369    | 0.378      | 360     | P4-like?<br>Phage?    |         |         |      | Phage proteins: <i>lexA</i> ...              |

| P4      | Function   | Orthologs            | Species                           | Full name                                                                         | Length | Similarity | Overlap | Element           | Start   | End     | Size | Comments                                            |
|---------|------------|----------------------|-----------------------------------|-----------------------------------------------------------------------------------|--------|------------|---------|-------------------|---------|---------|------|-----------------------------------------------------|
|         |            | gan:UMN179_02358     | <i>Gallibacterium anatis</i>      | <i>Gallibacterium anatis</i> UMN179                                               | 368    | 0.350      | 374     | Phage             |         |         |      |                                                     |
|         |            | lag:N175_13095       | <i>Vibrio anguillarum</i>         | <i>Vibrio anguillarum</i> M3                                                      | 376    | 0.306      | 369     | Defective P4-like |         |         |      |                                                     |
| 1261097 | <i>gop</i> | vg:1261097           |                                   | <i>Enterobacteria phage P4</i>                                                    | 133    | 1.000      |         |                   |         |         |      |                                                     |
|         |            | raq:Rahaq2_3979      | <i>Rahnella aquatilis</i>         | <i>Rahnella aquatilis</i> CIP 78.65 = ATCC 33071                                  | 137    | 0.481      | 133     | Defective P4-like |         |         |      | <i>ogr</i> , <i>beta</i> and <i>gop</i>             |
|         |            | bug:BC1001_0008      | <i>Burkholderia</i>               | <i>Burkholderia</i> sp. CCGE1001                                                  | 141    | 0.350      | 137     | Defective P4-like |         |         |      | Only <i>cll</i> , <i>gop</i> and <i>beta</i>        |
|         |            | cbr:CBG19597         | <i>Caenorhabditis briggsae</i>    | <i>Caenorhabditis briggsae</i> AF16                                               | 513    | 0.307      | 88      |                   |         |         |      | RefSeq (Assembly: <a href="#">GCF_000004555.1</a> ) |
|         |            | maj:MAA_08300        | <i>Metarhizium robertsii</i>      | <i>Metarhizium robertsii</i> ARSEF 23                                             | 1753   | 0.329      | 82      |                   |         |         |      | RefSeq (Assembly: <a href="#">GCF_000187425.2</a> ) |
|         |            | cac:CA_C0250         | <i>Clostridium acetobutylicum</i> | <i>Clostridium acetobutylicum</i> ATCC 824                                        | 688    | 0.353      | 68      | No insert         |         |         |      |                                                     |
|         |            | cae:SMB_G0255        | <i>Clostridium acetobutylicum</i> | <i>Clostridium acetobutylicum</i> DSM 1731                                        | 688    | 0.353      | 68      | No insert         |         |         |      |                                                     |
|         |            | cay:CEA_G0256        | <i>Clostridium acetobutylicum</i> | <i>Clostridium acetobutylicum</i> EA 2018                                         | 688    | 0.353      | 68      | No insert         |         |         |      |                                                     |
|         |            | srd:SD10_27760       | <i>Spirosoma radiotolerans</i>    | <i>Spirosoma radiotolerans</i> DG5A                                               | 494    | 0.306      | 98      | No insert         |         |         |      |                                                     |
|         |            | nsl:BOX37_10940      | <i>Nocardia soli</i>              | <i>Nocardia soli</i> Y48                                                          | 330    | 0.339      | 56      | No insert         |         |         |      |                                                     |
|         |            | sli:Slin_5408        | <i>Spirosoma linguale</i>         | <i>Spirosoma linguale</i> DSM 74                                                  | 494    | 0.060      | 98      | No insert         |         |         |      |                                                     |
| 1261094 | <i>psu</i> | vg:1261094           |                                   | <i>Enterobacteria phage P4</i>                                                    | 190    | 1.000      |         |                   |         |         |      |                                                     |
|         |            | ecoo:ECR M13514_3795 | <i>Escherichia coli</i>           | <i>Escherichia coli</i> O145:H28 RM13514                                          | 190    | 0.995      | 190     | P4-like           | 3690842 | 3702177 | 11.3 |                                                     |
|         |            | ej:ECO26_4938        | <i>Escherichia coli</i>           | <i>Escherichia coli</i> O26:H11 11368                                             | 190    | 0.995      | 190     | P4-like           | 4952573 | 4966595 | 14   |                                                     |
|         |            | sent:TY21A_13410     | <i>Salmonella enterica</i>        | <i>Salmonella enterica</i> subsp. <i>enterica</i> serovar <i>Typhi</i> Ty21a      | 190    | 0.995      | 190     | P4-like           | 2734973 | 2745406 | 10.4 |                                                     |
|         |            | stt:t2648            | <i>Salmonella enterica</i>        | <i>Salmonella enterica</i> subsp. <i>enterica</i> serovar <i>Typhi</i> Ty2        | 190    | 0.995      | 190     | P4-like           | 2734973 | 2745406 | 10.4 | Same as <i>S. enterica</i> Ty21a                    |
|         |            | ec:EcIC_1061         | <i>Escherichia coli</i>           | <i>Escherichia coli</i> ATCC 8739                                                 | 190    | 0.989      | 190     | P4-like           | 45053   | 55477   | 10.4 |                                                     |
|         |            | eih:ECOK1_4791       | <i>Escherichia coli</i>           | <i>Escherichia coli</i> IHE3034                                                   | 190    | 0.989      | 190     | P4-like           | 4929672 | 4941310 | 11.6 |                                                     |
|         |            | eal:EAKF1_ch3364     | <i>Escherichia albertii</i>       | <i>Escherichia albertii</i> KF1                                                   | 190    | 0.984      | 190     | Defective P4-like |         |         |      | Several <i>int</i>                                  |
|         |            | sbo:SBO_4171         | <i>Shigella boydii</i>            | <i>Shigella boydii</i> Sb227                                                      | 190    | 0.984      | 190     | P4-like           | 4217005 | 4228846 | 11.8 |                                                     |
|         |            | seeh:SEE H1578_04860 | <i>Salmonella enterica</i>        | <i>Salmonella enterica</i> subsp. <i>enterica</i> serovar <i>Heidelberg</i> 41578 | 190    | 0.984      | 190     | P4-like           | 885261  | 896545  | 11.3 |                                                     |
|         |            | efe:EFER_0448        | <i>Escherichia fergusonii</i>     | <i>Escherichia fergusonii</i> ATCC 35469                                          | 190    | 0.984      | 190     | P4-like           | 448071  | 459263  | 11.2 |                                                     |
|         |            | ecoi:ECOP MV1_04741  | <i>Escherichia coli</i>           | <i>Escherichia coli</i> PMV-1                                                     | 190    | 0.984      | 190     | P4-like           | 4850307 | 4861972 | 11.6 |                                                     |
|         |            | ecoh:ECR M13516_4455 | <i>Escherichia coli</i>           | <i>Escherichia coli</i> O145:H28 RM13516                                          | 190    | 0.958      | 190     | P4-like           | 4410536 | 4422590 | 12   |                                                     |
|         |            | ecm:EcSM S35_4004    | <i>Escherichia coli</i>           | <i>Escherichia coli</i> SMS-3-5                                                   | 190    | 0.953      | 190     | P4-like           | 4081414 | 4092685 | 11.3 |                                                     |
|         |            | elo:EO42_3995        | <i>Escherichia coli</i>           | <i>Escherichia coli</i> O44:H18 042                                               | 190    | 0.942      | 190     | P4-like           | 4236680 | 4247745 | 11   |                                                     |
|         |            | cmw:AFK63_19225      | <i>Cronobacter muytjensii</i>     | <i>Cronobacter muytjensii</i> ATCC 51329                                          | 188    | 0.651      | 186     | P4-like           | 4183320 | 4195597 | 12.3 |                                                     |

| P4      | Function | Orthologs            | Species                       | Full name                                                                         | Length | Similarity | Overlap | Element            | Start   | End     | Size | Comments                         |
|---------|----------|----------------------|-------------------------------|-----------------------------------------------------------------------------------|--------|------------|---------|--------------------|---------|---------|------|----------------------------------|
|         |          | enl:A3UG_00580       | <i>Enterobacter cloacae</i>   | <i>Enterobacter cloacae</i> subsp. <i>dissolvens</i> SDM                          | 187    | 0.660      | 188     | P4-like            | 104977  | 116426  | 11.5 |                                  |
|         |          | etd:ETAF_0744        | <i>Edwardsiella tarda</i>     | <i>Edwardsiella tarda</i> FL6-60                                                  | 188    | 0.638      | 188     | P4-like            | 864265  | 875965  | 11.7 |                                  |
| 1261088 | delta    | vg:1261088           |                               | <i>Enterobacteria phage P4</i>                                                    | 166    | 1.000      |         |                    |         |         |      |                                  |
|         |          | eih:ECOK_1_4792      | <i>Escherichia coli</i>       | <i>Escherichia coli</i> IHE3034                                                   | 166    | 0.982      | 166     | P4-like            | 4929672 | 4941310 | 11.6 |                                  |
|         |          | efe:EFER_0447        | <i>Escherichia fergusonii</i> | <i>Escherichia fergusonii</i> ATCC 35469                                          | 166    | 0.982      | 166     | P4-like            | 448071  | 459263  | 11.2 |                                  |
|         |          | ecoo:ECR M13514_3794 | <i>Escherichia coli</i>       | <i>Escherichia coli</i> O145:H28 RM13514                                          | 166    | 0.976      | 166     | P4-like            | 3690842 | 3702177 | 11.3 |                                  |
|         |          | ecl:EcolC_1060       | <i>Escherichia coli</i>       | <i>Escherichia coli</i> ATCC 8739                                                 | 166    | 0.976      | 166     | P4-like            | 1146254 | 1156920 | 10.7 |                                  |
|         |          | ej:ECO26_4937        | <i>Escherichia coli</i>       | <i>Escherichia coli</i> O26:H11 11368                                             | 166    | 0.976      | 166     | P4-like            | 4952573 | 4966595 | 14   |                                  |
|         |          | ecoi:ECOP MV1_04742  | <i>Escherichia coli</i>       | <i>Escherichia coli</i> PMV-1                                                     | 166    | 0.970      | 166     | P4-like            | 4850307 | 4861972 | 11.6 |                                  |
|         |          | eal:EAKF1_ch3363     | <i>Escherichia albertii</i>   | <i>Escherichia albertii</i> KF1                                                   | 55     | 0.982      | 55      | Defective P4-like  |         |         |      | Several int                      |
|         |          | seeh:SEE H1578_04865 | <i>Salmonella enterica</i>    | <i>Salmonella enterica</i> subsp. <i>enterica</i> serovar <i>Heidelberg</i> 41578 | 55     | 0.945      | 55      | P4-like            | 885261  | 896545  | 11.3 |                                  |
|         |          | sent:TY21A_13415     | <i>Salmonella enterica</i>    | <i>Salmonella enterica</i> subsp. <i>enterica</i> serovar <i>Typhi</i> Ty21a      | 55     | 0.945      | 55      | P4-like            | 2734973 | 2745406 | 10.4 |                                  |
|         |          | stt:t2649            | <i>Salmonella enterica</i>    | <i>Salmonella enterica</i> subsp. <i>enterica</i> serovar <i>Typhi</i> Ty2        | 55     | 0.945      | 55      | P4-like            | 2734973 | 2745406 | 10.4 | Same as <i>S. enterica</i> Ty21a |
|         |          | serf:L085_00060      | <i>Serratia</i>               | <i>Serratia</i> sp. <i>FS14</i>                                                   | 55     | 0.545      | 44      | Defective P4-like? |         |         |      | Only <i>delta</i> and a lysozime |
|         |          | sers:SERR SCBL_03910 | <i>Serratia</i>               | <i>Serratia</i> sp. <i>SCBI</i>                                                   | 98     | 0.545      | 44      | Defective P4-like? |         |         |      | Only <i>delta</i> and a lysozime |
|         |          | smac:SMD B11_0175    | <i>Serratia marcescens</i>    | <i>Serratia marcescens</i> subsp. <i>marcescens</i> Db11                          | 75     | 0.545      | 44      | Defective P4-like? |         |         |      | Only <i>delta</i> and a lysozime |
| 1261087 | sid      | vg:1261087           |                               | <i>Enterobacteria phage P4</i>                                                    | 244    | 1.000      |         |                    |         |         |      |                                  |
|         |          | ecoh:ECR M13516_4457 | <i>Escherichia coli</i>       | <i>Escherichia coli</i> O145:H28 RM13516                                          | 244    | 0.992      | 244     | P4-like            | 4410536 | 4422590 | 12   |                                  |
|         |          | elo:EC042_3996       | <i>Escherichia coli</i>       | <i>Escherichia coli</i> O44:H18 O42                                               | 244    | 0.996      | 244     | P4-like            | 4236680 | 4247745 | 11   |                                  |
|         |          | sbo:SBO_4170         | <i>Shigella boydii</i>        | <i>Shigella boydii</i> Sb227                                                      | 244    | 0.996      | 244     | P4-like            | 4217005 | 4228846 | 11.8 |                                  |
|         |          | ecl:EcolC_0049       | <i>Escherichia coli</i>       | <i>Escherichia coli</i> ATCC 8739                                                 | 244    | 0.988      | 244     | P4-like            | 45053   | 55477   | 10.4 |                                  |
|         |          | ecoi:ECOP MV1_04743  | <i>Escherichia coli</i>       | <i>Escherichia coli</i> PMV-1                                                     | 244    | 0.992      | 244     | P4-like            | 4850307 | 4861972 | 11.6 |                                  |
|         |          | efe:EFER_0446        | <i>Escherichia fergusonii</i> | <i>Escherichia fergusonii</i> ATCC 35469                                          | 266    | 0.992      | 244     | P4-like            | 448071  | 459263  | 11.2 |                                  |
|         |          | ecoo:ECR M13514_3793 | <i>Escherichia coli</i>       | <i>Escherichia coli</i> O145:H28 RM13514                                          | 244    | 0.988      | 244     | P4-like            | 3690842 | 3702177 | 11.3 |                                  |
|         |          | eih:ECOK_1_4793      | <i>Escherichia coli</i>       | <i>Escherichia coli</i> IHE3034                                                   | 244    | 0.980      | 244     | P4-like            | 4929672 | 4941310 | 11.6 |                                  |
|         |          | ecm:EcSM S35_4005    | <i>Escherichia coli</i>       | <i>Escherichia coli</i> SMS-3-5                                                   | 244    | 0.980      | 244     | P4-like            | 4081414 | 4092685 | 11.3 |                                  |
|         |          | ej:ECO26_4936        | <i>Escherichia coli</i>       | <i>Escherichia coli</i> O26:H11 11368                                             | 244    | 0.984      | 244     | P4-like            | 4952573 | 4966595 | 14   |                                  |

| P4      | Function | Orthologs                      | Species                       | Full name                                                                      | Length | Similarity | Overlap | Element | Start   | End     | Size | Comments                         |
|---------|----------|--------------------------------|-------------------------------|--------------------------------------------------------------------------------|--------|------------|---------|---------|---------|---------|------|----------------------------------|
|         |          | sent:TY21<br>A_13420           | <i>Salmonella enterica</i>    | <i>Salmonella enterica</i> subsp. <i>enterica</i> serovar Typhi Ty21a          | 244    | 0.980      | 244     | P4-like | 2734973 | 2745406 | 10.4 |                                  |
|         |          | stt:t2650                      | <i>Salmonella enterica</i>    | <i>Salmonella enterica</i> subsp. <i>enterica</i> serovar Typhi Ty2            | 244    | 0.980      | 244     | P4-like | 2734973 | 2745406 | 10.4 | Same as <i>S. enterica</i> Ty21a |
|         |          | seeh:SEE<br>H1578_04<br>870    | <i>Salmonella enterica</i>    | <i>Salmonella enterica</i> subsp. <i>enterica</i> serovar Heidelberg 41578     | 244    | 0.980      | 244     | P4-like | 885261  | 896545  | 11.3 |                                  |
|         |          | seeb:SEE<br>B0189_01<br>9925   | <i>Salmonella enterica</i>    | <i>Salmonella enterica</i> subsp. <i>enterica</i> serovar Bareilly CFSAN000189 | 244    | 0.657      | 239     | P4-like | 4089428 | 4101526 | 12   |                                  |
|         |          | senj:CFSA<br>N001992_<br>19715 | <i>Salmonella enterica</i>    | <i>Salmonella enterica</i> subsp. <i>enterica</i> serovar Javiana CFSAN001992  | 245    | 0.653      | 239     | P4-like | 4078550 | 4089203 | 10.6 |                                  |
| 1261090 | alpA     | vg:126109<br>0                 |                               | <i>Enterobacteria phage P4</i>                                                 | 88     | 1.000      |         |         |         |         |      |                                  |
|         |          | ec:EcIC_1058                   | <i>Escherichia coli</i>       | <i>Escherichia coli</i> ATCC 8739                                              | 88     | 0.989      | 88      | P4-like | 1146254 | 1156920 | 10.7 |                                  |
|         |          | ecm:EcSM<br>S35_4006           | <i>Escherichia coli</i>       | <i>Escherichia coli</i> SMS-3-5                                                | 88     | 0.989      | 88      | P4-like | 4081414 | 4092685 | 11.3 |                                  |
|         |          | ecoh:ECR<br>M13516_4<br>459    | <i>Escherichia coli</i>       | <i>Escherichia coli</i> O145:H28 RM13516                                       | 88     | 0.989      | 88      | P4-like | 4410536 | 4422590 | 12   |                                  |
|         |          | ecoi:ECOP<br>MV1_0474<br>4     | <i>Escherichia coli</i>       | <i>Escherichia coli</i> PMV-1                                                  | 88     | 0.989      | 88      | P4-like | 4850307 | 4861972 | 11.6 |                                  |
|         |          | ecoo:ECR<br>M13514_3<br>792    | <i>Escherichia coli</i>       | <i>Escherichia coli</i> O145:H28 RM13514                                       | 88     | 0.989      | 88      | P4-like | 3690842 | 3702177 | 11.3 |                                  |
|         |          | efe:EFER_0445                  | <i>Escherichia fergusonii</i> | <i>Escherichia fergusonii</i> ATCC 35469                                       | 88     | 0.989      | 88      | P4-like | 448071  | 459263  | 11.2 |                                  |
|         |          | eih:ECOK<br>1_4794             | <i>Escherichia coli</i>       | <i>Escherichia coli</i> IHE3034                                                | 88     | 0.989      | 88      | P4-like | 4929672 | 4941310 | 11.6 |                                  |
|         |          | elo:EC042_3997                 | <i>Escherichia coli</i>       | <i>Escherichia coli</i> O44:H18 O42                                            | 88     | 0.989      | 88      | P4-like | 4236680 | 4247745 | 11   |                                  |
|         |          | ej:ECO26_4934                  | <i>Escherichia coli</i>       | <i>Escherichia coli</i> O26:H11 11368                                          | 88     | 0.989      | 88      | P4-like | 4952573 | 4966595 | 14   |                                  |
|         |          | sbo:SBO_4169                   | <i>Shigella boydii</i>        | <i>Shigella boydii</i> Sb227                                                   | 88     | 0.989      | 88      | P4-like | 4217005 | 4228846 | 11.8 |                                  |
|         |          | seeh:SEE<br>H1578_04<br>875    | <i>Salmonella enterica</i>    | <i>Salmonella enterica</i> subsp. <i>enterica</i> serovar Heidelberg 41578     | 88     | 0.989      | 88      | P4-like | 885261  | 896545  | 11.3 |                                  |
|         |          | sent:TY21<br>A_13425           | <i>Salmonella enterica</i>    | <i>Salmonella enterica</i> subsp. <i>enterica</i> serovar Typhi Ty21a          | 88     | 0.977      | 88      | P4-like | 2734973 | 2745406 | 10.4 |                                  |
|         |          | stt:t2651                      | <i>Salmonella enterica</i>    | <i>Salmonella enterica</i> subsp. <i>enterica</i> serovar Typhi Ty2            | 72     | 0.972      | 72      | P4-like | 2734973 | 2745406 | 10.4 | Same as <i>S. enterica</i> Ty21a |
|         |          | csi:P262_0<br>5045             | <i>Cronobacter sakazakii</i>  | <i>Cronobacter sakazakii</i> CMCC 45402                                        | 88     | 0.750      | 88      | P4-like | 3760642 | 3771860 | 11.2 |                                  |
|         |          | kpv:KPNIH<br>29_25720          | <i>Klebsiella pneumoniae</i>  | <i>Klebsiella pneumoniae</i> subsp. <i>pneumoniae</i> KPNIH29                  | 88     | 0.716      | 88      | P4-like | 5163114 | 5174288 | 11.2 |                                  |
| 1261091 | cl       | vg:126109<br>1                 |                               | <i>Enterobacteria phage P4</i>                                                 | 138    | 1.000      |         |         |         |         |      |                                  |
|         |          | ej:ECO26_4933                  | <i>Escherichia coli</i>       | <i>Escherichia coli</i> O26:H11 11368                                          | 199    | 0.993      | 138     | P4-like | 4952573 | 4966595 | 14   |                                  |
|         |          | sbo:SBO_4168                   | <i>Shigella boydii</i>        | <i>Shigella boydii</i> Sb227                                                   | 199    | 0.993      | 138     | P4-like | 4217005 | 4228846 | 11.8 |                                  |
|         |          | eih:ECOK<br>1_4795             | <i>Escherichia coli</i>       | <i>Escherichia coli</i> IHE3034                                                | 199    | 0.971      | 138     | P4-like | 4929672 | 4941310 | 11.6 |                                  |
|         |          | ecoh:ECR<br>M13516_4<br>460    | <i>Escherichia coli</i>       | <i>Escherichia coli</i> O145:H28 RM13516                                       | 199    | 0.935      | 138     | P4-like | 4410536 | 4422590 | 12   |                                  |
|         |          | efe:EFER_0444                  | <i>Escherichia fergusonii</i> | <i>Escherichia fergusonii</i> ATCC 35469                                       | 137    | 0.927      | 137     | P4-like | 448071  | 459263  | 11.2 |                                  |

| P4      | Function | Orthologs                   | Species                        | Full name                                                                            | Length | Similarity | Overlap | Element           | Start   | End     | Size | Comments                         |
|---------|----------|-----------------------------|--------------------------------|--------------------------------------------------------------------------------------|--------|------------|---------|-------------------|---------|---------|------|----------------------------------|
|         |          | ecoo:ECR<br>M13514_4<br>676 | <i>Escherichia coli</i>        | <i>Escherichia coli</i> O145:H28 RM13514                                             | 199    | 0.906      | 138     | P4-like           | 4558846 | 4569909 | 11   |                                  |
|         |          | ecI:EcolC_<br>0047          | <i>Escherichia coli</i>        | <i>Escherichia coli</i> ATCC 8739                                                    | 196    | 0.848      | 138     | P4-like           | 45053   | 55477   | 10.4 |                                  |
|         |          | seeh:SEE<br>H1578_04<br>880 | <i>Salmonella enterica</i>     | <i>Salmonella enterica</i> subsp. <i>enterica</i> serovar<br><i>Heidelberg</i> 41578 | 196    | 0.848      | 138     | P4-like           | 885261  | 896545  | 11.3 |                                  |
|         |          | sent:TY21<br>A_13430        | <i>Salmonella enterica</i>     | <i>Salmonella enterica</i> subsp. <i>enterica</i> serovar<br><i>Typhi</i> Ty21a      | 196    | 0.848      | 138     | P4-like           | 2734973 | 2745406 | 10.4 |                                  |
|         |          | ecm:EcSM<br>S35_4007        | <i>Escherichia coli</i>        | <i>Escherichia coli</i> SMS-3-5                                                      | 134    | 0.854      | 137     | P4-like           | 4081414 | 4092685 | 11.3 |                                  |
|         |          | stt:t2652                   | <i>Salmonella enterica</i>     | <i>Salmonella enterica</i> subsp. <i>enterica</i> serovar<br><i>Typhi</i> Ty2        | 134    | 0.854      | 137     | P4-like           | 2734973 | 2745406 | 10.4 | Same as <i>S. enterica</i> Ty21a |
|         |          | elo:EC042<br>_3998          | <i>Escherichia coli</i>        | <i>Escherichia coli</i> O44:H18 O42                                                  | 134    | 0.825      | 137     | P4-like           | 4236680 | 4247745 | 11   |                                  |
|         |          | ses:SARI_<br>03878          | <i>Salmonella enterica</i>     | <i>Salmonella enterica</i> subsp. <i>arizonae</i> serovar<br>62:z4,z23:- RSK2980     | 200    | 0.717      | 138     | P4-like           | 3804516 | 3815458 | 10.9 |                                  |
|         |          | kok:KONI<br>H1_28730        | <i>Klebsiella oxytoca</i>      | <i>Klebsiella oxytoca</i> KONIH1                                                     | 183    | 0.704      | 115     | P4-like           | 5994027 | 6004738 | 10.7 |                                  |
| 1261085 | epsilon  | vg:126108<br>5              |                                | <i>Enterobacteria phage P4</i>                                                       | 95     | 1.000      |         |                   |         |         |      |                                  |
|         |          | ecm:EcSM<br>S35_4008        | <i>Escherichia coli</i>        | <i>Escherichia coli</i> SMS-3-5                                                      | 95     | 0.989      | 95      | P4-like           | 4081414 | 4092685 | 11.3 |                                  |
|         |          | ecoh:ECR<br>M13516_4<br>461 | <i>Escherichia coli</i>        | <i>Escherichia coli</i> O145:H28 RM13516                                             | 95     | 0.989      | 95      | P4-like           | 4410536 | 4422590 | 12   |                                  |
|         |          | ecoi:ECOP<br>MV1_0474<br>8  | <i>Escherichia coli</i>        | <i>Escherichia coli</i> PMV-1                                                        | 95     | 0.989      | 95      | P4-like           | 4850307 | 4861972 | 11.6 |                                  |
|         |          | ecoo:ECR<br>M13514_3<br>790 | <i>Escherichia coli</i>        | <i>Escherichia coli</i> O145:H28 RM13514                                             | 95     | 0.989      | 95      | P4-like           | 3690842 | 3702177 | 11.3 |                                  |
|         |          | efe:EFER_<br>0443           | <i>Escherichia fergusonii</i>  | <i>Escherichia fergusonii</i> ATCC 35469                                             | 95     | 0.989      | 95      | P4-like           | 448071  | 459263  | 11.2 |                                  |
|         |          | eih:ECOK<br>1_4796          | <i>Escherichia coli</i>        | <i>Escherichia coli</i> IHE3034                                                      | 95     | 0.989      | 95      | P4-like           | 4929672 | 4941310 | 11.6 |                                  |
|         |          | elo:EC042<br>_3999          | <i>Escherichia coli</i>        | <i>Escherichia coli</i> O44:H18 O42                                                  | 95     | 0.989      | 95      | P4-like           | 4236680 | 4247745 | 11   |                                  |
|         |          | eoJ:ECO26<br>_4932          | <i>Escherichia coli</i>        | <i>Escherichia coli</i> O26:H11 11368                                                | 95     | 0.989      | 95      | P4-like           | 4952573 | 4966595 | 14   |                                  |
|         |          | seeh:SEE<br>H1578_04<br>885 | <i>Salmonella enterica</i>     | <i>Salmonella enterica</i> subsp. <i>enterica</i> serovar<br><i>Heidelberg</i> 41578 | 95     | 0.989      | 95      | P4-like           | 885261  | 896545  | 11.3 |                                  |
|         |          | sent:TY21<br>A_13435        | <i>Salmonella enterica</i>     | <i>Salmonella enterica</i> subsp. <i>enterica</i> serovar<br><i>Typhi</i> Ty21a      | 95     | 0.989      | 95      | P4-like           | 2734973 | 2745406 | 10.4 |                                  |
|         |          | stt:t2653                   | <i>Salmonella enterica</i>     | <i>Salmonella enterica</i> subsp. <i>enterica</i> serovar<br><i>Typhi</i> Ty2        | 95     | 0.989      | 95      | P4-like           | 2734973 | 2745406 | 10.4 | Same as <i>S. enterica</i> Ty21a |
|         |          | ecI:EcolC_<br>0046          | <i>Escherichia coli</i>        | <i>Escherichia coli</i> ATCC 8739                                                    | 95     | 0.979      | 95      | P4-like           | 45053   | 55477   | 10.4 |                                  |
|         |          | ecl:ECNI<br>H2_03625        | <i>Enterobacter cloacae</i>    | <i>Enterobacter cloacae</i> ECNIH2                                                   | 99     | 0.687      | 99      | Defective P4-like |         |         |      | Disrupted <i>pri</i>             |
|         |          | ehm:AB28<br>4_22265         | <i>Enterobacter hormaechei</i> | <i>Enterobacter hormaechei</i> CAV1176                                               | 99     | 0.687      | 99      | Defective P4-like |         |         |      | Disrupted <i>pri</i>             |
| 1261086 | ORF151   | vg:126108<br>6              |                                | <i>Enterobacteria phage P4</i>                                                       | 151    | 1.000      |         |                   |         |         |      |                                  |
|         |          | seeh:SEE<br>H1578_04<br>890 | <i>Salmonella enterica</i>     | <i>Salmonella enterica</i> subsp. <i>enterica</i> serovar<br><i>Heidelberg</i> 41578 | 151    | 1.000      | 151     | P4-like           | 885261  | 896545  | 11.3 |                                  |
|         |          | sent:TY21<br>A_13440        | <i>Salmonella enterica</i>     | <i>Salmonella enterica</i> subsp. <i>enterica</i> serovar<br><i>Typhi</i> Ty21a      | 151    | 1.000      | 151     | P4-like           | 2734973 | 2745406 | 10.4 |                                  |

| P4      | Function | Orthologs            | Species                               | Full name                                                                     | Length | Similarity | Overlap | Element           | Start   | End     | Size | Comments                         |
|---------|----------|----------------------|---------------------------------------|-------------------------------------------------------------------------------|--------|------------|---------|-------------------|---------|---------|------|----------------------------------|
|         |          | stt:t2654            | <i>Salmonella enterica</i>            | <i>Salmonella enterica</i> subsp. <i>enterica</i> serovar Typhi Ty2           | 151    | 1.000      | 151     | P4-like           | 2734973 | 2745406 | 10.4 | Same as <i>S. enterica</i> Ty21a |
|         |          | ecl:EcolC_0045       | <i>Escherichia coli</i>               | <i>Escherichia coli</i> ATCC 8739                                             | 151    | 0.993      | 151     | P4-like           | 45053   | 55477   | 10.4 |                                  |
|         |          | ecoo:ECR M13514_3789 | <i>Escherichia coli</i>               | <i>Escherichia coli</i> O145:H28 RM13514                                      | 151    | 0.993      | 151     | P4-like           | 3690842 | 3702177 | 11.3 |                                  |
|         |          | sbo:SBO_4167         | <i>Shigella boydii</i>                | <i>Shigella boydii</i> Sb227                                                  | 151    | 0.993      | 151     | P4-like           | 4217005 | 4228846 | 11.8 |                                  |
|         |          | eih:ECOK_1_4797      | <i>Escherichia coli</i>               | <i>Escherichia coli</i> IHE3034                                               | 151    | 0.987      | 151     | P4-like           | 4929672 | 4941310 | 11.6 |                                  |
|         |          | ecoi:ECOP MV1_04749  | <i>Escherichia coli</i>               | <i>Escherichia coli</i> PMV-1                                                 | 151    | 0.987      | 151     | P4-like           | 4850307 | 4861972 | 11.6 |                                  |
|         |          | efe:EFER_0442        | <i>Escherichia fergusonii</i>         | <i>Escherichia fergusonii</i> ATCC 35469                                      | 151    | 0.987      | 151     | P4-like           | 448071  | 459263  | 11.2 |                                  |
|         |          | ecm:EcSM S35_4009    | <i>Escherichia coli</i>               | <i>Escherichia coli</i> SMS-3-5                                               | 151    | 0.987      | 151     | P4-like           | 4081414 | 4092685 | 11.3 |                                  |
|         |          | ecoh:ECR M13516_4462 | <i>Escherichia coli</i>               | <i>Escherichia coli</i> O145:H28 RM13516                                      | 151    | 0.980      | 151     | P4-like           | 4410536 | 4422590 | 12   |                                  |
|         |          | ej:ECO26_4931        | <i>Escherichia coli</i>               | <i>Escherichia coli</i> O26:H11 11368                                         | 151    | 0.974      | 151     | P4-like           | 4952573 | 4966595 | 14   |                                  |
|         |          | elo:EC042_4000       | <i>Escherichia coli</i>               | <i>Escherichia coli</i> O44:H18 042                                           | 151    | 0.974      | 151     | P4-like           | 4236680 | 4247745 | 11   |                                  |
|         |          | ses:SARI_03876       | <i>Salmonella enterica</i>            | <i>Salmonella enterica</i> subsp. <i>arizonae</i> serovar 62:z4,z23:- RSK2980 | 149    | 0.702      | 151     | P4-like           | 3804516 | 3815458 | 10.9 |                                  |
|         |          | ecl:ECNI H2_03630    | <i>Enterobacter cloacae</i>           | <i>Enterobacter cloacae</i> ECNIH2                                            | 149    | 0.675      | 151     | Defective P4-like |         |         |      | Disrupted <i>pri</i>             |
|         |          | ehm:AB28_4_22260     | <i>Enterobacter hormaechei</i>        | <i>Enterobacter hormaechei</i> CAV1176                                        | 149    | 0.675      | 151     | Defective P4-like |         |         |      | Disrupted <i>pri</i>             |
|         |          | dat:HRM2_26500       | <i>Desulfobacterium autotrophicum</i> | <i>Desulfobacterium autotrophicum</i> HRM2                                    | 1206   | 0.355      | 107     | No insert         |         |         |      |                                  |
| 1261093 | ORF106   | vg:1261093           |                                       | <i>Enterobacteria phage P4</i>                                                | 106    | 1.000      |         |                   |         |         |      |                                  |
|         |          | ecl:EcolC_0044       | <i>Escherichia coli</i>               | <i>Escherichia coli</i> ATCC 8739                                             | 106    | 1.000      | 106     | P4-like           | 45053   | 55477   | 10.4 |                                  |
|         |          | ecm:EcSM S35_4010    | <i>Escherichia coli</i>               | <i>Escherichia coli</i> SMS-3-5                                               | 106    | 1.000      | 106     | P4-like           | 4081414 | 4092685 | 11.3 |                                  |
|         |          | ecoh:ECR M13516_4463 | <i>Escherichia coli</i>               | <i>Escherichia coli</i> O145:H28 RM13516                                      | 106    | 1.000      | 106     | P4-like           | 4410536 | 4422590 | 12   |                                  |
|         |          | ecoi:ECOP MV1_04750  | <i>Escherichia coli</i>               | <i>Escherichia coli</i> PMV-1                                                 | 106    | 1.000      | 106     | P4-like           | 4850307 | 4861972 | 11.6 |                                  |
|         |          | ecoo:ECR M13514_3788 | <i>Escherichia coli</i>               | <i>Escherichia coli</i> O145:H28 RM13514                                      | 106    | 1.000      | 106     | P4-like           | 3690842 | 3702177 | 11.3 |                                  |
|         |          | eih:ECOK_1_4798      | <i>Escherichia coli</i>               | <i>Escherichia coli</i> IHE3034                                               | 106    | 1.000      | 106     | P4-like           | 4929672 | 4941310 | 11.6 |                                  |
|         |          | elo:EC042_4001       | <i>Escherichia coli</i>               | <i>Escherichia coli</i> O44:H18 042                                           | 106    | 1.000      | 106     | P4-like           | 4236680 | 4247745 | 11   |                                  |
|         |          | ej:ECO26_4927        | <i>Escherichia coli</i>               | <i>Escherichia coli</i> O26:H11 11368                                         | 106    | 1.000      | 106     | P4-like           | 4952573 | 4966595 | 14   |                                  |
|         |          | sbo:SBO_4166         | <i>Shigella boydii</i>                | <i>Shigella boydii</i> Sb227                                                  | 106    | 1.000      | 106     | P4-like           | 4217005 | 4228846 | 11.8 |                                  |
|         |          | seeh:SEE H1578_04895 | <i>Salmonella enterica</i>            | <i>Salmonella enterica</i> subsp. <i>enterica</i> serovar Heidelberg 41578    | 106    | 1.000      | 106     | P4-like           | 885261  | 896545  | 11.3 |                                  |
|         |          | sent:TY21A_13445     | <i>Salmonella enterica</i>            | <i>Salmonella enterica</i> subsp. <i>enterica</i> serovar Typhi Ty21a         | 106    | 1.000      | 106     | P4-like           | 2734973 | 2745406 | 10.4 |                                  |
|         |          | stt:t2655            | <i>Salmonella enterica</i>            | <i>Salmonella enterica</i> subsp. <i>enterica</i> serovar Typhi Ty2           | 106    | 1.000      | 106     | P4-like           | 2734973 | 2745406 | 10.4 | Same as <i>S. enterica</i> Ty21a |



| P4      | Function         | Orthologs               | Species                           | Full name                                                                              | Length | Similarity | Overlap | Element           | Start   | End     | Size | Comments                             |
|---------|------------------|-------------------------|-----------------------------------|----------------------------------------------------------------------------------------|--------|------------|---------|-------------------|---------|---------|------|--------------------------------------|
|         |                  | efe:EFER_0441           | <i>Escherichia fergusonii</i>     | <i>Escherichia fergusonii</i> ATCC 35469                                               | 106    | 0.991      | 106     | P4-like           | 448071  | 459263  | 11.2 |                                      |
|         |                  | senj:CFSA N001992_19695 | <i>Salmonella enterica</i>        | <i>Salmonella enterica</i> subsp. <i>enterica</i> serovar <i>Javiana</i> CFSAN001992   | 106    | 0.925      | 106     | P4-like           | 4078550 | 4089203 | 10.6 |                                      |
|         |                  | ses:SARI_03874          | <i>Salmonella enterica</i>        | <i>Salmonella enterica</i> subsp. <i>arizonae</i> serovar 62:z4,z23:- RSK2980          | 106    | 0.925      | 106     | P4-like           | 3804516 | 3815458 | 10.9 |                                      |
|         |                  | seb:STM474_2872         | <i>Salmonella enterica</i>        | <i>Salmonella enterica</i> subsp. <i>enterica</i> serovar <i>Typhimurium</i> ST4/74    | 106    | 0.915      | 106     | P4-like           | 2890042 | 2900481 | 10.4 |                                      |
|         |                  | sef:UMN798_2969         | <i>Salmonella enterica</i>        | <i>Salmonella enterica</i> subsp. <i>enterica</i> serovar <i>Typhimurium</i> 798       | 106    | 0.915      | 106     | P4-like           | 2888784 | 2899223 | 10.4 | Same as <i>S. typhimurium</i> ST4/74 |
|         |                  | sey:SL1344_2721         | <i>Salmonella enterica</i>        | <i>Salmonella enterica</i> subsp. <i>enterica</i> serovar <i>Typhimurium</i> SL1344    | 106    | 0.915      | 106     | P4-like           | 2890042 | 2900481 | 10.4 | Same as <i>S. typhimurium</i> ST4/74 |
|         |                  | sty:STY4831             | <i>Salmonella enterica</i>        | <i>Salmonella enterica</i> subsp. <i>enterica</i> serovar <i>Typhi</i> CT18            | 106    | 0.915      | 106     | P4-like           | 4683670 | 4695086 | 11.4 |                                      |
|         |                  | ron:TE10_01825          | <i>Raoultella ornithinolytica</i> | <i>Raoultella ornithinolytica</i> S12                                                  | 106    | 0.915      | 106     | P4-like           | 377086  | 387244  | 10.2 |                                      |
|         |                  | seeb:SEE B0189_019905   | <i>Salmonella enterica</i>        | <i>Salmonella enterica</i> subsp. <i>enterica</i> serovar <i>Bareilly</i> CFSAN00189   | 106    | 0.915      | 106     | P4-like           | 4089428 | 4101526 | 12   |                                      |
|         |                  | sek:SSPA3992            | <i>Salmonella enterica</i>        | <i>Salmonella enterica</i> subsp. <i>enterica</i> serovar <i>Paratyphi A</i> AKU12601  | 106    | 0.906      | 106     | P4-like           | 4456338 | 4466061 | 9.7  |                                      |
|         |                  | senb:BN855_28010        | <i>Salmonella enterica</i>        | <i>Salmonella enterica</i> subsp. <i>enterica</i> serovar <i>Bovismorbificans</i> 3114 | 106    | 0.915      | 106     | P4-like           | 2783062 | 2792517 | 9.5  |                                      |
|         |                  | spq:SPAB_03425          | <i>Salmonella enterica</i>        | <i>Salmonella enterica</i> subsp. <i>enterica</i> serovar <i>Paratyphi B</i>           | 106    | 0.915      | 106     | Defective P4-like |         |         |      | No int                               |
|         |                  | spt:SPA4298             | <i>Salmonella enterica</i>        | <i>Salmonella enterica</i> subsp. <i>enterica</i> serovar <i>Paratyphi A</i> ATCC9150  | 106    | 0.906      | 106     | Defective P4-like |         |         |      | No int                               |
|         |                  | etd:ETAF_0749           | <i>Edwardsiella tarda</i>         | <i>Edwardsiella tarda</i> FL6-60                                                       | 106    | 0.906      | 106     | P4-like           | 864265  | 875965  | 11.7 |                                      |
|         |                  | ecl:ECNI H2_03640       | <i>Enterobacter cloacae</i>       | <i>Enterobacter cloacae</i> ECNIH2                                                     | 106    | 0.887      | 106     | Defective P4-like |         |         |      | Disrupted <i>pri</i>                 |
|         |                  | ehm:AB284_22250         | <i>Enterobacter cloacae</i>       | <i>Enterobacter hormaechei</i> CAV1176                                                 | 106    | 0.887      | 106     | Defective P4-like |         |         |      | Disrupted <i>pri</i>                 |
| 1261095 | <i>pri/alpha</i> | vg:1261095              |                                   | <i>Enterobacteria phage P4</i>                                                         | 777    | 1.000      |         |                   |         |         |      |                                      |
|         |                  | efe:EFER_0440           | <i>Escherichia fergusonii</i>     | <i>Escherichia fergusonii</i> ATCC 35469                                               | 777    | 0.994      | 777     | P4-like           | 448071  | 459263  | 11.2 |                                      |
|         |                  | ecm:EcSM S35_4012       | <i>Escherichia coli</i>           | <i>Escherichia coli</i> SMS-3-5                                                        | 777    | 0.994      | 777     | P4-like           | 4081414 | 4092685 | 11.3 |                                      |
|         |                  | elo:EC042_4002          | <i>Escherichia coli</i>           | <i>Escherichia coli</i> O44:H18 O42                                                    | 777    | 0.995      | 776     | P4-like           | 4236680 | 4247745 | 11   |                                      |
|         |                  | ecl:EcolC_0043          | <i>Escherichia coli</i>           | <i>Escherichia coli</i> ATCC 8739                                                      | 777    | 0.992      | 777     | P4-like           | 45053   | 55477   | 10.4 |                                      |
|         |                  | ej:ECO26_4926           | <i>Escherichia coli</i>           | <i>Escherichia coli</i> O26:H11 11368                                                  | 777    | 0.992      | 776     | P4-like           | 4952573 | 4966595 | 14   |                                      |
|         |                  | ecoo:ECR M13514_3787    | <i>Escherichia coli</i>           | <i>Escherichia coli</i> O145:H28 RM13514                                               | 777    | 0.992      | 777     | P4-like           | 3690842 | 3702177 | 11.3 |                                      |
|         |                  | sent:TY21 A_13450       | <i>Salmonella enterica</i>        | <i>Salmonella enterica</i> subsp. <i>enterica</i> serovar <i>Typhi</i> Ty21a           | 777    | 0.991      | 776     | P4-like           | 2734973 | 2745406 | 10.4 |                                      |
|         |                  | stt:t2656               | <i>Salmonella enterica</i>        | <i>Salmonella enterica</i> subsp. <i>enterica</i> serovar <i>Typhi</i> Ty2             | 777    | 0.991      | 776     | P4-like           | 2734973 | 2745406 | 10.4 |                                      |
|         |                  | eih:ECOK1_4799          | <i>Escherichia coli</i>           | <i>Escherichia coli</i> IHE3034                                                        | 777    | 0.991      | 776     | P4-like           | 4929672 | 4941310 | 11.6 |                                      |
|         |                  | ecoi:ECOP MV1_04751     | <i>Escherichia coli</i>           | <i>Escherichia coli</i> PMV-1                                                          | 777    | 0.991      | 776     | P4-like           | 4850307 | 4861972 | 11.6 |                                      |
|         |                  | seeh:SEE H1578_04900    | <i>Salmonella enterica</i>        | <i>Salmonella enterica</i> subsp. <i>enterica</i> serovar <i>Heidelberg</i> 41578      | 777    | 0.990      | 776     | P4-like           | 885261  | 896545  | 11.3 |                                      |
|         |                  | sbo:SBO_4165            | <i>Shigella boydii</i>            | <i>Shigella boydii</i> Sb227                                                           | 777    | 0.988      | 776     | P4-like           | 4217005 | 4228846 | 11.8 |                                      |

| P4      | Function | Orthologs                   | Species                            | Full name                                                            | Length | Similarity | Overlap | Element           | Start   | End     | Size | Comments           |
|---------|----------|-----------------------------|------------------------------------|----------------------------------------------------------------------|--------|------------|---------|-------------------|---------|---------|------|--------------------|
|         |          | ecoh:ECR<br>M13516_4<br>464 | <i>Escherichia coli</i>            | <i>Escherichia coli</i> O145:H28 RM13516                             | 777    | 0.988      | 777     | P4-like           | 4410536 | 4422590 | 12   |                    |
|         |          | sty:STY48<br>32             | <i>Salmonella enterica</i>         | <i>Salmonella enterica</i> subsp. <i>enterica</i> serovar Typhi CT18 | 777    | 0.862      | 774     | P4-like           | 4683670 | 4695086 | 11.4 |                    |
|         |          | ecln:ECNI<br>H4_05540       | <i>Enterobacter cloacae</i>        | <i>Enterobacter cloacae</i> ECNIH4                                   | 777    | 0.846      | 774     | P4-like           | 1150352 | 1161464 | 11.1 |                    |
|         |          | eni:A3UG_00545              | <i>Enterobacter cloacae</i>        | <i>Enterobacter cloacae</i> subsp. <i>dissolvens</i> SDM             | 777    | 0.845      | 774     | P4-like           | 104980  | 116427  | 11.5 |                    |
|         |          | ebt:EBL_c<br>09330          | <i>Shimwellia blattae</i>          | <i>Shimwellia blattae</i> DSM 4481 = NBRC 105725                     | 777    | 0.848      | 774     | P4-like           | 944228  | 954134  | 9.9  |                    |
|         |          | etd:ETAF_0750               | <i>Edwardsiella tarda</i>          | <i>Edwardsiella tarda</i> FL6-60                                     | 777    | 0.850      | 774     | P4-like           | 864265  | 875965  | 11.7 |                    |
| 1261089 |          | vg:126108<br>9              |                                    | <i>Enterobacteria phage P4</i>                                       | 111    | 1.000      |         |                   |         |         |      |                    |
|         |          | ecoi:ECOP<br>MV1_0475<br>2  | <i>Escherichia coli</i>            | <i>Escherichia coli</i> PMV-1                                        | 111    | 0.928      | 111     | P4-like           | 4850307 | 4861972 | 11.6 |                    |
|         |          | eih:ECOK<br>1_4800          | <i>Escherichia coli</i>            | <i>Escherichia coli</i> IHE3034                                      | 78     | 0.974      | 77      | P4-like           | 4929672 | 4941310 | 11.6 |                    |
|         |          | efe:EFER_0439               | <i>Escherichia fergusonii</i>      | <i>Escherichia fergusonii</i> ATCC 35469                             | 72     | 0.915      | 47      | P4-like           | 448071  | 459263  | 11.2 |                    |
|         |          | ecoo:ECR<br>M13514_4<br>682 | <i>Escherichia coli</i>            | <i>Escherichia coli</i> O145:H28 RM13514                             | 48     | 0.915      | 47      | P4-like           | 4558846 | 4569909 | 11   |                    |
|         |          | eal:EAKF1<br>_ch3360c       | <i>Escherichia albertii</i>        | <i>Escherichia albertii</i> KF1                                      | 38     | 0.882      | 34      | Defective P4-like |         |         |      | Several <i>int</i> |
|         |          | stt:t4530                   | <i>Salmonella enterica</i>         | <i>Salmonella enterica</i> subsp. <i>enterica</i> serovar Typhi Ty2  | 46     | 0.605      | 38      | P4-like           | 4666559 | 4677974 | 11.4 |                    |
|         |          | ete:ETEE_0923               | <i>Edwardsiella anguillarum</i>    | <i>Edwardsiella anguillarum</i> ET080813                             | 70     | 0.526      | 38      | P4-like           | 864925  | 874993  | 10   |                    |
|         |          | enc:ECL_0<br>0700           | <i>Enterobacter cloacae</i>        | <i>Enterobacter cloacae</i> subsp. <i>cloacae</i> ATCC 13047         | 47     | 0.526      | 38      | Defective P4-like |         |         |      | No <i>int</i>      |
|         |          | pmo:Pmob_0545               | <i>Petrotoga mobilis</i>           | <i>Petrotoga mobilis</i> SJ95                                        | 450    | 0.305      | 95      | No insert         |         |         |      |                    |
|         |          | pri:PRIO_5<br>948           | <i>Paenibacillus riograndensis</i> | <i>Paenibacillus riograndensis</i> SBR5                              | 662    | 0.333      | 57      | No insert         |         |         |      |                    |

**Table S6. Oligonucleotides used in this study.**

| Strain                              | Oligonucleotides         | Sequence (5'-3')                                                                             |
|-------------------------------------|--------------------------|----------------------------------------------------------------------------------------------|
| <b>CFT073</b><br><i>lacZ::tetA</i>  | EcoCFT073-lacZ-1m        | AATGGATTTTCCTTACGCGAAATACGGGCAGACATAGCCTGCC<br>CGGTTATTATTATTTTTGCGCTGTTAATCACTTTACTT        |
|                                     | EcoCFT073-lacZ-2c        | GGCTCGTATGTTGTGTGAAATTGTGAGCGGATAACAATTTCA<br>CACAGGATACAGCTATGACTGGTTATCAAGAGGGTCATTA       |
| <b>CFT073</b><br><i>c1501::tetA</i> | EcoCFT073-tet-1m         | TACGATGGCAGAAACCAGGGCGATGACGGCGACATCGATCG<br>CATACTGAAAACCATCTGACGCTGTTAATCACTTTACTT         |
|                                     | EcoCFT073-tet-2c         | CCCCGTAACGGGTCCATATGCCGGAAGGACCCATAAAAAA<br>AGCCGGATTTCTCCGGCCTTGTCCGGTTATCAAGAGGGTCATT<br>A |
| <b>CFT073</b> $\Delta$ <i>int</i>   | EcoCFT073-int-2m         | CAACGATCGGTGTAGTTAATGGTGTAGTTAATTGTGATGACC<br>GGAATCAAATTATGAGCGTGTAGGCTGGAGCTGCTTCG         |
|                                     | EcoCFT073-int-3c         | TTGTGTCTCGTTGTTTCAGAGTTGTCCGCATCCTGAAAAATC<br>GCAAAAAAATTATATTTCCATATGAATATCCTCCTTA          |
| <b>CFT073</b> $\Delta$ <i>alpA</i>  | EcoCFT073-rep-6m         | ACCCAACCCAATAATCCACCCAATGACTCTTTAAGAAACAACA<br>AAGGGGGAATTGTGTTAGTGTAGGCTGGAGCTGCTTCG        |
|                                     | EcoCFT073-rep-8c         | GTTAGATCTCTGTATTAGTGGATGGGTGGCGGCTGTGTGCC<br>GCCAGCCTGATTAGTGAACCATATGAATATCCTCCTTA          |
| <b>CFT073</b> $\Delta$ <i>pri</i>   | EcoCFT073-pri-3m         | GGCACGGGCAAACATCCAGAAGCTGAAAACCATGATTAACG<br>GATTCAGGGGTAATAAATGGTGTAGGCTGGAGCTGCTTCG        |
|                                     | EcoCFT073-pri-4c         | GTATTTTTCTTTACTCAGGTAGACAGGGTAGACAGCCATTGC<br>AACAAATTATAAAAACGCCATATGAATATCCTCCTTA          |
| <b>CFT073</b> $\Delta$ <i>c1499</i> | EcoCFT073-cap-1m         | ACCTGAATCGCGGGGATATTGCCGAATTTAAATTCAGTCCGC<br>TGTTTACCACGCTGTTTTGTGTAGGCTGGAGCTGCTTCG        |
|                                     | EcoCFT073-cap-2c         | AATATCTGCCGGAACCGGCTGCCGTGCCGTGTGCGTCTGCA<br>CGTACTCAATCGCCGGATCCATATGAATATCCTCCTTA          |
| <b>CFT073</b> $\Delta$ <i>c1500</i> | EcoCFT073-Ac1500-1m      | GGGGGATTCTATGGACACTCCATACATTGAGTTATTTGCAGG<br>CAGTCAGCAGGTCCGCACTGTGTAGGCTGGAGCTGCTTCG       |
|                                     | EcoCFT073-Ac1500-2c      | GTTCCCCCTGCTTATCGGGCCAGCGGCTGAACGGATACGCC<br>AGAACCCGCAAAGGCGCGCATATGAATATCCTCCTTA           |
| <b>CFT073</b><br><i>c1499::cat</i>  | EcoCFT073-adjustchlor-5m | GCGGCGCAGGGTATGAATCAGTTTACGGGGGTGAATAATG<br>ACAGTAAAAGCAATGGCACGGCGCGCCTACCTGTGACGG          |
|                                     | EcoCFT073-adjustchlor-6c | TCAATCGCCGGATCTCCGTCCTCAATCCAGTTTTTTCGGGTAA<br>AACATGTTTTGTGTTGCGGGAATAGGAAGTTTCAATTTAAATGGC |
| <b>CFT073</b> $\Delta$ <i>cos.1</i> | CFT073-AcosN-9m          | ACAAGGCCGAGAAATCCGGCTTTTTTTATGGGTCTTTCCG<br>GCATATGGACCCGTTACGGTCCATATGAATATCCTCCTTAG        |
|                                     | CFT073-AcosN-10c         | TAATCAAGTGGTGGTGGTGTACCTTACGGAAAAACGTCAT<br>AAATAGCGAAAAACCCGCGTGTGTAGGCTGGAGCTGCTTCG        |
| <b>CFT073</b> $\Delta$ <i>cos.2</i> | CFT073-AcosN-11m         | AACTTGCAGAGAAACCGGACATGGATCCCGAAAAATTTTCAT<br>AAATAGTGAACCGCGCGGTCCATATGAATATCCTCCTTAG       |
|                                     | CFT073-AcosN-12c         | CCCCCATCGTTCTGATAGTCTGGTGTGTCGTCGGGTCCTTCCTG<br>GAATTATGGCCCGTTACGTGTGTAGGCTGGAGCTGCTTCG     |
| <b>CFT073</b> $\Delta$ <i>phi1</i>  | EcoCFT073-phi1-1m        | GTAACGGGTTAATGAAAACAATAAGTTAGAGTAAAAACAATA<br>AGTTGGGTTGGTGGTCATGTGTAGGCTGGAGCTGCTTC         |
|                                     | EcoCFT073-phi1-2c        | GCCGTTTAAATCATGATGTTAGAAGCACTGTTTTTTAACGAT<br>GGCGACAAATTGGCGGCCATATGAATATCCTCCTTA           |
| <b>CFT073</b> $\Delta$ <i>phi2</i>  | EcoCFT073-phi2-1m        | GCGGGACACTTTCAGGATTTTGAATTTATTCAATTTTTCCCTT<br>TCTCCAAAATCTCTCCATGTGTAGGCTGGAGCTGCTTC        |
|                                     | EcoCFT073-phi2-2c        | TTAGATGATTAATCCTTTATATTCAATGCATTAAGTTTGT<br>GAGTGGTTTTGCCGTTTCATATGAATATCCTCCTTA             |
| <b>CFT073</b> $\Delta$ <i>phi4</i>  | EcoCFT073-phi4-1m        | TGATGTAATCTTCCCCAAAACCTTCCCCAAAACCTGGCTAT<br>TTTCTATGCTGTTTTGATGTGTAGGCTGGAGCTGCTTC          |
|                                     | EcoCFT073-phi4-2c        | ATAAAAATTATGTATTTCAACTCGCTGATATTTAATCATAAATAT<br>TATTTTCTTGTCTTTGCATATGAATATCCTCCTTA         |
| <b>CFT073</b> $\Delta$ <i>phi5</i>  | EcoCFT-phi5-7m           | GTGAGATGCTTTACGTCTTCCAAGCCCCCTTCTTGCCGTAA<br>ATGTGTGTAGGCTGGAGCTGCTTC                        |

|                                              |                            |                                                                                          |
|----------------------------------------------|----------------------------|------------------------------------------------------------------------------------------|
|                                              | EcoCFT-phi5-8c             | GGCTTTTTTGTGATATTGCTGGTCGTATTACCGTCATATTCC<br>TTCATATGAATATCCTCCTTA                      |
| <b>phi80 <math>\Delta</math>terS</b>         | Ecophi80-AterS-1m          | TAAAAACGGCTAAATAGCCAGAGGGCGTTTCCTTTCTCTGTT<br>TTTGTGTATGGAGTGAGCTGTGTAGGCTGGAGCTGCTTCG   |
|                                              | Ecophi80-AterS-2c          | CGATATATTCACTCAGCAACCCCGGTATTATTTTCATCCAGCG<br>CAGCTGCTTTGTTTCATGGCATATGAATATCCTCCTTA    |
| <b>IHE3034<br/>RS04635-<br/>RS04640::cat</b> | IHE3034-<br>adjustchlor-1m | TTATTGAACAAAACCTGAGAAAACGACATGAAAGCGTCATAAATC<br>GCCATTTTAGATGATTAGGCGCGCCTACCTGTGACGG   |
|                                              | IHE3034-<br>adjustchlor-2c | CACGAACAATATCGAACAACCGCGAACAAGATCAACACGCT<br>TTAATCATTATCATTTCGGAATAGGAACCTTCATTTAAATGGC |
| <b>O42 1749::cat</b>                         | O42-adjustchlor-1m         | CATGGAGCAATCAGCCGATACAGAACAGTAAAGCCGATAACT<br>TGTTAATCACTCGCAGCAGGCGCGCCTACCTGTGACGG     |
|                                              | O42-adjustchlor-2c         | TAATTAATGATTTGCACTACAAAAAGTGCCATAAATCGCAAA<br>ATGACTACACCAGTGACTACACCGTTCCGGAATAGGAA     |
| <b>18098 ORF17-<br/>ORF18::cat</b>           | 18098-chlor-1m             | GCGCGAAAAATACTTACCAGTGGAAGAGGCGCGGAGCGGTTA<br>CGGCGGTAACGGTTGATAGGCGCGCCTACCTGTGACGG     |
|                                              | 18098-chlor-2c             | CATTAACACACCGTTCCACGAACAATATCGAACAACCACGA<br>ACAAAGATGGAATAGGAACCTTCATTTAAATGGC          |

| Plasmid        | Oligonucleotides      | Sequence (5'-3')                                  |
|----------------|-----------------------|---------------------------------------------------|
| <b>pJP1285</b> | EcoCFT073-3mHindIII   | CCCAAGCTTTGGATGCTGATAATTACCACG                    |
|                | EcoCFT073int-1cSphI   | ACATGCATGCCAAAAAAATTATATTTCTCTGGC                 |
| <b>pJP1286</b> | EcoCFT073-3mHindIII   | CCCAAGCTTTGGATGCTGATAATTACCACG                    |
|                | EcoCFT073-2cSphI      | ACATGCATGCATCGCTCAGTTTGTAAAGTGC                   |
| <b>pJP1287</b> | EcoCFT073-1mHindIII   | CCCAAGCTTGTACCCTGAATGATAAACACG                    |
|                | EcoCFT073int-1cSphI   | ACATGCATGCCAAAAAAATTATATTTCTCTGGC                 |
| <b>pJP2027</b> | EcCICFT073-rep-1mPstI | AACTGCAGAACCAATGCATTGGATCCAGAAGCTGAA<br>AACCATG   |
|                | EcCICFT073-rep-2cNotI | ATAAGAATGCGGCCGCTAAACTATTTAAGTTTTCTG<br>ATGTGCGC  |
| <b>pJP2028</b> | EcCICFT073-rep-1mPstI | AACTGCAGAACCAATGCATTGGATCCAGAAGCTGAA<br>AACCATG   |
|                | EcCICFT073-rep-3cNotI | ATAAGAATGCGGCCGCTAAACTATCAAATTATAAAAA<br>CGCGTCGC |
| <b>pJP2029</b> | EcCICFT073-rep-1mPstI | AACTGCAGAACCAATGCATTGGATCCAGAAGCTGAA<br>AACCATG   |
|                | EcCICFT073-rep-4c     | CTCACTGTCCGCCATCTGCG                              |
|                | EcCICFT073-rep-5m     | CGCAGATGGCGGACAGTGAGGTGACGGTGATGAAG<br>CACTGG     |
|                | EcCICFT073-rep-2cNotI | ATAAGAATGCGGCCGCTAAACTATTTAAGTTTTCTG<br>ATGTGCGC  |
| <b>pJP2030</b> | Eco-cos-lambda-3mE    | CCGGAATTCGTTGTTGTTCTGCGGGTTCTG                    |
|                | Eco-cos-lambda-4cH    | CCCAAGCTTCTCAATAGTTCCTGGCTGGAG                    |
| <b>pJP2031</b> | Eco-cos-phi80-1mE     | CCGGAATTCACCGTCAGTGCCGATAAGTTC                    |
|                | Eco-cos-phi80-2cH     | CCCAAGCTTTCGCGTGCGGAATACCATTCCG                   |
| <b>pJP2032</b> | Eco-cos-phi4CFT-3mE   | CCGGAATTCGATTGTTGGTCTGCTGGTAGC                    |
|                | Eco-cos-phi4CFT-4cH   | CCCAAGCTTGATATCAGTTCCCTCTGCGC                     |
| <b>pJP2033</b> | Eco-cos-islaCFT-3mE   | CCGGAATTCGTCCTTGATCGATGTTGG                       |
|                | Eco-cos-islaCFT-4cS   | ACCGGTCGACTCACTGGAGTACTCGTCACGG                   |
| <b>pJP2034</b> | Eco-cos-islaCFT-5mS   | ACGCGTCGACAGAACATCGATTTGATGAAGG                   |

|                |                             |                                  |
|----------------|-----------------------------|----------------------------------|
|                | Eco-cos- <i>islaCFT-6cE</i> | CCGGAATTCGCGATTGTAGGCCAGCATTTC   |
| <b>pJP1288</b> | EcoCFT073rep-1mS            | ACGCGTCGACGTAACCACATTGCCAATAGCC  |
|                | EcoCFT073rep-3cB            | CGCGGATCCTTAGTGAAGTGCCTCGC       |
| <b>pJP1289</b> | EcoCFT073rep-1mS            | ACGCGTCGACGTAACCACATTGCCAATAGCC  |
|                | EcoCFT073rep-2cB            | CGCGGATCCATCTGTGCTTAACACA        |
| <b>pJP1290</b> | EcoCFT073rep-1mS            | ACGCGTCGACGTAACCACATTGCCAATAGCC  |
|                | EcoCFT073rep-5cB            | CGCGGATCCCTCATGCGTTGGGGATAACG    |
| <b>pJP1291</b> | EcoCFT073rep-1mS            | ACGCGTCGACGTAACCACATTGCCAATAGCC  |
|                | EcoCFT073rep-2c             | ATCTGTGCTTAACACA                 |
|                | EcoCFT073rep-4m             | TGTGTTAAGCACAGATGCAGTTCCTAATCAGG |
|                | EcoCFT073rep-5cB            | CGCGGATCCCTCATGCGTTGGGGATAACG    |
| <b>pJP2037</b> | EcoCFT073- <i>alpA-1mE</i>  | CCGGAATTCACAACCCAACCCAATAATCC    |
|                | EcoCFT073- <i>alpA-3cK</i>  | GGGGTACCGCTGTGTGCCGCCAGCCTG      |
| <b>pJP2038</b> | EcoCFT073- <i>c1483-1mE</i> | CCGGAATTCGTAACCACATTGCCAATAGCC   |
|                | EcoCFT073- <i>alpA-11cH</i> | CCCAAGCTTTCAGGCCTGTAAGTTGCTGAC   |
| <b>pJP2039</b> | EcoCFT073-2mE               | CCGGAATTCGCGTTTCTGCCAGTGACGTTT   |
|                | EcoCFT073-3cH               | CCCAAGCTTTGTTTGACGTCTGTAGCAAG    |

| Southern Blot            | Oligonucleotides           | Sequence (5'-3')      |
|--------------------------|----------------------------|-----------------------|
| <b>PmC1172 probe</b>     | Pm-172-1m                  | TATACCCGTTCAACATAACCC |
|                          | Pm-172-2c                  | CTGCGACGTATGGAACACAGC |
| <b>Phage Pm172 probe</b> | Pm-172-3m                  | CAGAATGGTCACGTCATACCG |
|                          | Pm-172-4c                  | GCCTTGGGGGATACGAATTTG |
| <b>EcC1CFT073 probe</b>  | EcoCFT073- <i>c1501-1m</i> | TTTGCGGGTTCTGGCGTATCC |
|                          | EcoCFT073- <i>c1501-2c</i> | AGCCGGATTTCTCCGGCCTTG |

| Excision, circularisation and integration | Oligonucleotides | Sequence (5'-3')      |
|-------------------------------------------|------------------|-----------------------|
| <b>Excision</b>                           | EcoCFT073-1m     | GTACCCTGAATGATAAACACG |
|                                           | EcoCFT073-4c     | TCAACGGGTTGATACTTTACG |
| <b>Circularisation</b>                    | EcoCFT073-3m     | TGGATGCTGATAATTACCACG |
|                                           | EcoCFT073-2c     | ATCGCTCAGTTTGTAAAGTGC |
| <b>Integration</b>                        | EcoCFT073-1m     | GTACCCTGAATGATAAACACG |
|                                           | EcoCFT073-2c     | ATCGCTCAGTTTGTAAAGTGC |

**Table S7. Strains used in this study.**

| Strain                              | Description                                               | Reference  |
|-------------------------------------|-----------------------------------------------------------|------------|
| <b><i>Pasteurella multocida</i></b> |                                                           |            |
| JP13738                             | Pm86. Natural isolate                                     | This work  |
| JP13739                             | Pm172. Natural isolate                                    | This work  |
| <b><i>Escherichia coli</i></b>      |                                                           |            |
| CFT073                              | Natural isolate                                           |            |
| C600                                | Laboratory strain                                         | ATCC 23738 |
| 594                                 | Laboratory strain                                         |            |
| WG5                                 | Laboratory strain                                         |            |
| DH5 $\alpha$                        | Laboratory strain                                         |            |
| JP9293                              | CFT073 c1501::tetA                                        | This work  |
| JP9296                              | JP9293 $\Delta\theta 1::cat$                              | This work  |
| JP9297                              | JP9293 $\Delta\theta 2::cat$                              | This work  |
| JP9298                              | JP9293 $\Delta\theta 4::cat$                              | This work  |
| JP12731                             | JP9293 $\Delta\theta 5::cat$                              | This work  |
| JP9794                              | JP9293 $\Delta int$                                       | This work  |
| JP9795                              | JP9293 $\Delta alpA$                                      | This work  |
| JP9796                              | JP9293 $\Delta pri-rep$                                   | This work  |
| JP9797                              | JP9293 $\Delta c1499$                                     | This work  |
| JP15258                             | JP9293 $\Delta c1500$                                     | This work  |
| JP9802                              | CFT073 lacZ::tetA                                         | This work  |
| JP13343                             | CFT073 c1499::cat                                         | This work  |
| JP13408                             | IHE3034 RS04635-RS04640::cat                              | This work  |
| JP13409                             | O42 1749::cat                                             | This work  |
| JP15585                             | 18098 ORF17-ORF18::cat                                    | This work  |
| JP13694                             | CFT073 c1499::cat $\Delta\theta 4$                        | This work  |
| JP14200                             | DH5alpha pJP1285                                          | This work  |
| JP14201                             | DH5alpha pJP1287                                          | This work  |
| JP14202                             | DH5alpha pJP1286                                          | This work  |
| JP13734                             | DH5alpha pJP2027                                          | This work  |
| JP13735                             | DH5alpha pJP2028                                          | This work  |
| JP13736                             | DH5alpha pJP2029                                          | This work  |
| JP10400                             | C600 lambda lysogen                                       | This work  |
| JP13503                             | JP10400 EcCICFT073-c1499::cat                             | This work  |
| JP15111                             | JP10400 EcCICFT073-c1499::cat $\Delta cos.1$              | This work  |
| JP15112                             | JP10400 EcCICFT073-c1499::cat $\Delta cos.2$              | This work  |
| JP12507                             | 594 phi80 lysogen                                         | This work  |
| JP13888                             | JP12507 EcCICFT073-c1499::cat                             | This work  |
| JP15113                             | JP12507 EcCICFT073-c1499::cat $\Delta cos.1$              | This work  |
| JP15114                             | JP12507 EcCICFT073-c1499::cat $\Delta cos.2$              | This work  |
| JP15116                             | JP12507 EcCICFT073-c1499::cat $\Delta cos.1 \Delta cos.2$ | This work  |

| Strain  | Description                                             | Reference |
|---------|---------------------------------------------------------|-----------|
| JP15175 | JP12507 $\Delta terS$ EcCICFT073-c1499:: <i>cat</i>     | This work |
| JP12712 | JP10400 pET28a                                          | This work |
| JP12713 | JP10400 pJP2030                                         | This work |
| JP12714 | JP10400 pJP2032                                         | This work |
| JP12715 | JP10400 pJP2033                                         | This work |
| JP15178 | JP10400 pJP2034                                         | This work |
| JP14701 | JP12507 pET28a                                          | This work |
| JP14702 | JP12507 pJP2031                                         | This work |
| JP15179 | JP12507 pJP2032                                         | This work |
| JP14703 | JP12507 pJP2033                                         | This work |
| JP15180 | JP12507 pJP2034                                         | This work |
| JP12677 | C600 EcCICFT073-c1501:: <i>tetA</i>                     | This work |
| JP15181 | C600 EcCICFT073-c1501:: <i>tetA</i> $\Delta c1499$      | This work |
| JP15182 | C600 EcCICFT073-c1501:: <i>tetA</i> $\Delta c1500$      | This work |
| JP16616 | C600 EcCICFT073-c1499:: <i>cat</i> pBAD18               | This work |
| JP16617 | C600 EcCICFT073-c1499:: <i>cat</i> pJP2037              | This work |
| JP16618 | C600 EcCICFT073-c1499:: <i>cat</i> $\Delta int$ pJP2037 | This work |
| JP16619 | C600 EcCICFT073-c1499:: <i>cat</i> $\Delta pri$ pJP2037 | This work |
| JP9542  | DH5 $\alpha$ pJP1288                                    | This work |
| JP9543  | DH5 $\alpha$ pJP1289                                    | This work |
| JP9544  | DH5 $\alpha$ pJP1290                                    | This work |
| JP9730  | DH5 $\alpha$ pJP1291                                    | This work |
| JP15799 | DH5 $\alpha$ pBAD18 pJP2038                             | This work |
| JP15800 | DH5 $\alpha$ pJP2037 pJP2038                            | This work |
| JP15801 | DH5 $\alpha$ pBAD18 pJP2039                             | This work |
| JP15802 | DH5 $\alpha$ pJP2037 pJP2039                            | This work |
| JP15218 | C600 pJP1290                                            | This work |
| JP13040 | JP10400 pJP1290                                         | This work |
| JP16582 | 594 pJP1290                                             | This work |
| JP13043 | JP12507 pJP1290                                         | This work |
| JP17362 | JP12507 $\Delta terS$ pJP1290                           | This work |

**Table S8. Plasmid used in this study.**

| Plasmid   | Description                                                                       | Reference                       |
|-----------|-----------------------------------------------------------------------------------|---------------------------------|
| pMAK700   | Cm <sup>R</sup> . Thermosensitive plasmid in <i>E. coli</i>                       | (Hamilton <i>et al.</i> , 1989) |
| pK03 Blue | Cm <sup>R</sup> . Thermosensitive plasmid in <i>E. coli</i>                       | (Solano <i>et al.</i> , 2009)   |
| pGE593    | Amp <sup>R</sup> . Lac reporter plasmid                                           | (Eraso and Weinstock, 1992)     |
| pRW224    | Tet <sup>R</sup> . Lac reporter plasmid                                           | (Lodge <i>et al.</i> , 1992)    |
| pBAD18    | Amp <sup>R</sup> . Expression vector                                              | (Guzman <i>et al.</i> , 1995)   |
| pET28a    | Km <sup>R</sup> . Expression vector                                               | (Novagen)                       |
| pKD46     | Amp <sup>R</sup> . Thermosensitive plasmid with Red system of lambda phage        | (Datsenko and Wanner, 2000)     |
| pCP20     | Amp <sup>R</sup> . Thermosensitive plasmid in <i>E. coli</i> with FLP recombinase | (Datsenko and Wanner, 2000)     |
| pJP1285   | pMAK700 <i>int-att<sub>P</sub></i> EcCICFT073                                     | This work                       |
| pJP1287   | pMAK700 <i>int-att<sub>L</sub></i> EcCICFT073                                     | This work                       |
| pJP1286   | pMAK700 $\Delta$ <i>int-att<sub>P</sub></i> EcCICFT073                            | This work                       |
| pJP2027   | pK03 Blue <i>pri-ori</i> EcCICFT073                                               | This work                       |
| pJP2028   | pK03 Blue <i>pri-<math>\Delta</math>ori</i> EcCICFT073                            | This work                       |
| pJP2029   | pK03 Blue $\Delta$ <i>pri-ori</i> EcCICFT073                                      | This work                       |
| pJP2030   | pET28a cos lambda                                                                 | This work                       |
| pJP2031   | pET28a cos phi80                                                                  | This work                       |
| pJP2032   | pET28a cos phi4 CFT073                                                            | This work                       |
| pJP2033   | pET28a cos.1 EcCICFT073                                                           | This work                       |
| pJP2034   | pET28a cos.2 EcCICFT073                                                           | This work                       |
| pJP1288   | pGE593 <i>alpA-alpA-lacZ</i> EcCICFT073                                           | This work                       |
| pJP1289   | pGE593 $\Delta$ <i>alpA-alpA-lacZ</i> EcCICFT073                                  | This work                       |
| pJP1290   | pGE593 <i>alpA-lcd_like-lacZ</i> EcCICFT073                                       | This work                       |
| pJP1291   | pGE593 $\Delta$ <i>alpA-lcd_like-lacZ</i> EcCICFT073                              | This work                       |
| pJP2037   | pBAD18 <i>alpA</i> EcCICFT073                                                     | This work                       |
| pJP2038   | pRW224 promoter <i>alpA-lacZ</i> EcCICFT073                                       | This work                       |
| pJP2039   | pRW224 promoter <i>int-lacZ</i> EcCICFT073                                        | This work                       |

## References

- Datsenko KA, Wanner BL. (2000). One-step inactivation of chromosomal genes in *Escherichia coli* K-12 using PCR products. *Proc Natl Acad Sci USA* **97**: 6640–6645.
- Guzman LM, Belin D, Carson MJ, Beckwith J. (1995). Tight regulation, modulation, and high-level expression by vectors containing the arabinose PBAD promoter. *J Bacteriol* **177**: 4121–4130.
- Hamilton CM, Aldea M, Washburn BK, Babitzke P, Kushner SR. (1989). New method for generating deletions and gene replacements in *Escherichia coli*. *J Bacteriol* **171**: 4617–4622.
- Lodge J, Fear J, Busby S, Gunasekaran P, Kamini NR. (1992). Broad host range plasmids carrying the *Escherichia coli* lactose and galactose operons. *FEMS Microbiol Lett* **74**: 271–276.
- Solano C, García B, Latasa C, Toledo-Arana A, Zorraquino V, Valle J, *et al.* (2009). Genetic reductionist approach for dissecting individual roles of GGDEF proteins within the c-di-GMP signaling network in *Salmonella*. *Proc Natl Acad Sci USA* **106**: 7997–8002.
